# Health care use attributable to COVID-19: A propensity matched national electronic health records cohort study of 249,390 people in Wales, UK.

Kennedy J<sup>1</sup>, Parker M<sup>1</sup>, Seaborne M<sup>1</sup>, Mhereeg M<sup>1</sup>, Walker A<sup>2</sup>, Walker V<sup>3</sup>, Denaxas S<sup>4</sup>, Kennedy N<sup>1</sup>, Katikireddi S.V<sup>5\*</sup>, Brophy S<sup>1\*</sup>

## Affiliations:

<sup>1</sup>National Centre for Population Health and Wellbeing Research, Swansea University Medical School, Swansea, Wales.

<sup>2</sup>Datalab, Nuffield Dept of Primary Care Health Science, Radcliffe Primary Care Building, Oxford, OX2 6GG.

<sup>3</sup>Bristol Medical School, University of Bristol.

<sup>4</sup>Institute for Health Informatics, UCL, London.

<sup>5</sup>MRC/CSO Social and Public Health Sciences Unit, University of Glasgow, Glasgow.

\* Joint senior leads.

Corresponding author: [j.i.kennedy@swansea.ac.uk](mailto:j.i.kennedy@swansea.ac.uk)

## Abstract

**Background:** To determine the extent and nature of changes in infected patients healthcare utilization, we studied healthcare contact in the 1-4 weeks and 5-24 weeks following a COVID-19 diagnosis compared to propensity matched controls.

**Methods:** Survival analysis was used for time to death and first clinical outcomes including clinical terminology concepts for post-viral illness, fatigue, embolism, respiratory conditions, mental and developmental conditions, fit note, or hospital attendance. Increased instantaneous risk for the occurrence of an outcome for positive individuals was quantified using hazard ratios (HR) from Cox Regression and absolute risk was quantified using relative risk (RR) from life table analysis.

**Results:** Compared to matched individuals testing negative, surviving positive community-tested patients had a higher risk of post-viral illness (HR: 4.57, 95%CI: 1.77-11.80,  $p=0.002$ ), fatigue (HR: 1.47, 95%CI: 1.24-1.75,  $p<0.001$ ) and embolism (HR: 1.51, 95%CI: 1.13-2.02,  $p=0.005$ ) at 5-24 weeks post-diagnosis. In the four weeks after COVID-19 higher rates of sick notes were being issued for community-tested (HR: 3.04, 95%CI: 0.88 to 10.50,  $p<0.079$ ); the risk was reduced after four weeks, compared to controls. Overall healthcare attendance for anxiety, depression was less likely in those with COVID-19 in the first four weeks (HR: 0.83, 95%CI: 0.73-1.06,  $p=0.007$ ). After four weeks, anxiety, depression is less likely to occur for the positive community-tested individuals (HR: 0.87, 95%CI: 0.77-1.00,  $p=0.048$ ), but more likely for positive hospital-tested individuals (HR: 1.16, 95%CI: 1.00-1.45,  $p=0.053$ ). Although statistical associations between positive infection and post-infection healthcare use are clear, the absolute use of healthcare is very.

**Conclusions:** Community COVID-19 disease is associated with increased risks of post-viral illness, fatigue, embolism, depression, anxiety and respiratory conditions. Despite these elevated risks, the absolute healthcare burden is low. Either very small proportions of people experience adverse outcomes following COVID-19 or they are not presenting to healthcare.

**Trial registration:** Data held in SAIL databank are anonymised and therefore, no ethical approval is required. All data in SAIL has the permission from the relevant Caldicott Guardian or Data Protection Officer and SAIL-related projects are required to obtain Information Governance Review Panel (IGRP) approval. The IGRP approval number for this study is 1259.

## Introduction

Considerable concerns exist about chronic, debilitating, and varied symptoms experienced by people who have had coronavirus disease (COVID-19) caused by severe acute respiratory syndrome coronavirus 2 (SARS-CoV-2) infection (1). However, the natural history of morbidity and healthcare use after infection and disease remains unclear. While most people who experience COVID-19 recover quickly, an unknown minority experience prolonged symptoms that manifest as a range of post-COVID-19 illness (1).

As the pandemic continues, meeting the needs of the increasing numbers of people who have recovered from COVID-19 remains important. Recovery from any severe disease can often be protracted. However, there is increasing evidence that even those who were not hospitalised with COVID-19 infection, may have longer-term health consequences, such as chronic fatigue and respiratory issues (1). Hence, a substantial number of people are experiencing persistent symptoms such as pain, heart palpitations, breathlessness, cognitive impairment, and fatigue (2). Many symptoms have been reported following COVID-19 (3), with evidence from a symptom tracker in the UK suggesting the existence of six different syndromes. However, consensus on what clusters of sequelae exist is not available. The highly varied nature of symptoms and experiences reported by patients has made standardised diagnosis difficult. In particular, accurate clinical coding of 'Long COVID' has been lacking, thereby impeding research efforts (4). However, age, self-reported health status before the onset of symptoms, self-reported pre-existing comorbidities and the number of symptoms during the infection were found to significantly predict the number of symptoms patients with long COVID may experience at follow-up (5). The most common symptoms presented to the GP, four weeks after infection, were joint pain (2.5%), anxiety (1.2%) and prescription of non-steroidal anti-inflammatory drugs (1.2%) using routine medical record data (6).

Health systems internationally have been under extreme pressure due to the COVID-19 pandemic. Many countries have faced large demands for healthcare, resulting in elective care being postponed and many patients foregoing or delaying necessary healthcare. These stresses have led to large waiting lists in the UK. The large numbers of SARS-CoV-2 infections could lead to a further demand on healthcare because of long COVID. At present, there is limited data (6) available to inform health systems about the scale of demand that might be expected and what services might be sought. However, establishing the extent to which these conditions are attributable to COVID-19 or reflect disease burden among the general

population can be difficult. Misclassification may also occur because of the general misunderstanding of long-term consequences of COVID-19 and the likelihood that clinicians may attribute unrelated illness, or worsening of existing symptoms, to COVID-19.

Research to establish the natural history of COVID-19 disease over the medium- and long-term can inform understanding of the long-term effect of COVID and potentially inform expectations about future health system demands. This study therefore aims to develop an understanding of the burden on the healthcare system attributable to COVID-19, quantify the length of time of excess resource use, and identify the different diagnostic clusters that underpin any excess healthcare use.

## Methods

### Study design

To investigate primary and secondary healthcare use after a positive reverse transcription – polymerase chain reaction (RT-PCR) test result, we followed a target trial (also called an ‘emulated trial’) design (7,8), e.g. emulating a randomised control trial using observational data, by ensuring cases and controls are as similar as possible at baseline and only the exposure (e.g. COVID positive/negative) differs between the groups. In addition, given the consequences of COVID-19 may differ depending on the severity of the initial disease, we defined two different exposed groups, reflecting different severity of disease: a) Received a positive RT-PCR at a community testing site; and b) received a positive RT-PCR at a hospital testing site (See appendix A for what constitutes a ‘community’ and ‘hospital’ testing site). For each exposed group, we defined two alternative control groups. First, we followed a test negative design (i.e., comparing people who tested positive to those testing negative) to better account for potential under-ascertainment and variable testing. We then compared people who tested negative to controls who had not yet been tested at that time. This latter analysis provided greater statistical power for analysis but was potentially at greater risk of bias due to differential testing. For example, those with any respiratory symptoms would have a COVID-19 test so the non-tested group were predominantly non-symptomatic patients.

### Study population (28/02/2020 to 26/08/2021)

The study used the Secure Anonymised Information Linkage (SAIL) Databank in Wales (9), which includes nation-wide electronic health records from primary and secondary care. The SAIL databank is a data repository which allows person-based data linkage across datasets.

This databank includes Welsh GP data, hospital in- and out-patient records, as well as mortality data collected by the Office of National Statistics (ONS). SAIL holds over a billion anonymised records and has Welsh population coverage for 100% of hospital data and 90% of GPs. It uses a split-file approach to ensure anonymisation and overcome issues of confidentiality and disclosure in health-related data warehousing. Demographic data are sent to a partner organisation, NHS Wales Informatics Service, where identifiable information is removed; clinical data are sent directly to the SAIL Databank and an individual is assigned an encrypted anonymised linking field (ALF). The ALF is used to link anonymised individuals across datasets, facilitating longitudinal analysis of an individual's journey through multiple health, education and social datasets (9).

The data linked in this study (Figure 1) were; Welsh Demographic Service to identify all patients registered with a GP practice and identify when people move in and out of Wales, Primary care GP dataset to identify healthcare contacts in general practice, data collected by GPs are captured via Read Codes version 2 (5-character alphanumeric codes related to diagnosis, medication and process of care codes) (10), the hospital inpatient and outpatient data collected in the Patient Episode Database for Wales, which contains clinical information regarding patients' hospital admissions, discharges, diagnoses and operations using the International Classification of Diseases (ICD-10) clinical classification system. The ONS Mortality dataset contains demographic data, place of death and underlying cause of death (also ICD-10) and test results from the laboratory management information system to identify individuals who have had a laboratory COVID-19 test and the test result.

### **Identifying SARS-CoV-2**

The study identified all people in Wales registered with a Welsh GP and stratified them as having had a SARS-CoV-2 positive test result, a negative result, or no SARS-CoV-2 test between 28/02/2020 and 26/08/2021. Two exposed study cohorts were defined: A) Tested positive for SARS-CoV-2 in the community and B) Tested positive for SARS-CoV-2 in hospital, based on the location data associated with their testing result. Two sets of controls were created through propensity score matching (see below) for each of these exposure groups: C) Controls who tested negative for SARS-CoV-2 (individuals that have negative tests prior to being positive are valid for linking to other individuals which are positive), and D) Controls who had not tested positive for COVID at the index time (but may test positive later and become a case or test negative and enter group A at a later date). Study cohorts identified included: A) Exposed (Case), those tested positive for SARS-CoV-2 when in hospital or in the community B) Controls A who tested negative for SARS-CoV-2 in hospital or the community (individuals that have negative tests prior to being positive are valid for linking to other individuals which

are positive) and, C) Control group B, those who had not been tested for COVID at the index time (but may test later and become cases or enter group A at a later date).

### **Propensity matching**

Exposure to SARS-CoV-2 infection is defined as starting from the date of having a positive RT-PCR test result. A positive hospital case was matched with three controls for control A (test negative) also tested in hospital and three controls from control B (not tested at the index date). A positive community case was matched with three controls for control A tested in the community and control B (not tested). Follow-up of the exposure period was censored for the control participant if the control goes on to have a positive test. Controls who have a positive test were then eligible to be included in the analysis within the exposed group. Cases and controls were propensity matched on; Welsh Index of multiple deprivation quintile (WIMD), comorbidities using the Charlson Comorbidity Index (CCI), number of people in the household, number of previous SARS-CoV-2 tests. In addition to the propensity score the following features were utilised to make the control group; gender, local authority area, week of birth (+/- 1 year from date), and location of the test (community/hospital/other).

### **Data cleaning**

Data were checked for patterns of missingness and implausible values for all analytical variables investigated. A record of reasons for exclusion from analysis was maintained. Individuals with no recorded test location (excluding the untested population) were excluded from the analysis.

### **Outcomes**

The primary outcome was to determine whether testing positive for SARS-CoV-2 results in different use of primary and secondary care in the first 6 months following the test, compared to those who had currently not tested positive.

### **Statistical analysis**

Descriptive statistics were gathered on the negative test, positive test, and untested populations to assess the adequacy of the propensity matching. Frequency of deaths, primary and secondary care visits were tracked each month and adjusted for the population size accounting for individuals who had been censored. General groups of codes used to define the clinical outcomes of this study can be seen in appendix B (full list in appendix E). Sick notes only refer to those issued by the GP and not self-certified notes. Whether the codes originated in primary or secondary and additional notes are also included in this appendix (E). Outcomes include death, first secondary care visit, diabetes, embolism, fatigue, mental and

behavioural disorders, respiratory conditions, post viral illness and sick notes. Alternatively, an individual could be censored. Reasons for censorship include death (from any cause), end of follow-up period (28 days or 168 days), end of study period (01/08/2021), changing COVID-19 test status through a confirmed RT-PCR test or leaving Wales.

Secondary analyses examined a) health care use b) the length of time by which the excess risk associated with SARS-CoV-2 infection and COVID-19 disease has ended.

### **Survival Analysis**

Survival analysis was used to examine the time between an individual's first RT-PCR and the first occurrence of an outcome or endpoint. The time between the index date and the endpoint was calculated for each different outcome independently. Age has been calculated using the week of birth and the date of first test or index date divided by 365.25 to provide the age in years.

Cox proportional hazard models were used to produce hazard ratios (HR) to quantify likelihood the first instantaneous occurrence of an outcome within: i.0 - 28 days (1 month), ii. 29 - 168 days (5 months) following a RT-PCR. The negative test population result was set as the reference group for the positive and untested population. The untested population was compared with the negative group to understand bias in who attends for testing as those who are untested are also unlikely to attend for healthcare for other conditions. The negative test population was also set as the reference group when the data are stratified by test location (community or hospital). Follow up starts on the day of being classified as exposed (or the date of being matched for controls). Follow-up ends on the first of: experiencing the outcome of interest or being censored.

Individual models were run for each outcome, time frame (1-4 weeks & 5-24 weeks) and location (combined location, hospital only and community only). Dataset conditions were dependent on the time frame being studied: i.1-4 weeks: the end of the follow up period was 28 days from the index date, ii.5 - 24 weeks: the follow up period was between 29 and 168 days from the index date. If an RT-PCR positive individual died within the first 28 days all their propensity matched partners were also removed from the analysis. Life table analysis uses the full follow up period between day 0 and 168 from the first test or index date.

### **Life Table Analysis**

Risk ratios (RR) showing the relative risk of an outcome every 4 weeks compared to a reference group were calculated through life table analysis. The analysis creates a ratio of



absolute risk (AR) for each outcome adjusting the population size as individuals are censored. The reference groups for those tested in the community and hospital settings are negative tests in their respective environments. The reference group for the untested population was negative tests in the community only as this was to explore the bias in health care use for those who have not been tested.

## **Software**

The data handling and preparation for survival analysis, descriptive statistics and life table analysis were performed in an SQL database (SAIL) using Eclipse (11) and tabulated in Microsoft Excel for database extraction. Final data preparations specific to survival analysis were performed in RStudio 2021.09.0 such as setting reference groups for the Cox proportional hazard models (12). Survival analysis was performed in R studio using packages 'Survminer' (13) and 'Survival' (14). 'Love Plots' (appendix C) were created in R using the package 'cobalt' (15). Risk ratio and confidence intervals calculations were performed in Microsoft Excel (Version 2201.) and hazard ratio plots (figures 5 - 8) were also manually constructed in Microsoft Excel.

## **Ethical approval**

Data held in the SAIL databank are anonymised and therefore, no NHS ethical approval is required. All data contained in SAIL has the permission from the relevant Caldicott Guardian or Data Protection Officer and SAIL-related projects are required to obtain Information Governance Review Panel (IGRP) approval. The IGRP approval number for this study is 1259.

# Results

## **Demographic of Case Controls**

There were 249,390 people who had a positive SARS-CoV-2 test between 28/02/2020 and 26/08/2021. When these were propensity matched with controls this number reduced to 41,838 individuals, thus removing 83% of the data. The dataset was then further restricted by removing all matches for whom their test location was matched as missing.

Three matched cohorts are used in this study; COVID-19 test positive (case), COVID-19 test negative (control) and not tested (control). 23,015 and 69,566 individuals were identified to have had a positive and negative test respectively. Appendix C shows 'Love Plots' for the



standardised mean distribution before and after the propensity matching had occurred. Censorship patterns were checked and were similar across the cohorts.

### **Death Following RT-PCR**

The mortality rate was higher within the first four weeks of those who tested positive ( $n = 3019.77$ ) compared with individuals who tested negative ( $n = 980.36$ ) or who were untested ( $n = 128.23$ ) (see figure 2). The untested population maintains a low mortality frequency for the entire follow up period (77.29 - 140.55). The mortality frequency in positive and negative controls converges at 5-8 weeks and declines towards the end of the follow-up period. The negative population had a marginally higher frequency during the 5–24-week period.

These findings are also observed in the cox proportional hazard models (see figures 5 - 8). Positive individuals were significantly more likely to die within 28 days of a positive test in both the community (HR: 4.10, 95%CI: 3.38 to 4.97,  $p < 0.001$ ) and hospital (HR: 2.83, 95%CI: 2.50 to 3.22,  $p < 0.001$ ) environments when compared controls. Untested individuals were significantly less likely to die (HR: 0.13, 95%CI: 0.11 to 0.16,  $p < 0.001$ ) compared with tested. After 5 weeks, positive individuals were significantly less likely to die if tested in the community (HR: 0.72, 95%CI: 0.58 to 0.91,  $p = 0.005$ ) more likely to die if tested in hospital (HR: 1.22, 95%CI: 1.01 to 1.47,  $p = 0.037$ ). Untested individuals were much less likely to die than those tested after 5 weeks (HR: 0.36, 95%CI: 0.32 to 0.41,  $p < 0.001$ )

Risk ratios from the life table analysis support the observed trends and can be seen in table 2. They illustrate that individuals are more likely to die following a positive test in both the hospital (RR: 2.77, 95%CI: 2.45 to 3.14) and community (RR: 4.06, 95%CI: 3.35 to 4.92) environment in the first four weeks. After 5 weeks an individual was less likely to die if receiving a positive test in the community or if no test had been taken by this point.

### **Outcomes 1 - 4 - and 5 - 24-weeks Post Test**

#### **Combined Environments**

The hazard ratios, confidence intervals and p-values for the occurrence of each outcome can be seen in figures 3-6. For both environments combined (figure 3), diagnosis of influenza (HR: 5.68, 5.08 to 6.43,  $p < 0.001$ ), fatigue (HR 1.77, 1.34 to 2.35,  $p < 0.001$ ), respiratory condition (HR: 1.53, 1.43 to 1.63,  $p < 0.001$ ), embolism (HR: 1.50, 1.15 to 1.97,  $p < 0.003$ ), requirement for a sick note (HR: 3.58, 95%CI: 1.20 to 10.07,  $p = 0.022$ ) and death (HR: 3.12, 95%CI: 2.80 to 3.46,  $p < 0.001$ ) were higher in the first 4 weeks compared to their propensity matched controls. In the 5–24-week period, previously positive individuals had higher post-viral

syndrome (HR: 4.57, 95%CI:1.77 to 11.08,  $p=0.002$ ), embolism (HR: 1.51, 95%CI:1.13 to 2.02,  $p=0.005$ ) and fatigue (HR: 1.47, 1.24 to 1.75,  $p<0.001$ ). In addition, when compared to negative controls, survivors of COVID-19 were less likely to be diagnosed with anxiety, depression, or other mental or developmental condition codes.

### Separate Test Environments

Hazard ratios for community and hospital tested individuals can be seen in figures 4 and 5. The use of the influenza codes were much higher in those diagnosed in the community (HR: 10.31, 95%CI: 8.53 to 12.50,  $p<0.001$ ) compared to the hospital diagnosed (HR: 3.92, 95%CI: 3.40 to 4.51,  $p<0.001$ ) in the first 4 weeks. Sick notes were more likely to be given following a positive test in hospital (HR: 3.04, 95%CI: 0.88 to 10.50,  $p=0.079$ ) and community sites (HR: 6.43, 95%CI: 0.58 to 70.90,  $p=0.130$ ). Fatigue occurred with a similar frequency 1-4 weeks following tests at either location Hospital (HR: 1.81, 95%CI:1.08 to 3.02,  $p = 0.024$ ) and community (HR: 1.76, 95%CI: 1.26 to 2.46,  $<0.001$ ). Embolism codes occurred more frequently within 1-4 weeks in the community (HR: 2.83, 95%CI: 1.91 to 4.21,  $p<0.001$ ) vs Hospital (HR: 0.88, 95%CI: 0.55 to 1.27,  $p = 0.440$ ).

Individuals were more at risk of post-viral syndrome following a test in the community (HR:4.65, 95%CI: 1.52 to 14.20,  $p<0.007$ ) and hospital (HR: 4.40, 95%CI: 0.73 to 26.30,  $p<0.100$ ). Regardless of the environment, individuals who had tested positive were more likely to have an embolism code 5-24 weeks following a test (HR: 1.50, 95%CI:1.01 to 2.21,  $p = 0.043$ ) (community) and (HR:1.54, 95%CI 1.01 to 2.37,  $p = 0.047$ ) (hospital). Survivors of COVID tested in the community appeared to be at a lower risk from anxiety, depression and self-harm (HR: 0.87, 95%CI: 0.77 to 1.00,  $p = 0.048$ ), however those tested in the hospital were at an increased risk (HR: 1.20, 95%CI: 1.00 to 1.45,  $p = 0.053$ ).

### Untested Controls

Hazard ratios for the untested controls comparison to test negative individuals can be seen in figure 6. The people who did not have any record of a COVID test between 28/02/2020 and 26/08/2021 were at a lower risk of all outcomes.

### Fatigue

Fatigue was higher for the entire follow-up period for those who had tested positive. Community rates were comparable to those in hospital. Those who had been in hospital (but tested negative) had higher levels of fatigue than people in the community who were untested (see figure 7).

## **Embolism**

Across all groups, the overall volume of events is very low. The risk of embolism (figure 8) is much higher in those who were in hospital. The rates are equivalent in those testing either positive or negative. There appears to be a greater volume of events within the first 3 weeks for those who were hospital negative vs hospital positive. There seems to be an equivalent number of events up to around 140 days where there begin to be marginally more in the hospital negative group. Positive cases in the community also seem to have a greater volume of events compared to community negative. Beyond 3 weeks both community groups appear to have a similar frequency of events shown by a similar gradient.

## **Life Table Analysis**

Table 2 shows individuals who tested positive in the community have an increased risk or increased trend of a first embolism and first fatigue code occurring through almost the entire follow up period. Community positive individuals are only less at risk of an embolism code 21-24 weeks following a test.

## **Discussion**

**Principle findings:** This study examines the health care use 1-4 and 5-24 weeks following COVID-19 using propensity matched control methods to emulate a trial and suggest causal inference. It compares individuals who test positive for SARS-CoV-2 with controls who are propensity matched to account for deprivation, comorbidities, numbers in the households, number of previous SARS-CoV-2 tests (i.e., propensity to test positive), gender, age, and local authority area. These findings relate to testing prior to the identification of the Omicron variant and therefore includes all variants except Omicron. The cohorts were stratified by individuals testing in the community or hospital and their matches also needed to have been tested in the same stratification. Experiencing COVID-19, even if not accompanied by hospital admission, was associated with an increased risk of fatigue, post-viral illness, and a higher risk of embolism in the community cohort (e.g., code for Venous thromboembolism). The risk of death was greater for COVID positive individuals in the first four weeks, but no excess mortality risk was seen after that. Overall, positive individuals were less likely to receive codes for anxiety, depression, or self-harm. However, after 4 weeks positive individuals tested in hospital had an increased risk.

**Strengths and Limitations:** This study has several strengths, it utilises an entire country's (Wales) primary and secondary care data and so gives a national perspective of outcomes of COVID-19, making the work generalisable as it is a total population cohort. The use of propensity matching has the advantage of adjusting for many variables and so adjusting for propensity to contact COVID and account for a rich set of covariates which are associated with infection risk, so giving robust findings of association outcomes with surviving COVID. In addition, we were able to match and so control for differences between those tested in the community compared to when they attend a hospital. However, the matching did reduce the sample size of COVID patients from 249,390 to 98,600 which means a loss of 60% of COVID cases who did not have a match, this would result in a loss of precision for detecting rare events. Some limitations of this study include, the study only investigates the first occurrence and does not reflect total burden or duration of an existing problem for example, this study showed higher levels of fatigue in those with COVID, but it did not show how long this fatigue lasts for as the analysis gives a time to first mention of a fatigue diagnosis. This study examines engagement with healthcare and so can reflect use and burden to the health care system due to COVID specifically. However, it cannot capture the unmet need of people who have morbidity associated with COVID but do not seek healthcare for their illness. In addition, this study could not identify diagnosis which may not have a clear coding that can be captured using the GP or hospital system, such as memory loss, or brain fog which have been found to be associated with COVID (16).

**Comparison with other studies:** The finding that those who survive COVID show higher rates of cardiovascular disease is in agreement with other published findings, such as findings that several cardiovascular disorders are higher in veterans data in the US (17) and higher rates of venous thromboembolism (6) using CPRD data in the UK. However, the finding that there is no overall increase in diagnosis of mental health problems was at odds with literature from the US veterans study(16) and a study using the US TriNetX (3) dataset which both find higher rates of psychiatric morbidity and mental health diagnosis after COVID (18). The difference in findings may be due to differences in the variables used to the propensity scores to match with test negative patients, or real differences in risk of mental health conditions associated with the health care system (US compared to UK) and with population included e.g. US veterans cohort vs Wales population cohort.

**Implications and future research:** The absolute numbers of contacting their health care professional with long term effects of COVID are low and there was no increased need for sick notes compared to a matched comparison group after 4 weeks. Therefore, the findings are reassuring that post-COVID adverse consequences do occur but the overall number of people

seeking health care for this are low. It must be noted though that some adverse events such as embolism are serious and so clinicians should be aware of higher rates for a prolonged period in those who have had COVID. In addition, more work is needed to examine the burden to patients who are not seeking health care.

**Conclusions:** This used a national cohort of people with COVID-19, showed risk of fatigue, post-viral syndrome and embolism is higher compared to a propensity matched comparison group and this was for those hospitalised and non-hospitalised and lasted for at least 24 weeks. Absolute numbers of those attending health care settings for complications of COVID are low (e.g. 1% of those surviving COVID) but some of the burden may be undiagnosed due to sufferers not presenting to a health care setting.

## Funding:

This work was funded by the National Core Studies, an initiative funded by UKRI, NIHR and the Health and Safety Executive. The COVID-19 Longitudinal Health and Wellbeing National Core Study was funded by the Medical Research Council (MC\_PC\_20030). SVK acknowledges funding from a NRS Senior Clinical Fellowship (SCAF/15/02), the Medical Research Council (MC\_UU\_00022/2) and the Scottish Government Chief Scientist Office (SPHSU17).

## Acknowledgements:

This study is part of the National Centre for Population Health and Wellbeing, which is funded by Health Care Research Wales. This study makes use of anonymised data held in the Secure Anonymised Information Linkage (SAIL) Databank (9,19,20). We would like to acknowledge all the data providers who make anonymised data available for research.

This work was supported by Health Data Research UK, which receives its funding from HDR UK Ltd (HDR-9006) funded by the UK Medical Research Council, Engineering and Physical Sciences Research Council, Economic and Social Research Council, Department of Health and Social Care (England), Chief Scientist Office of the Scottish Government Health and Social Care Directorates, Health and Social Care Research and Development Division (Welsh Government), Public Health Agency (Northern Ireland), British Heart Foundation (BHF) and the Wellcome Trust.

The responsibility for the interpretation of the information supplied is the authors' alone.

## References

1. Drew DA, Nguyen LH, Steves CJ, Menni C, Freydin M, Varsavsky T, et al. Rapid implementation of mobile technology for real-time epidemiology of COVID-19. *Science* [Internet]. 2020 Jun 19 [cited 2022 Mar 3];368(6497):1362–7. Available from: <https://www.science.org/doi/abs/10.1126/science.abc0473>
2. Kingstone T, Taylor AK, O'Donnell CA, Atherton H, Blane DN, Chew-Graham CA. Finding the “right” GP: a qualitative study of the experiences of people with long-COVID. *BJGP Open* [Internet]. 2020 Dec 1 [cited 2022 Mar 3];4(5):1–12. Available from: <https://bjgpopen.org/content/4/5/bjgpopen20X101143>
3. Taquet M, Geddes JR, Husain M, Luciano S, Harrison PJ. 6-month neurological and psychiatric outcomes in 236 379 survivors of COVID-19: a retrospective cohort study using electronic health records. *The Lancet Psychiatry* [Internet]. 2021 May 1 [cited 2022 Mar 6];8(5):416–27. Available from: <http://www.thelancet.com/article/S2215036621000845/fulltext>
4. Williamson EJ, Walker AJ, Bhaskaran K, Bacon S, Bates C, Morton CE, et al. Factors associated with COVID-19-related death using OpenSAFELY. *Nature* 2020 584:7821 [Internet]. 2020 Jul 8 [cited 2022 Mar 3];584(7821):430–6. Available from: <https://www.nature.com/articles/s41586-020-2521-4>
5. Goërtz YMJ, Herck M van, Delbressine JM, Vaes AW, Meys R, Machado FVC, et al. Persistent symptoms 3 months after a SARS-CoV-2 infection: the post-COVID-19 syndrome? *ERJ Open Research* [Internet]. 2020 Oct [cited 2022 Mar 3];6(4):00542–2020. Available from: </pmc/articles/PMC7491255/>
6. Whittaker HR, Gulea C, Koteci A, Kallis C, Morgan AD, Iwundu C, et al. GP consultation rates for sequelae after acute covid-19 in patients managed in the community or hospital in the UK: population based study. *BMJ* [Internet]. 2021 Dec 29 [cited 2022 Mar 3];375. Available from: <https://www.bmj.com/content/375/bmj-2021-065834>
7. Danaei G, García Rodríguez LA, Cantero OF, Logan RW, Hernán MA. Electronic medical records can be used to emulate target trials of sustained treatment strategies. *Journal of Clinical Epidemiology* [Internet]. 2018 Apr 1 [cited 2022 Mar 3];96:12–22. Available from: <http://www.jclinepi.com/article/S0895435617304997/fulltext>
8. Hernán MA, Robins JM. Using Big Data to Emulate a Target Trial When a Randomized Trial Is Not Available. *American Journal of Epidemiology* [Internet]. 2016 Apr 15 [cited 2022 Mar 3];183(8):758–64. Available from: <https://academic.oup.com/aje/article/183/8/758/1739860>
9. Jones KH, Ford D v., Thompson S, Lyons RA. A Profile of the SAIL Databank on the UK Secure Research Platform. *International Journal of Population Data Science* [Internet]. 2019 Nov 20 [cited 2022 Mar 3];4(2). Available from: <https://ijpds.org/article/view/1134>
10. NHS Digital. Read Codes [Internet]. [cited 2022 Feb 16]. Available from: <https://digital.nhs.uk/services/terminology-and-classifications/read-codes>
11. IBM. Eclipse [Internet]. [cited 2022 Mar 3]. Available from: <https://www.ibm.com/support/pages/java-sdk-downloads-eclipse>



12. RStudio Team. RStudio | Open source & professional software for data science teams - RStudio [Internet]. Boston; 2021 [cited 2022 Mar 3]. Available from: <https://www.rstudio.com/>
13. Kassambara A, Kosinski M, Biecek P. survminer: Drawing Survival Curves using “ggplot2” [Internet]. 2021 [cited 2022 Mar 3]. Available from: <https://cran.r-project.org/web/packages/survminer/index.html>
14. Therneau T. A Package for Survival Analysis in R [Internet]. 2021 [cited 2022 Mar 3]. Available from: <https://cran.r-project.org/web/packages/survival/index.html>
15. Noah Greifer. cobalt: Covariate Balance Tables and Plots. 2022.
16. Rivera-Izquierdo M, Láinez-Ramos-Bossini AJ, de Alba IG-F, Ortiz-González-Serna R, Serrano-Ortiz Á, Fernández-Martínez NF, et al. Long COVID 12 months after discharge: persistent symptoms in patients hospitalised due to COVID-19 and patients hospitalised due to other causes-a multicentre cohort study. BMC medicine [Internet]. 2022 Dec [cited 2022 Mar 6];20(1). Available from: <https://pubmed.ncbi.nlm.nih.gov/35193574/>
17. Xie Y, Xu E, Bowe B, Al-Aly Z. Long-term cardiovascular outcomes of COVID-19. Nature Medicine 2022 [Internet]. 2022 Feb 7 [cited 2022 Mar 3];1–8. Available from: <https://www.nature.com/articles/s41591-022-01689-3>
18. Xie Y, Xu E, Al-Aly Z. Risks of mental health outcomes in people with covid-19: cohort study. BMJ [Internet]. 2022 Feb 16 [cited 2022 Mar 6];376:e068993. Available from: <https://www.bmj.com/content/376/bmj-2021-068993>
19. Rodgers SE, Demmler JC, Dsilva R, Lyons RA. Protecting health data privacy while using residence-based environment and demographic data. Health & Place. 2012 Mar 1;18(2):209–17.
20. Lyons RA, Ford D v., Moore L, Rodgers SE. Use of data linkage to measure the population health effect of non-health-care interventions. The Lancet. 2014 Apr 26;383(9927):1517–9.

## Tables

**Table 1:** Demographic profile of propensity matched infected and non-infected individuals analysed.

**Table 2.** The risk ratios [95% confidence intervals] from life table analysis are presented and show the relative risk of a first event each month following a positive covid test or from the index date (Untested). Reference groups are stated in the first row. Sick notes and post viral syndrome removed due to insufficient data. [Key: Green:  $\leq 0.99$ , Red  $\geq 1.01$  & 95%CI Does not cross 1.00 threshold].

## Figures

**Figure 1:** Flow Diagram of participants.



**Figure 2.** Deaths Per 100,000 Every 4 Weeks Following a COVID-19 Test or the Index Date (Untested)

**Figure 3** - Displays the hazard ratio for the altered chance of an outcome if an individual had a positive COVID-19 test in either the hospital or community environment. The reference group is any negative COVID-19 test result in either environment.

**Figure 4** - Displays the hazard ratio for the altered chance of an outcome if an individual had a positive COVID-19 test in the community environment only. The reference group is negative COVID-19 tests in the community environment only.

**Figure 5** - Displays the hazard ratio for the altered chance of an outcome if an individual had a positive COVID-19 test in the hospital environment. The reference group is negative COVID-19 tests in the hospital environment only. Hazard ratios in boxes exceed the x-axis, and the positive value has been capped at a value of 15.

**Figure 6** - Displays the hazard ratio for the altered chance of an outcome if an individual has not had a COVID-19 test. This comparison was used to examine possible bias in the tested population compared to the untested.

**Figure 7:** Time to first fatigue code by COVID diagnosis.

**Figure 8:** Time to First Embolism Code by COVID-19 diagnosis.

## Appendix

**Appendix A:** Individual SARS-CoV-2 testing sites included under each testing location.

**Appendix B:** Location origins of the codes used to define the outcomes in the study. Additional notes also provided.

**Appendix C:** Shows 'Love Plots' for the main covariates before and after the propensity matching had taken place for community and hospital tested individuals.

**Appendix D:** Shows the raw values for figure 2 which show death, primary and secondary care codes per 100,000 individuals.

**Appendix E:** Table of Codes under investigation.

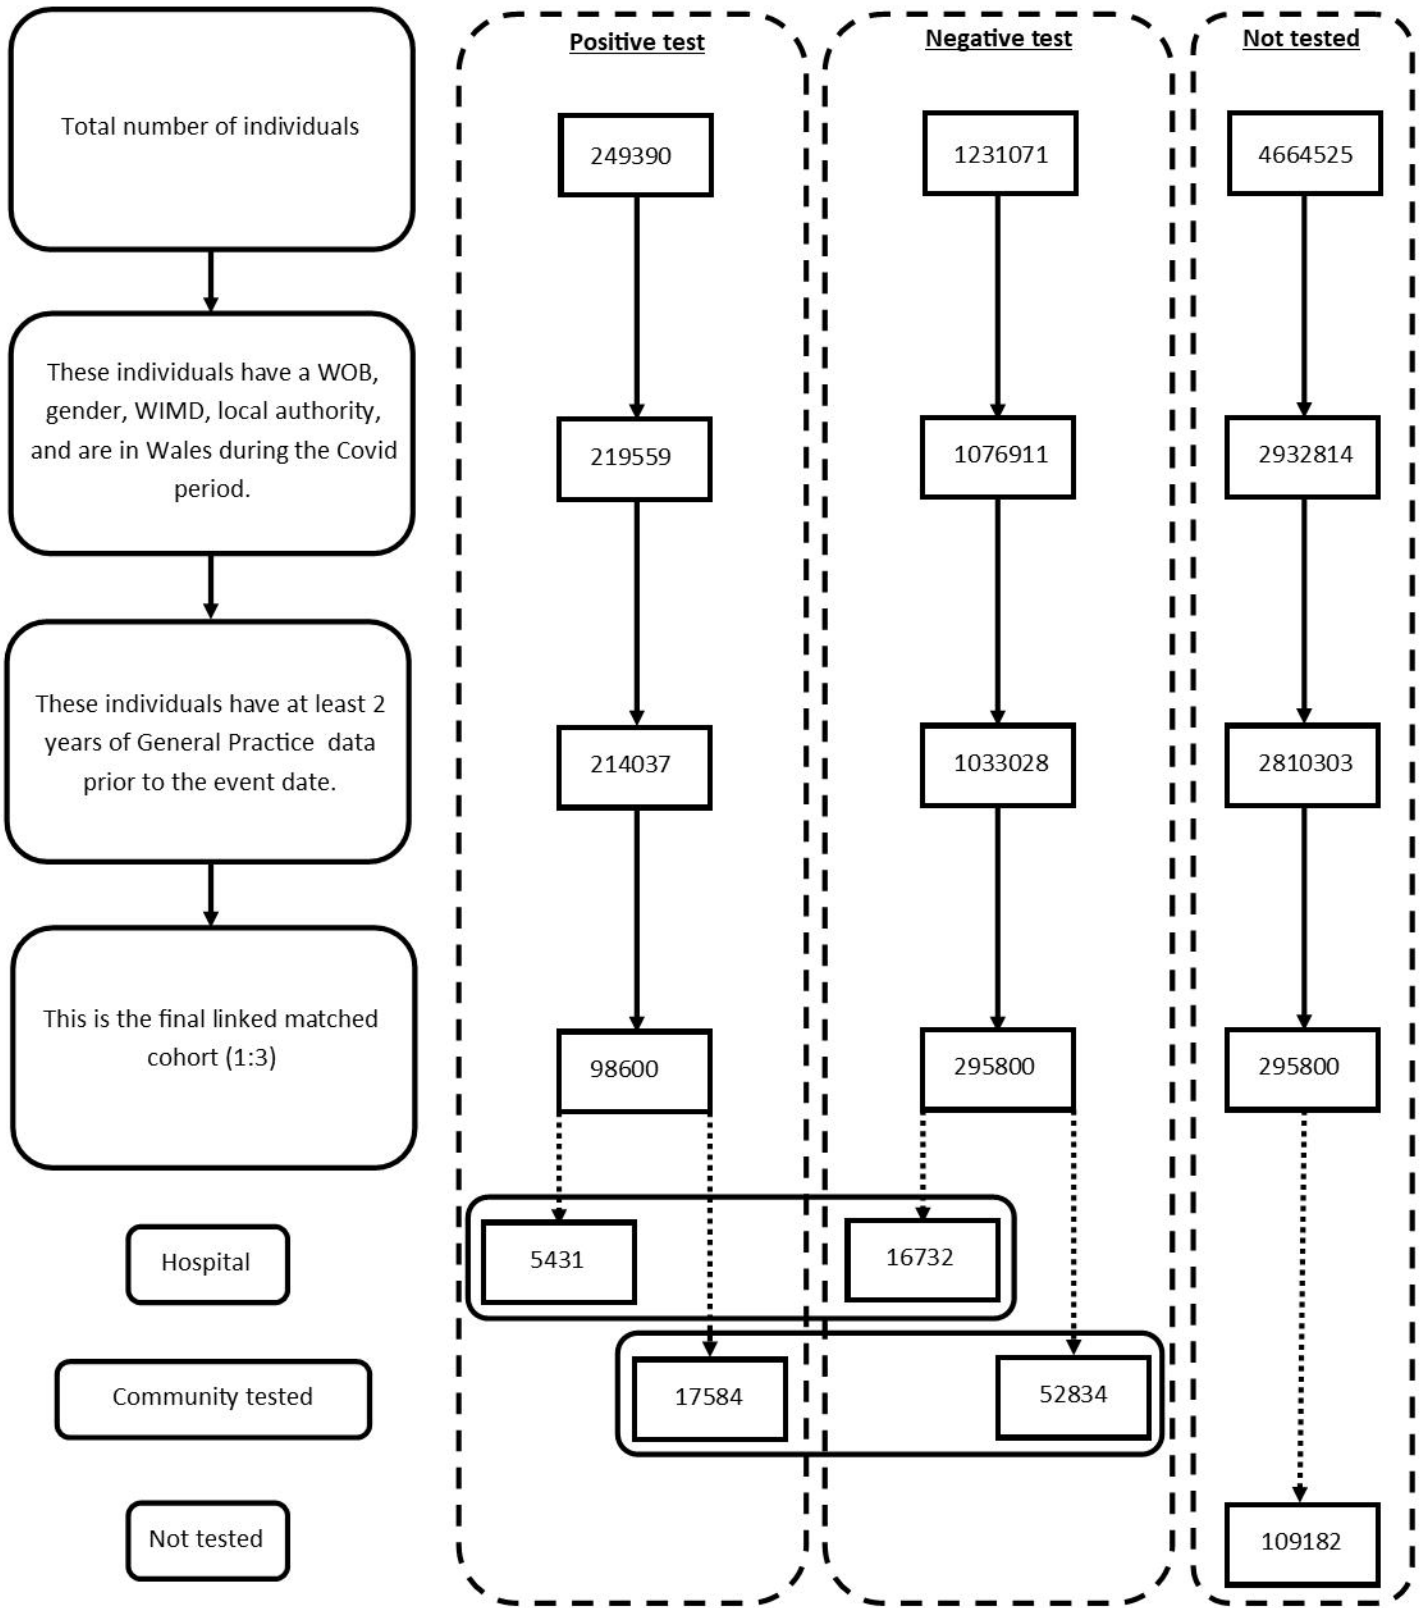

Being Positive For COVID 19 Not Associated With Greater Risk of Death Beyond 4 Weeks Post Test

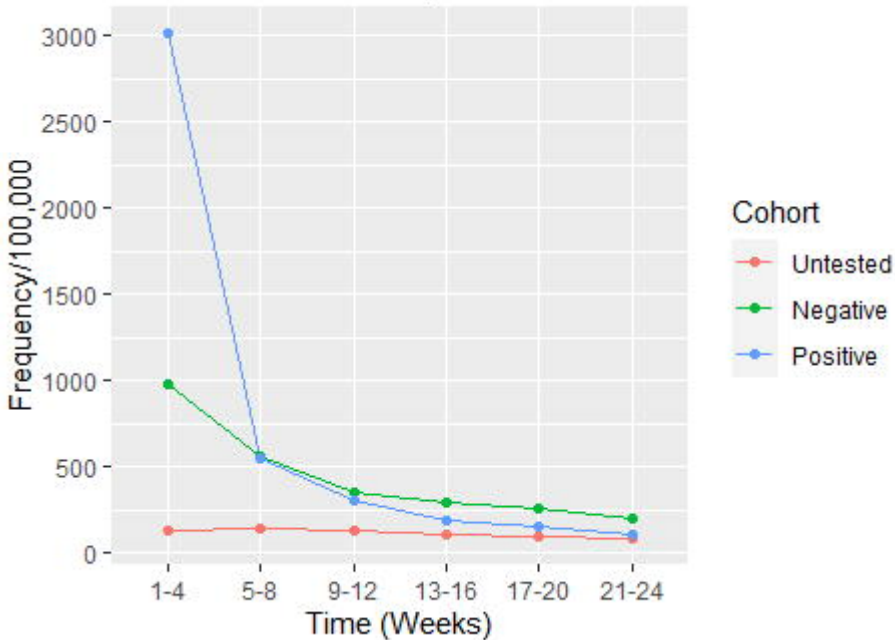

# Hazard Ratio for First Outcome 1 - 4 and 5 - 24 Weeks Following a RT-PCR in the Hospital or Community Environment (Reference: All Negative Tests)

**Outcome - Time (Weeks)**

**Hazard Ratio [95% CI: p - Value]**

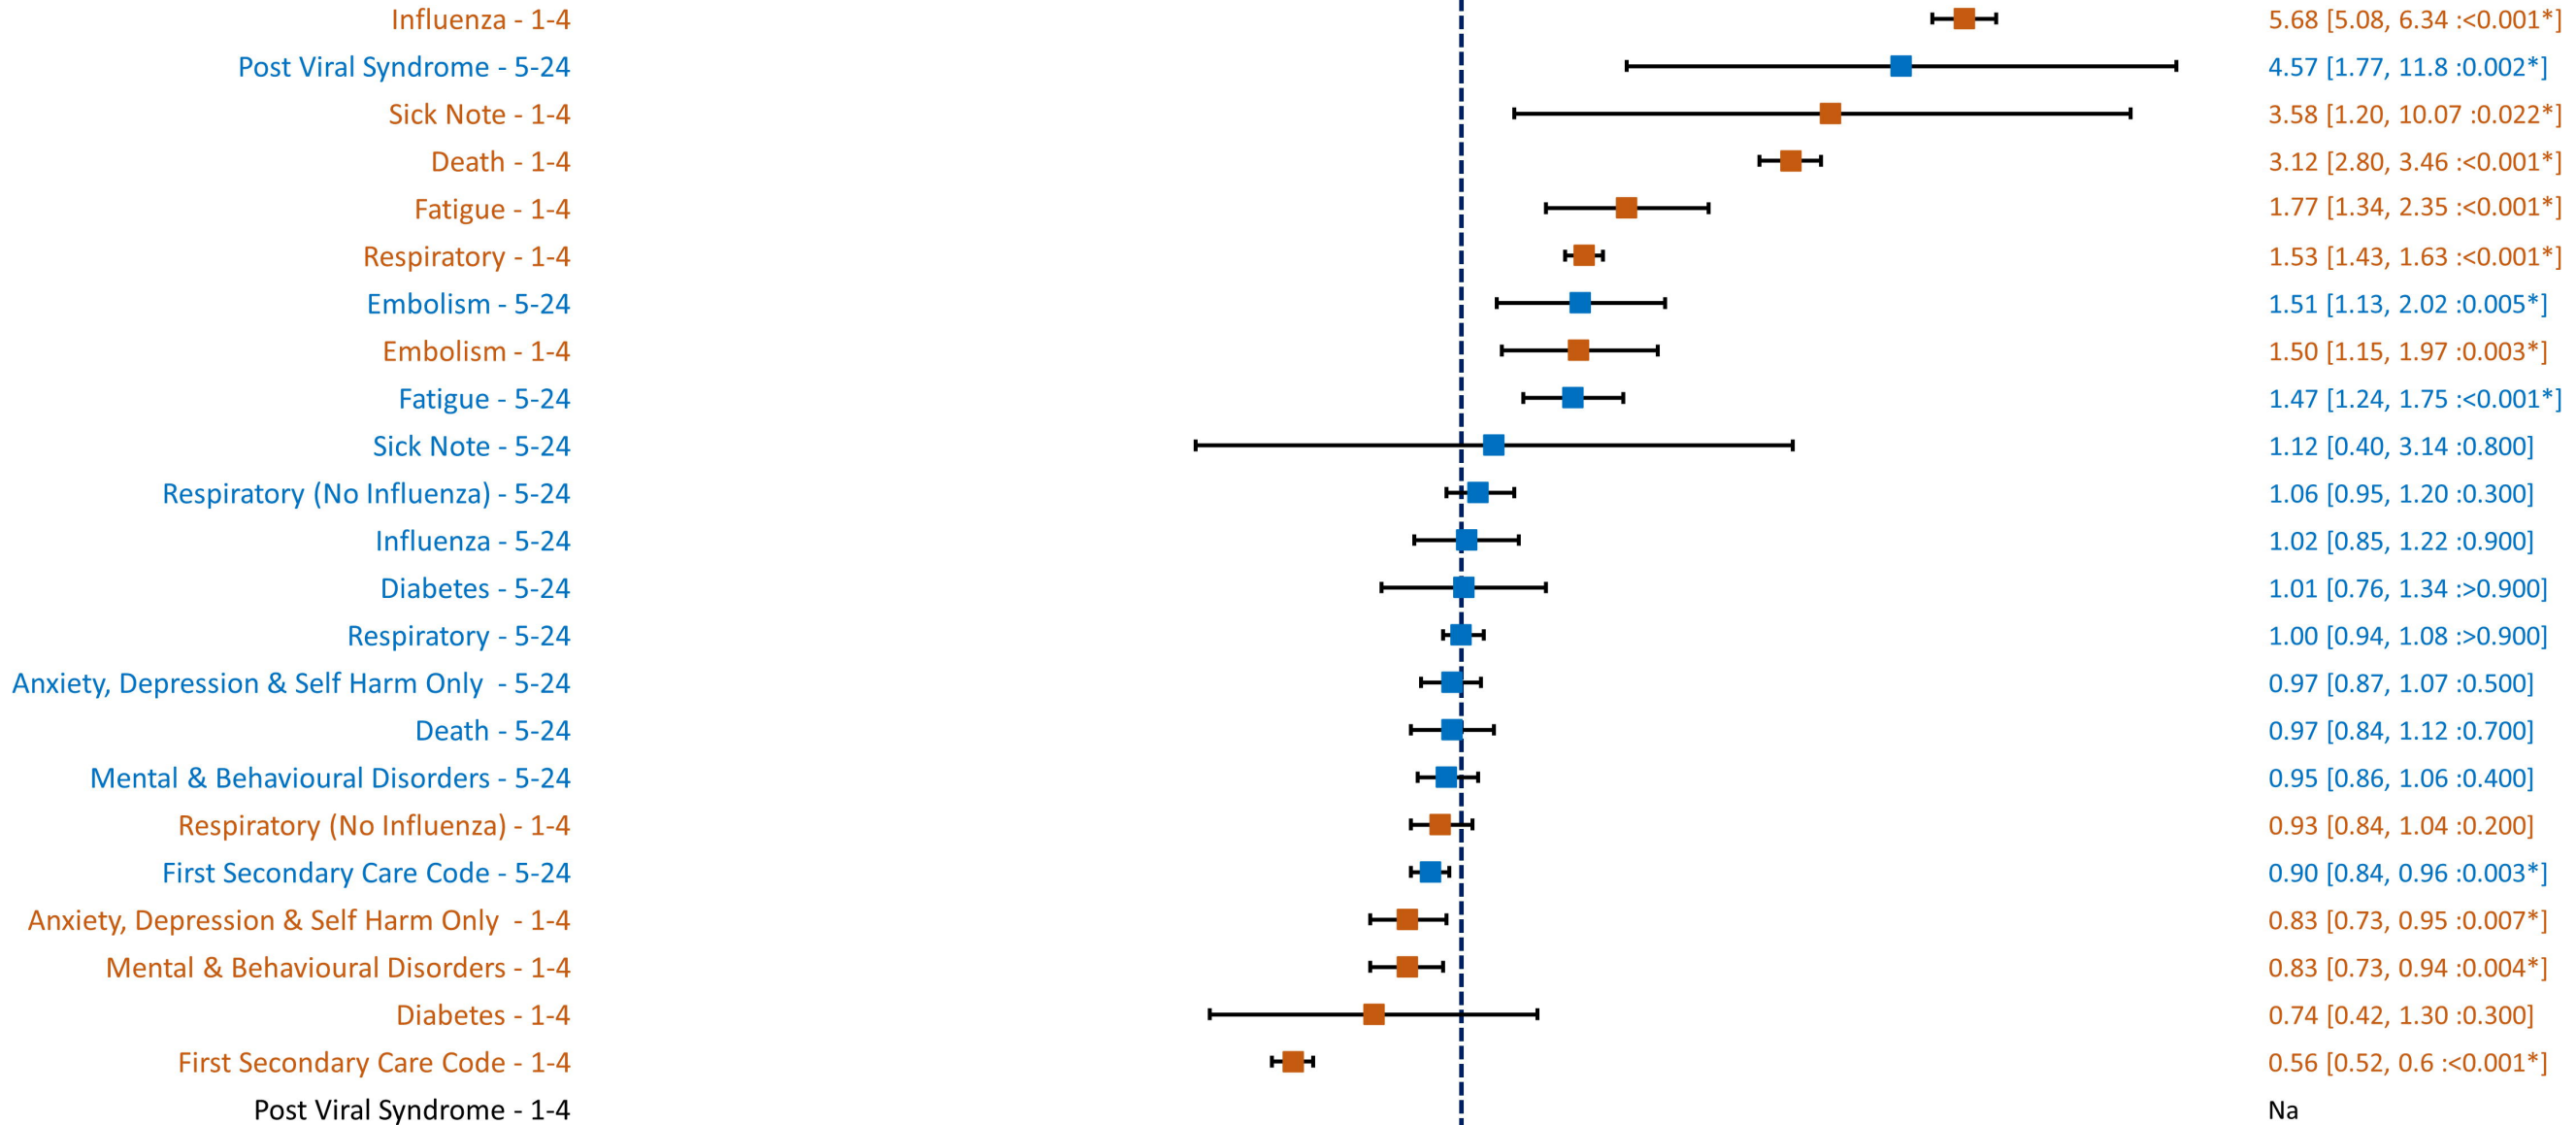

0.05      0.14      0.37      1.00      2.72      7.38

**HR (Natural Log Scale)**

# Hazard Ratio for First Outcome 1 - 4 and 5 - 24 Weeks Following a RT-PCR in the Community Environment (Reference: Community Negative Tests)

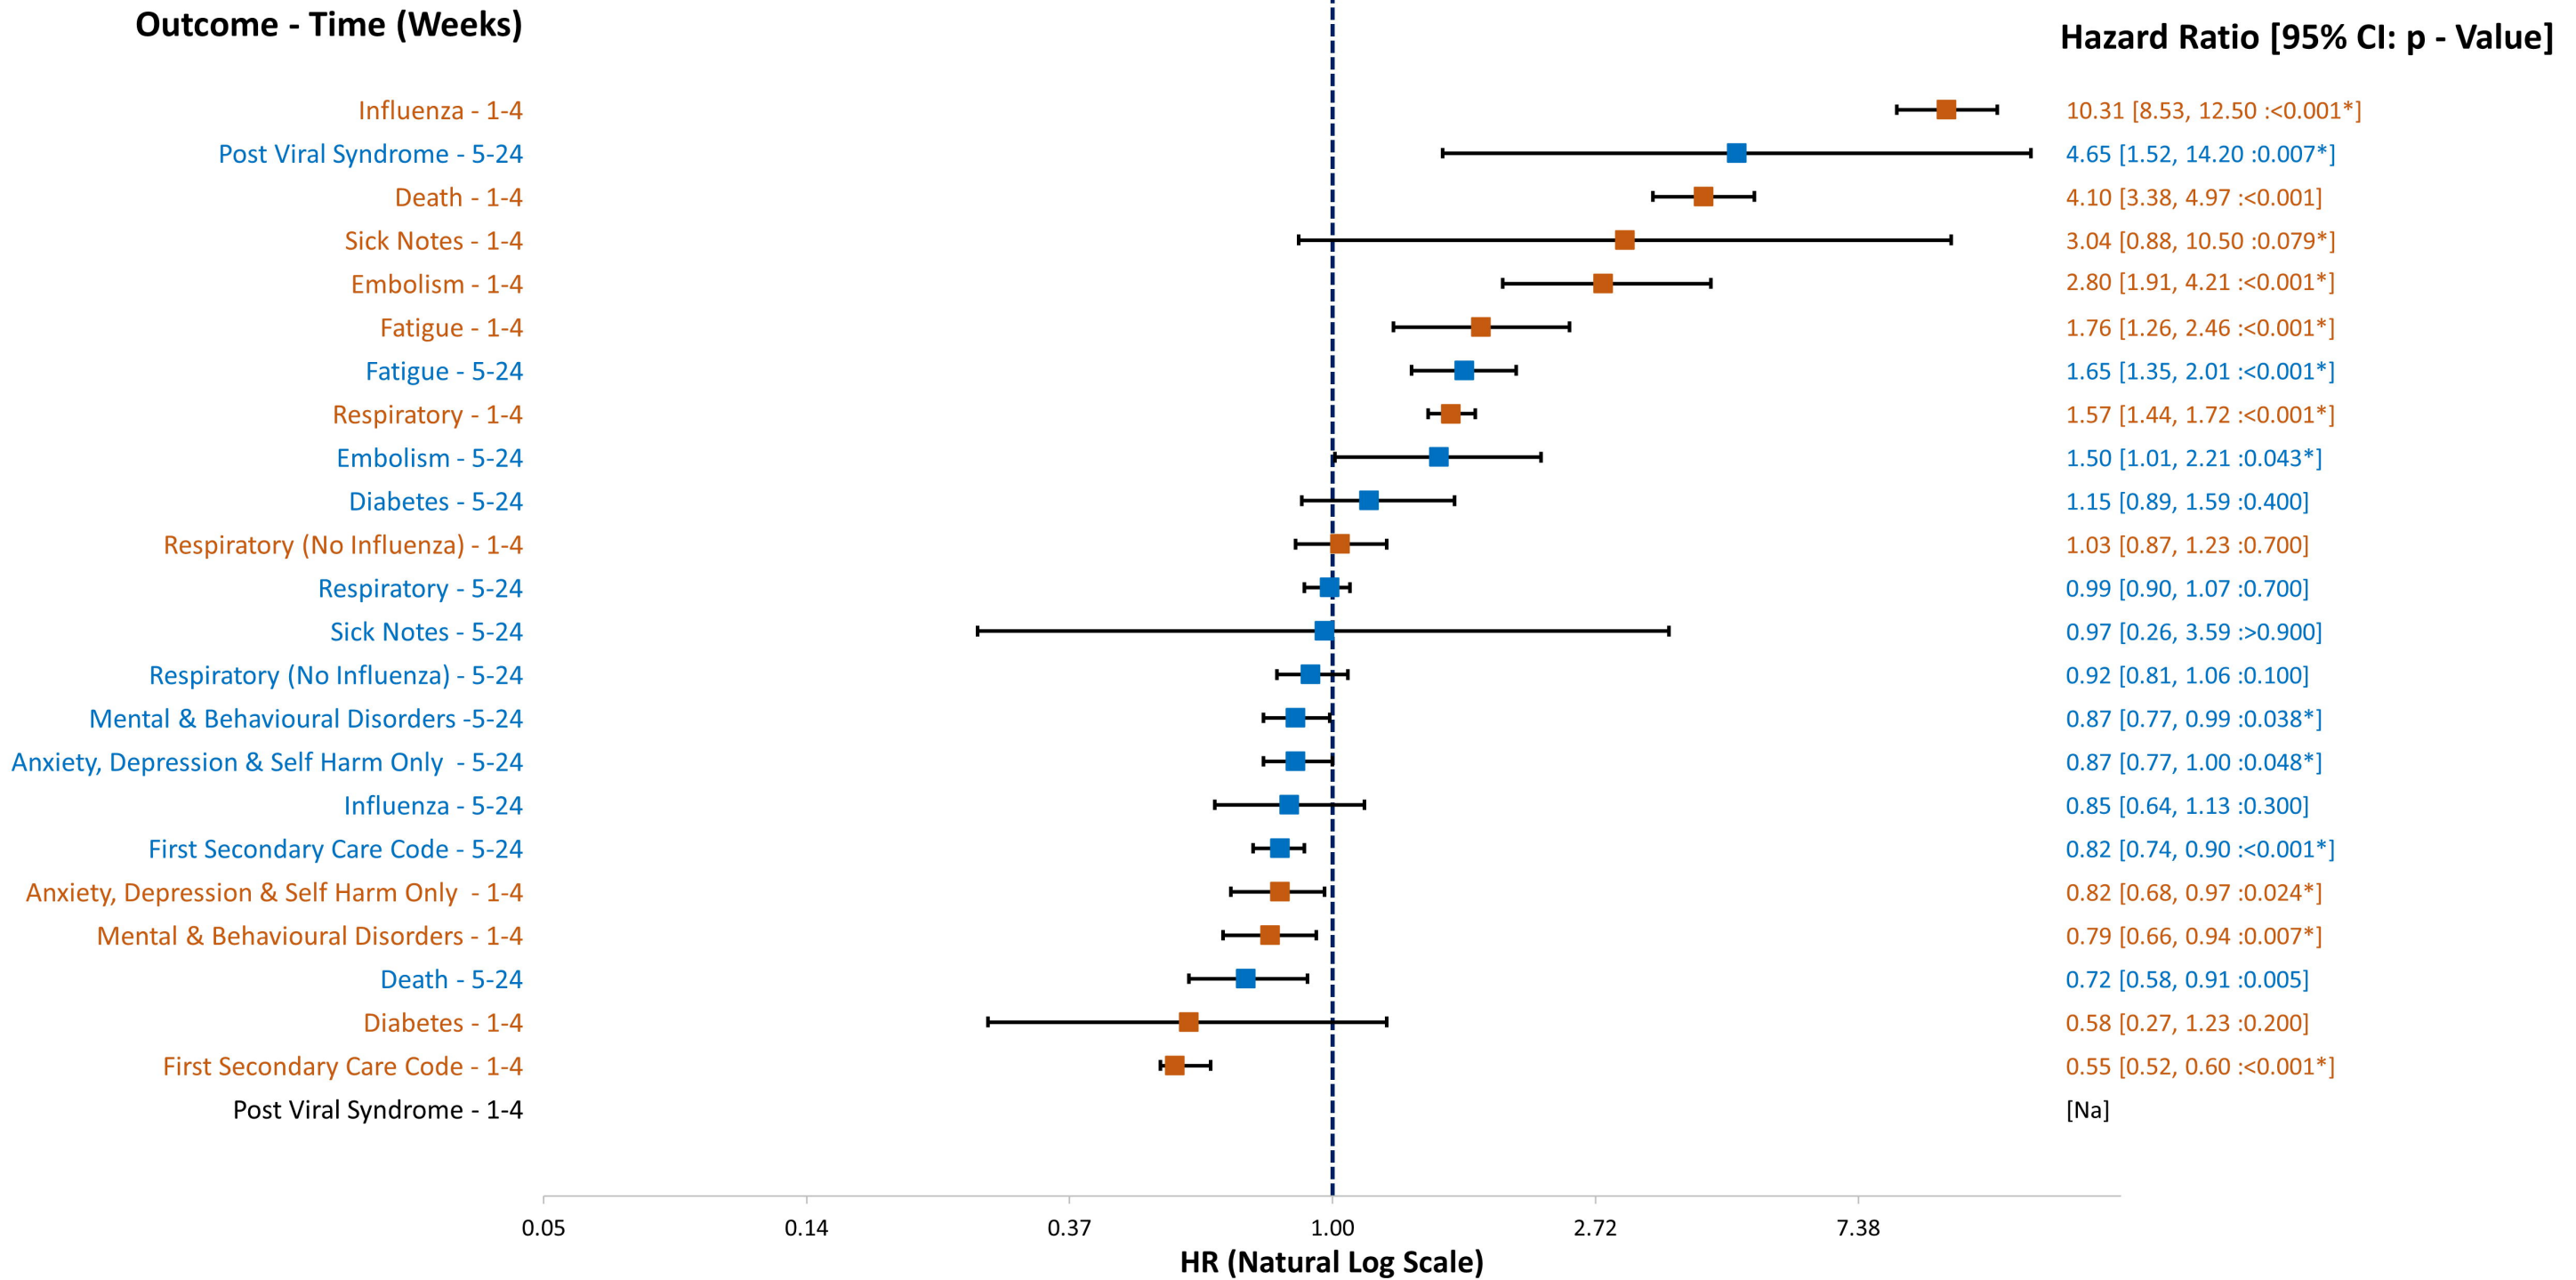

# Hazard Ratio for First Outcome 1 - 4 and 5 - 24 weeks following a RT-PCR in the Hospital Environment (Reference: Hospital Negative Tests)

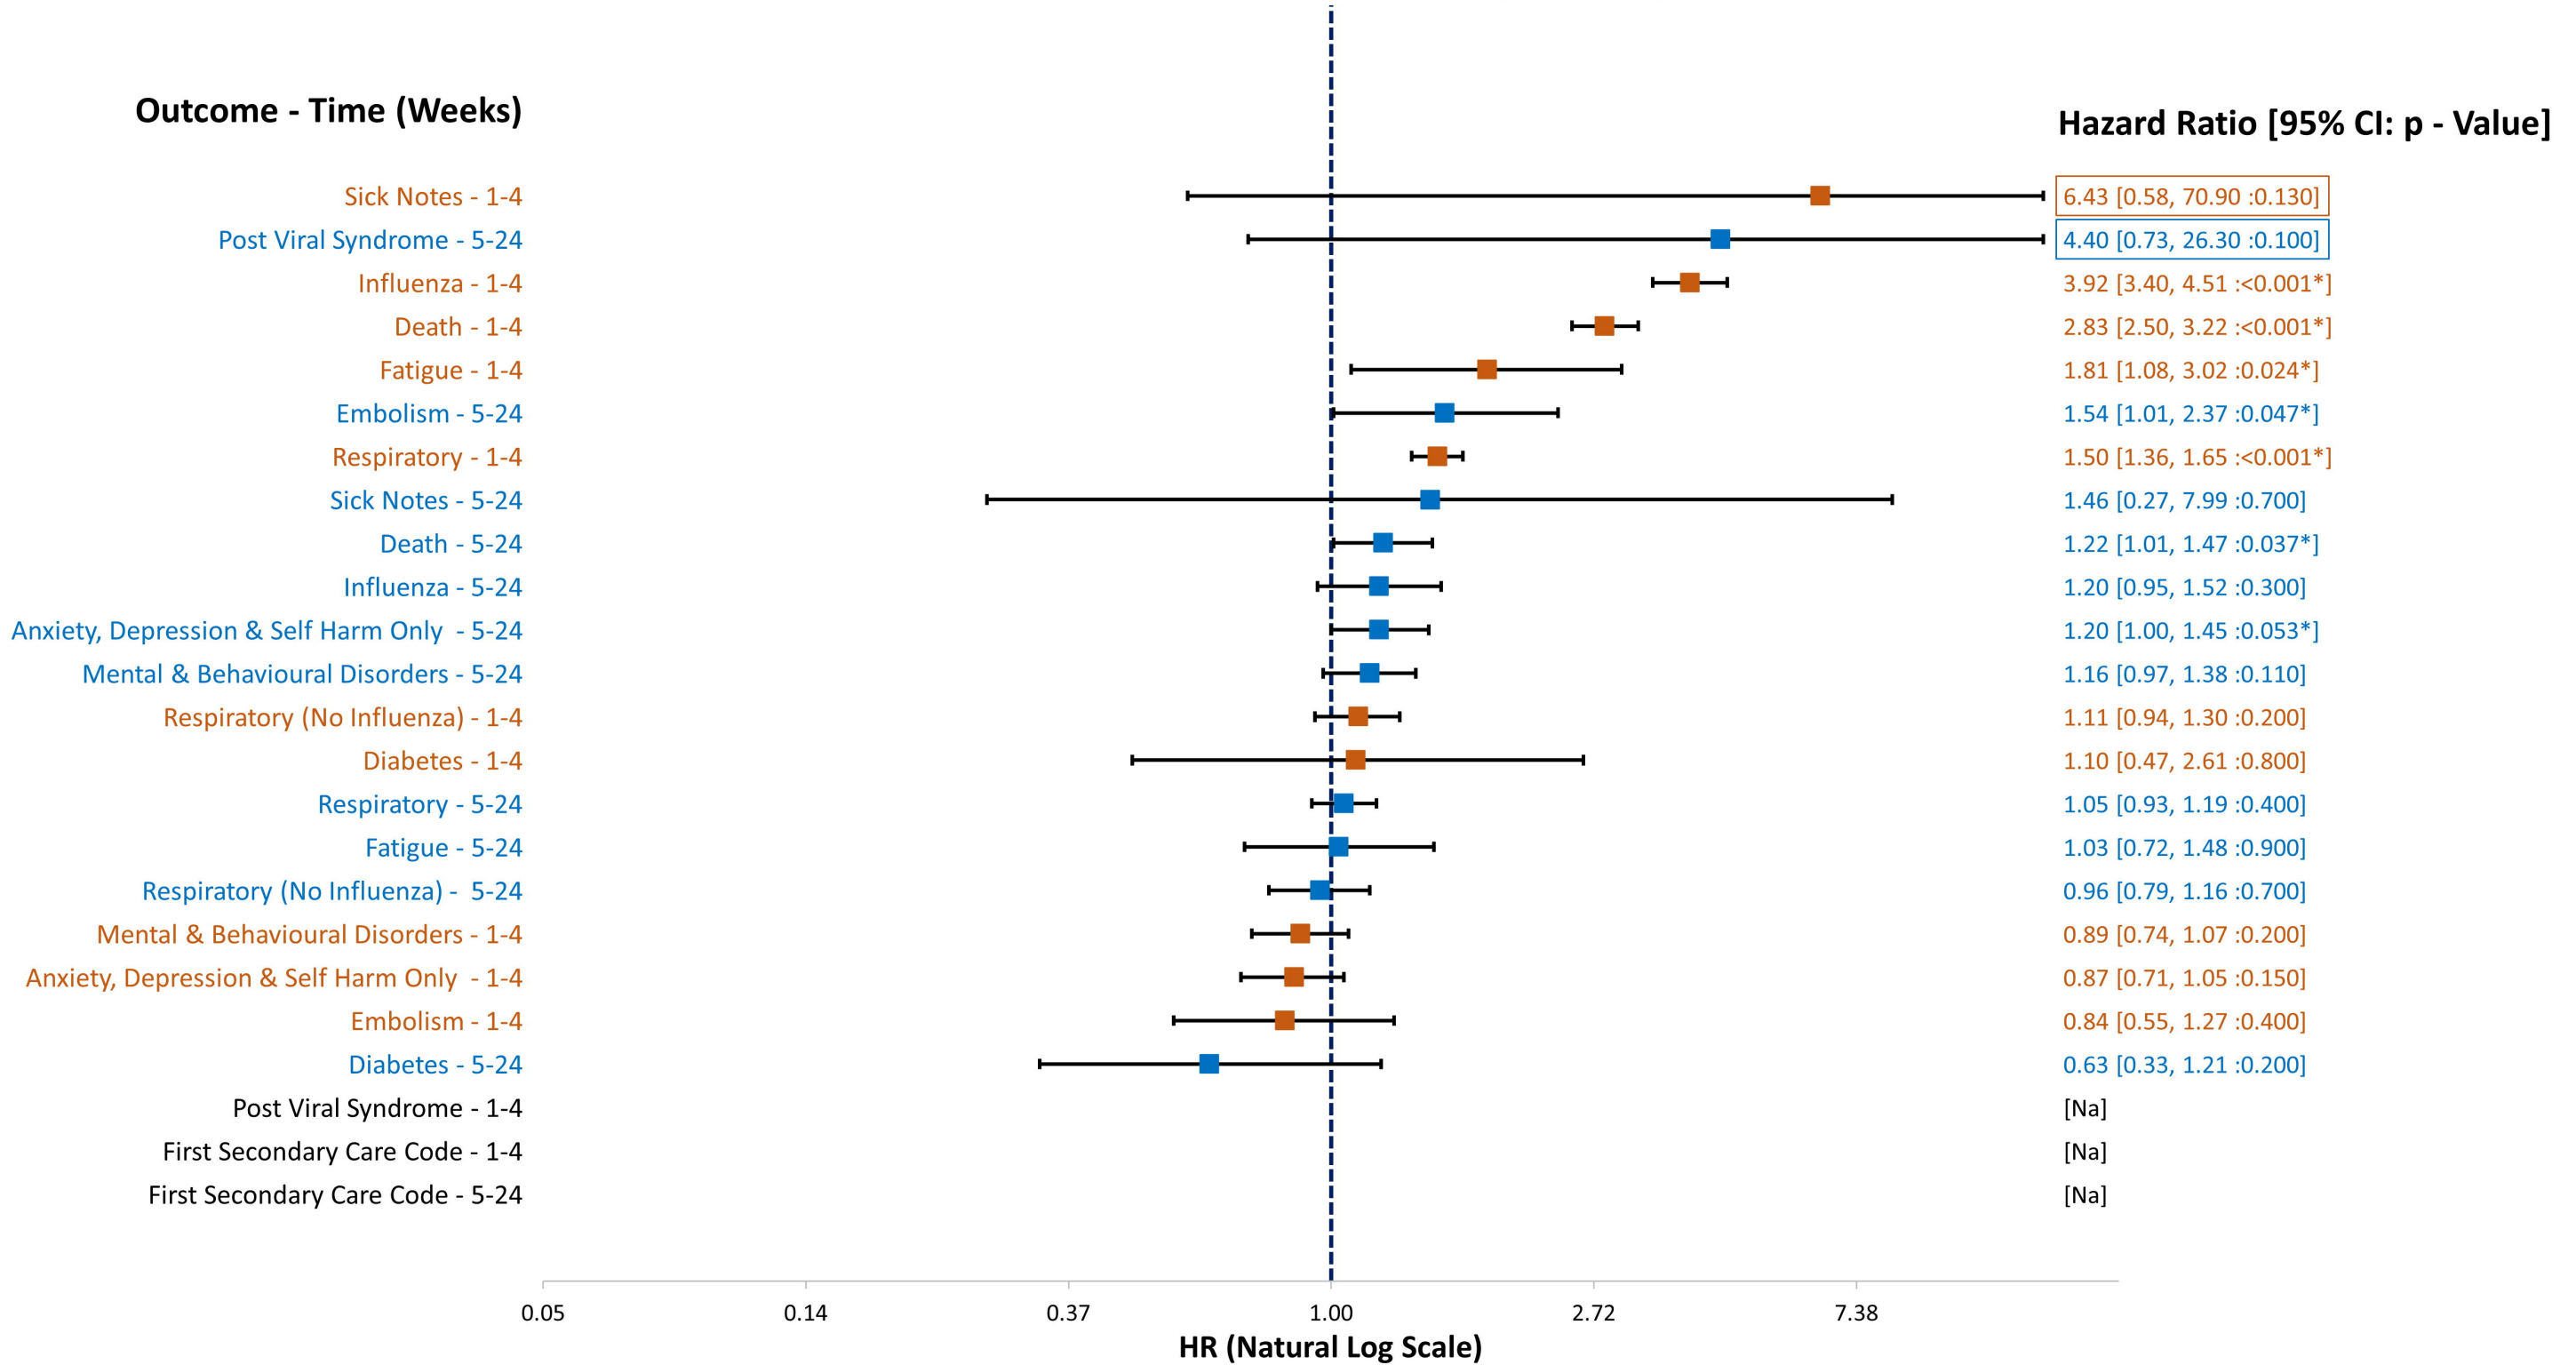



# Hazard Ratio for First Outcome 1 - 4 and 5 - 24 Weeks Following the Index Date in the Untested Cohort (Reference: All Negative Tests)

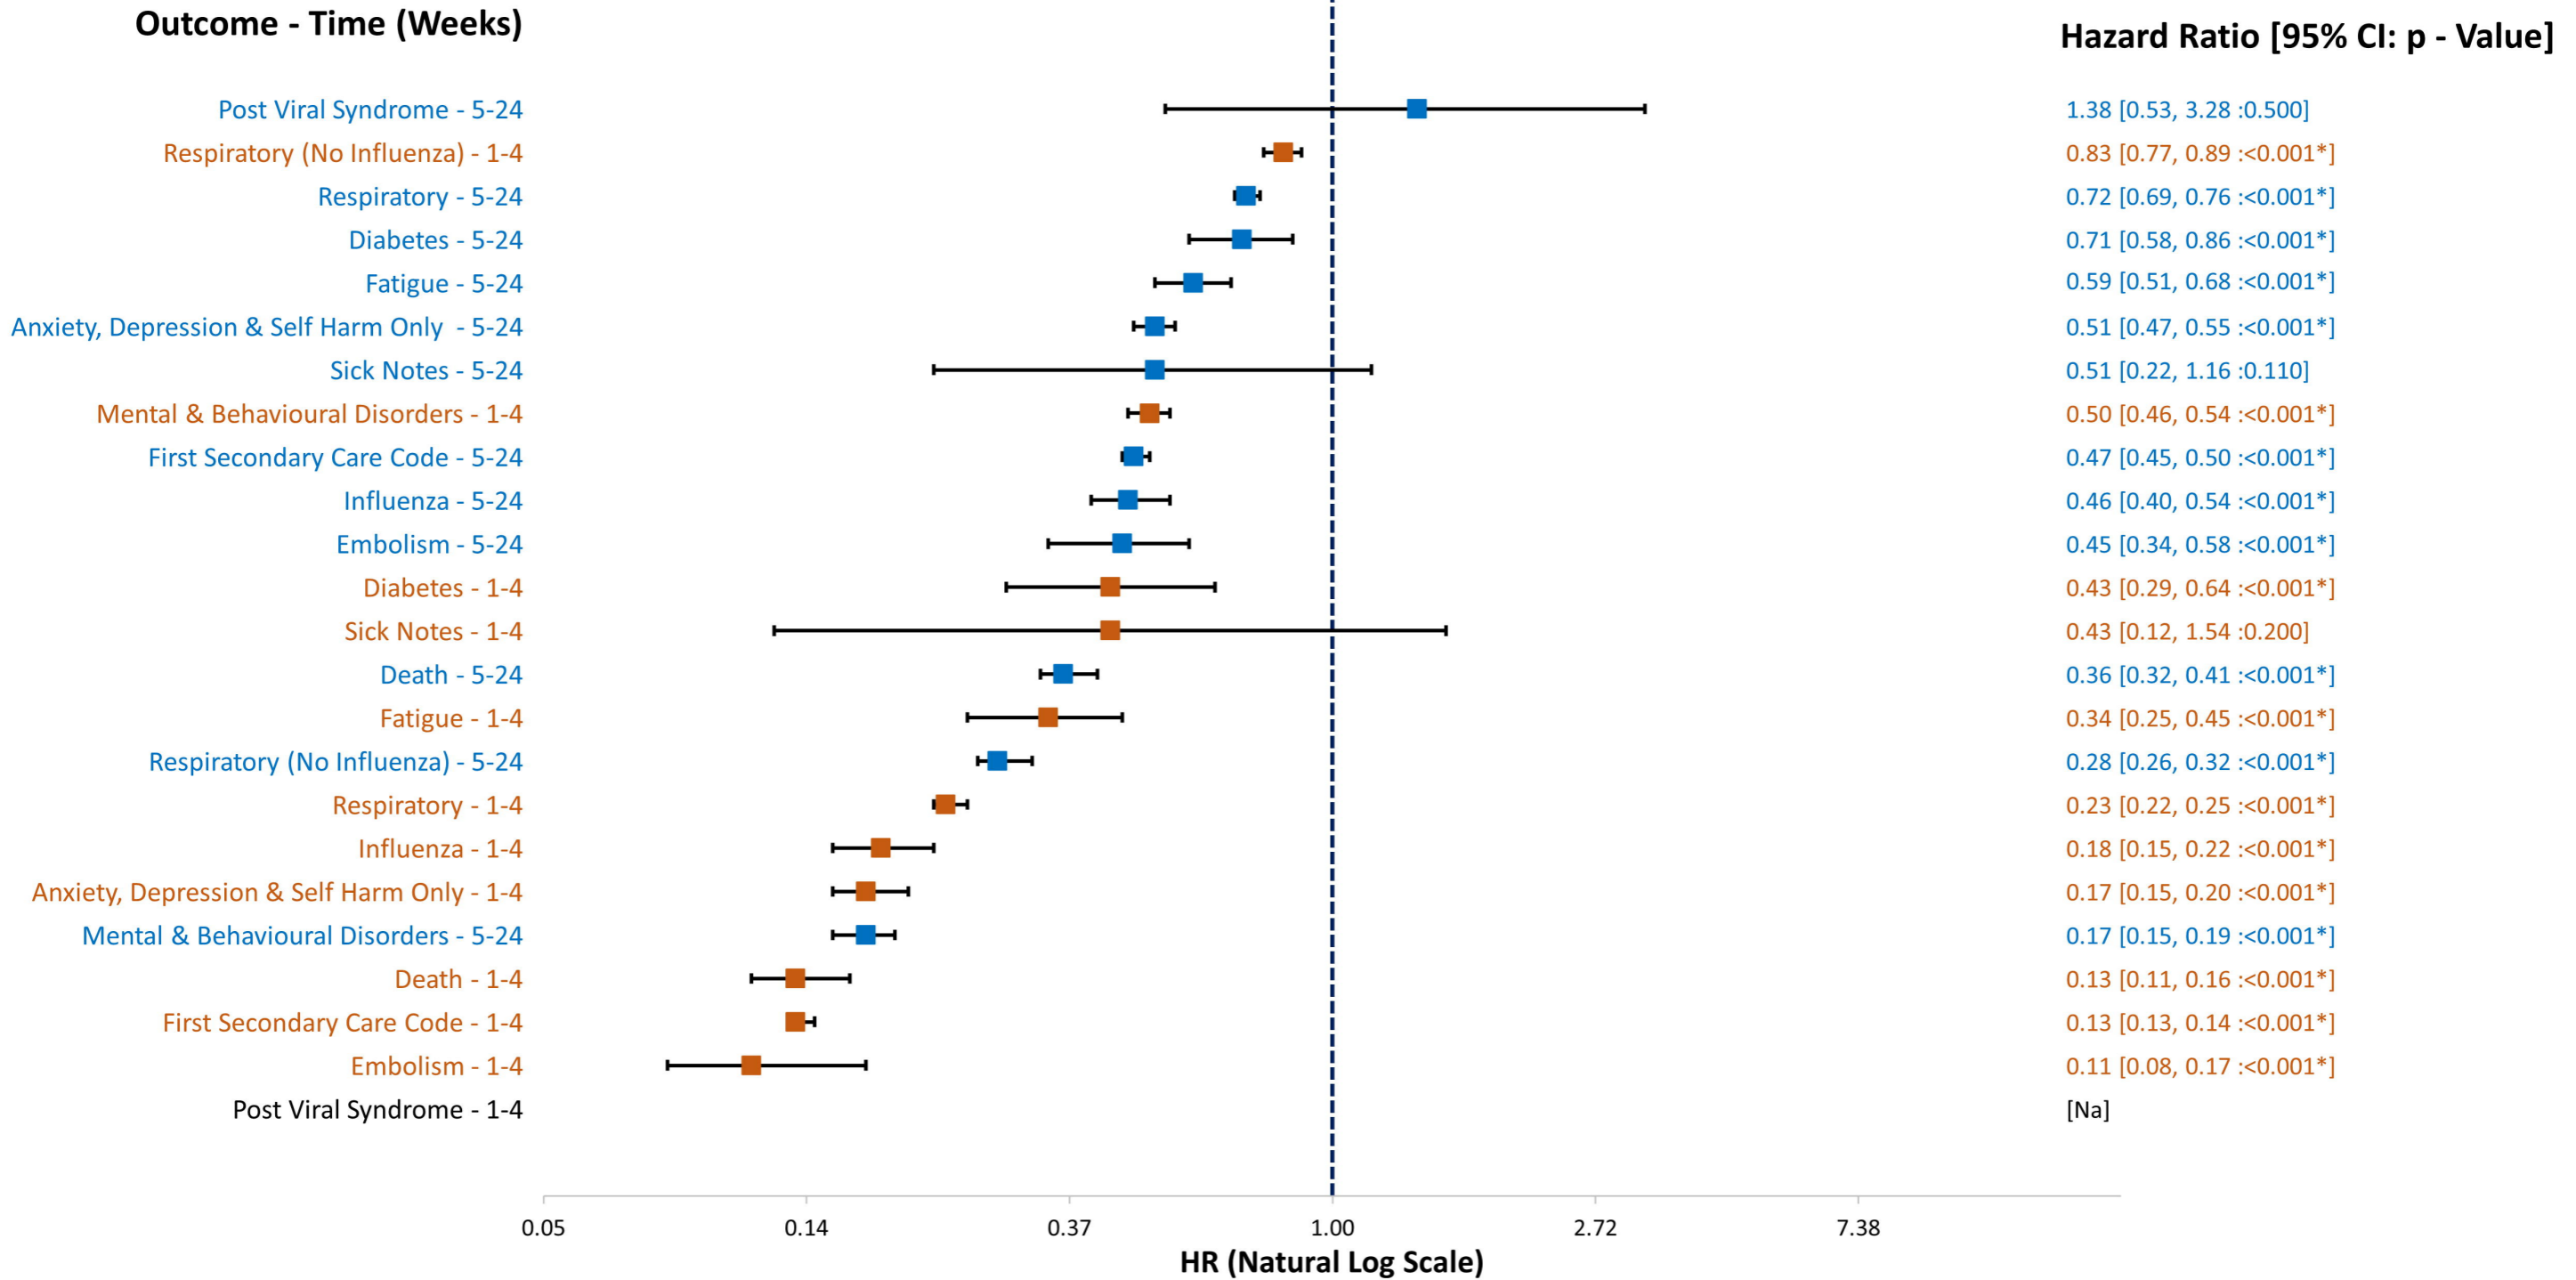



### Fatigue - All Locations

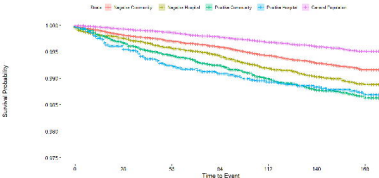

### Fatigue - All Locations

|                    | 0           | 20         | 40         | 60         | 80         | 100        | 120        | 140        | 160        |
|--------------------|-------------|------------|------------|------------|------------|------------|------------|------------|------------|
| Negative Community | 42690 (100) | 46052 (89) | 50291 (82) | 52439 (81) | 55960 (79) | 58775 (73) | 62211 (67) | 65758 (63) | 67211 (67) |
| Negative Hospital  | 18705 (100) | 15580 (83) | 14337 (76) | 13005 (70) | 11990 (64) | 10867 (58) | 10054 (54) | 9504 (51)  | 9054 (48)  |
| Positive Community | 17617 (100) | 15321 (87) | 14164 (80) | 13233 (75) | 12001 (68) | 10491 (60) | 9566 (54)  | 8811 (50)  | 8266 (47)  |
| Positive Hospital  | 5475 (100)  | 4718 (86)  | 4515 (82)  | 4425 (81)  | 4326 (79)  | 4198 (77)  | 3985 (73)  | 3885 (71)  | 3885 (71)  |
| General Population | 82162 (100) | 91273 (89) | 97648 (89) | 95661 (87) | 89889 (77) | 82113 (67) | 74275 (60) | 68113 (58) | 64211 (53) |

### Embolism - All Locations

■ None ■ Negative Community ■ Negative Hospital ■ Positive Community ■ Positive Hospital ■ General Population

Survival Probability

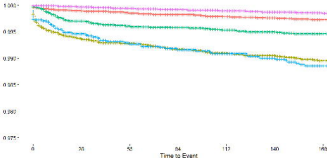

### Embolism - All Locations

Survival Probability

|                    | 0           | 20         | 40         | 64         | 112        | 140        | 160        |
|--------------------|-------------|------------|------------|------------|------------|------------|------------|
| Negative Community | 12690 (100) | 46421 (88) | 52465 (82) | 42516 (81) | 41763 (79) | 38944 (76) | 37167 (71) |
| Negative Hospital  | 18707 (100) | 15112 (80) | 14381 (78) | 13004 (90) | 12507 (84) | 12885 (78) | 12058 (77) |
| Positive Community | 17617 (100) | 15320 (87) | 14581 (82) | 13250 (91) | 12791 (89) | 13002 (73) | 12079 (72) |
| Positive Hospital  | 5429 (100)  | 4715 (87)  | 4519 (83)  | 4426 (82)  | 4037 (90)  | 4166 (77)  | 3987 (74)  |
| General Population | 82462 (100) | 94219 (86) | 87621 (86) | 85482 (78) | 82885 (77) | 80356 (77) | 78546 (80) |

|                                | Case (+ ve test) |               | Control (- ve test) |                | Control             |
|--------------------------------|------------------|---------------|---------------------|----------------|---------------------|
|                                | Community        | Hospital      | Community           | Hospital       | Untested            |
| Total, n (%)                   | 17,584 (24.97)   | 5,431 (24.50) | 52,834 (75.03)      | 16,732 (75.50) | 109,182<br>(100.00) |
| Males, n (%)                   | 8,222 (46.76)    | 2,770 (51.00) | 24,856 (47.05)      | 8,361 (49.97)  | 54,435<br>(49.86)   |
| WIMD Score 1 or<br>2, n (%)    | 3,945 (22.44)    | 1,233 (22.70) | 11,862 (22.45)      | 3,441 (20.56)  | 21,694<br>(19.87)   |
| Mean Age (Years<br>(Std.D))    | 42.56 (23.47)    | 51.90 (25.83) | 42.74 (23.56)       | 50.66 (22.92)  | 43.17<br>(23.95)    |
| Mean Charlson<br>Index (Std.D) | 0.60 (1.00)      | 1.13 (1.53)   | 0.55 (1.01)         | 1.03 (1.47)    | 0.53 (0.89)         |

|                                                 | <i>Time<br/>(Weeks)</i>             | <i>1 - 4</i>         | <i>5 - 8</i>         | <i>9 - 12</i>        | <i>13 - 16</i>       | <i>17 - 20</i>       | <i>21 - 24</i>       |
|-------------------------------------------------|-------------------------------------|----------------------|----------------------|----------------------|----------------------|----------------------|----------------------|
| <b>Embolism</b>                                 | Community<br>(Ref: -ve<br>Test)     | 2.78 [1.89,<br>4.09] | 2.19 [1.07,<br>4.47] | 1.36 [0.47,<br>3.92] | 1.10 [0.46,<br>2.61] | 1.48 [0.51,<br>4.34] | 0.98 [0.32,<br>3.04] |
|                                                 | Hospital<br>(Ref: -ve<br>Test)      | 0.83 [0.55,<br>1.26] | 2.40 [1.01,<br>5.70] | 1.06 [0.38,<br>2.90] | 0.86 [0.24,<br>3.07] | 2.08 [0.59,<br>7.36] | 1.55 [0.58,<br>4.12] |
|                                                 | Untested<br>(Ref: -ve<br>Test Comm) | 0.25 [0.16,<br>0.40] | 0.77 [0.40,<br>1.49] | 0.77 [0.28,<br>2.08] | 0.50 [0.21,<br>1.18] | 0.95 [0.35,<br>2.54] | 0.71 [0.24,<br>2.10] |
| <b>Diabetes</b>                                 | Community                           | 0.57 [0.27,<br>1.22] | 1.58 [0.81,<br>3.08] | 0.46 [0.19,<br>1.09] | 1.11 [0.52,<br>2.40] | 1.75 [0.88,<br>3.47] | 1.28 [0.61,<br>2.68] |
|                                                 | Hospital                            | 1.08 [0.46,<br>2.55] | 0.23 [0.03,<br>1.74] | 0.53 [0.12,<br>2.36] | 0.31 [0.04,<br>2.45] | 1.95 [0.64,<br>5.94] | 0.62 [0.14,<br>2.82] |
|                                                 | Untested                            | 0.47 [0.22,<br>1.01] | 0.69 [0.37,<br>1.31] | 0.56 [0.24,<br>1.32] | 0.91 [0.45,<br>1.87] | 1.11 [0.60,<br>2.05] | 0.85 [0.42,<br>1.70] |
| <b>Fatigue</b>                                  | Community                           | 1.74 [1.25,<br>2.44] | 2.14 [1.40,<br>3.28] | 1.72 [1.07,<br>2.77] | 1.58 [1.06,<br>2.36] | 1.54 [0.99,<br>2.39] | 1.14 [0.67,<br>1.94] |
|                                                 | Hospital                            | 1.77 [1.06,<br>2.96] | 1.73 [0.91,<br>3.31] | 1.01 [0.43,<br>2.36] | 0.69 [0.30,<br>1.56] | 0.59 [0.20,<br>1.73] | 0.98 [0.39,<br>2.45] |
|                                                 | Untested                            | 0.36 [0.25,<br>0.51] | 0.59 [0.39,<br>0.89] | 0.76 [0.49,<br>1.18] | 0.60 [0.41,<br>0.89] | 0.59 [0.38,<br>0.90] | 0.74 [0.45,<br>1.23] |
| <b>Mental and<br/>Behavioural<br/>Disorders</b> | Community                           | 0.79 [0.66,<br>0.93] | 0.96 [0.73,<br>1.25] | 1.01 [0.76,<br>1.34] | 0.91 [0.68,<br>1.21] | 0.91 [0.68,<br>1.22] | 0.72 [0.50,<br>1.04] |
|                                                 | Hospital                            | 0.89 [0.74,<br>1.06] | 1.17 [0.82,<br>1.67] | 0.98 [0.64,<br>1.50] | 0.80 [0.48,<br>1.31] | 1.41 [0.87,<br>2.28] | 1.47 [0.87,<br>2.51] |
|                                                 | Untested                            | 0.24 [0.20,<br>0.29] | 0.60 [0.46,<br>0.78] | 0.65 [0.49,<br>0.86] | 0.59 [0.45,<br>0.79] | 0.44 [0.33,<br>0.60] | 0.59 [0.41,<br>0.85] |
| <b>Anxiety,<br/>Depression</b>                  | Community                           | 0.81 [0.68,<br>0.97] | 0.91 [0.69,<br>1.21] | 1.08 [0.81,<br>1.44] | 0.96 [0.71,<br>1.28] | 0.87 [0.64,<br>1.17] | 0.70 [0.48,<br>1.02] |

|                                                      |           |                     |                   |                   |                   |                   |                   |
|------------------------------------------------------|-----------|---------------------|-------------------|-------------------|-------------------|-------------------|-------------------|
| <b>&amp; Self Harm</b>                               | Hospital  | 0.86 [0.71, 1.05]   | 1.20 [0.83, 1.74] | 1.13 [0.74, 1.75] | 0.76 [0.46, 1.28] | 1.32 [0.80, 2.17] | 1.63 [0.95, 2.80] |
|                                                      | Untested  | 0.24 [0.20, 0.29]   | 0.59 [0.45, 0.77] | 0.65 [0.49, 0.86] | 0.61 [0.46, 0.81] | 0.45 [0.33, 0.61] | 0.59 [0.41, 0.85] |
| <b>Respiratory</b>                                   | Community | 1.56 [1.43, 1.70]   | 0.84 [0.69, 1.02] | 1.09 [0.90, 1.33] | 0.98 [0.80, 1.21] | 1.06 [0.85, 1.32] | 0.84 [0.66, 1.08] |
|                                                      | Hospital  | 1.47 [1.34, 1.61]   | 1.11 [0.86, 1.44] | 0.82 [0.60, 1.14] | 1.17 [0.83, 1.65] | 1.07 [0.74, 1.54] | 0.71 [0.45, 1.11] |
|                                                      | Untested  | 0.35 [0.32, 0.39]   | 0.88 [0.73, 1.06] | 0.90 [0.75, 1.09] | 0.87 [0.72, 1.06] | 0.91 [0.74, 1.12] | 0.84 [0.67, 1.06] |
| <b>Respiratory (No Influenza)</b>                    | Community | 1.03 [0.87, 1.22]   | 0.77 [0.57, 1.05] | 1.17 [0.87, 1.57] | 0.97 [0.70, 1.34] | 1.01 [0.71, 1.42] | 0.66 [0.44, 0.99] |
|                                                      | Hospital  | 1.10 [0.93, 1.29]   | 0.99 [0.65, 1.50] | 0.78 [0.48, 1.27] | 0.94 [0.53, 1.67] | 1.49 [0.90, 2.47] | 0.40 [0.18, 0.88] |
|                                                      | Untested  | 0.44 [0.37, 0.52]   | 0.95 [0.71, 1.27] | 1.13 [0.86, 1.47] | 0.99 [0.73, 1.35] | 1.12 [0.81, 1.55] | 1.03 [0.71, 1.52] |
| <b>Influenza</b>                                     | Community | 10.15 [8.40, 12.26] | 0.47 [0.23, 0.95] | 0.43 [0.18, 1.00] | 0.40 [0.16, 1.01] | 0.30 [0.09, 0.99] | 0.88 [0.33, 2.39] |
|                                                      | Hospital  | 3.78 [3.29, 4.34]   | 1.02 [0.65, 1.61] | 1.01 [0.56, 1.84] | 0.82 [0.40, 1.71] | 0.95 [0.41, 2.21] | 1.62 [0.73, 3.61] |
|                                                      | Untested  | 0.47 [0.39, 0.57]   | 0.77 [0.39, 1.53] | 0.80 [0.35, 1.84] | 0.86 [0.35, 2.15] | 0.78 [0.24, 2.51] | 0.94 [0.37, 2.41] |
| <b>First Hospital Code (Hospital Tested Removed)</b> | Community | 0.75 [0.69, 0.81]   | 1.00 [0.82, 1.23] | 0.84 [0.66, 1.07] | 1.01 [0.79, 1.29] | 0.93 [0.71, 1.22] | 0.69 [0.50, 0.94] |
|                                                      | Hospital  | [Removed]           |                   |                   |                   |                   |                   |
|                                                      | Untested  | 0.14 [0.12, 0.15]   | 0.77 [0.63, 0.93] | 0.83 [0.66, 1.04] | 0.95 [0.76, 1.20] | 0.94 [0.73, 1.21] | 0.83 [0.61, 1.12] |
| <b>Death</b>                                         | Community | 4.06 [3.35, 4.92]   | 0.81 [0.56, 1.15] | 0.79 [0.50, 1.24] | 0.52 [0.29, 0.94] | 0.42 [0.23, 0.76] | 0.31 [0.13, 0.72] |

|  |          |                   |                   |                   |                   |                   |                   |
|--|----------|-------------------|-------------------|-------------------|-------------------|-------------------|-------------------|
|  | Hospital | 2.77 [2.45, 3.14] | 1.17 [0.89, 1.52] | 0.99 [0.67, 1.45] | 0.71 [0.44, 1.14] | 0.98 [0.57, 1.69] | 0.82 [0.45, 1.51] |
|  | Untested | 0.38 [0.31, 0.47] | 0.46 [0.32, 0.66] | 0.61 [0.39, 0.95] | 0.62 [0.35, 1.11] | 0.45 [0.25, 0.83] | 0.54 [0.24, 1.26] |

|                  | <b><i>Test Location</i></b> |                 |
|------------------|-----------------------------|-----------------|
| <b>Test Site</b> | <b>Community</b>            | <b>Hospital</b> |
|                  | Care Home                   | AE              |
|                  | Community Unit              | Hospital        |
|                  | Covid Unit                  | ICU             |
|                  | CTU                         | Outpatient      |
|                  | GP                          | Hospice         |
|                  | HC Staff                    |                 |
|                  | Police                      |                 |
|                  | Prison                      |                 |
|                  | Self-Home Test              |                 |



| Outcome                                | Codes        |                | Notes                                                                       |
|----------------------------------------|--------------|----------------|-----------------------------------------------------------------------------|
|                                        | Primary Care | Secondary Care |                                                                             |
| Diabetes                               | ✓            | ✗              | Only Primary Care                                                           |
| Embolism                               | ✓            | ✓              |                                                                             |
| Fatigue                                | ✓            | ✗              | Only Primary Care                                                           |
| Influenza (Only)                       | ✗            | ✓              | Only Secondary Care                                                         |
| Mental and Behavioural Disorders       | ✓            | ✓              | Anxiety, Depression, OCD, Schizophrenia, ADHD, Bipolar, Autism, Self-Harm   |
| Anxiety, Depression and Self Harm Only | ✓            | ✓              |                                                                             |
| Post Viral Syndrome                    | ✓            | ✗              | Only Primary Care                                                           |
| Respiratory (All)                      | ✓            | ✓              | General Respiratory, Mastoid, Upper and Lower Respiratory Infection, Asthma |
| Respiratory (Influenza Removed)        | ✓            | ✓              |                                                                             |
| Sick Notes                             | ✓            | ✗              | Only Primary Care                                                           |

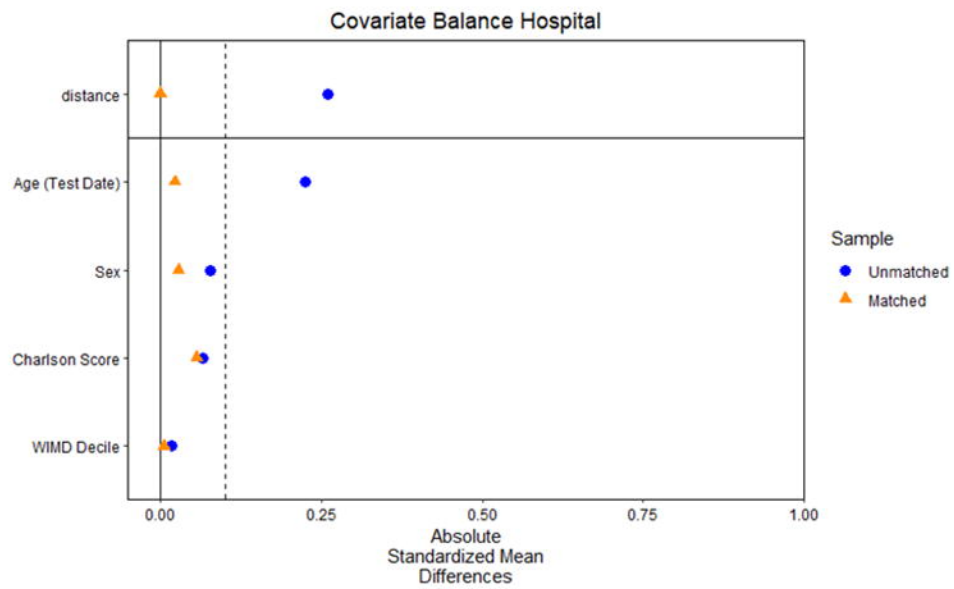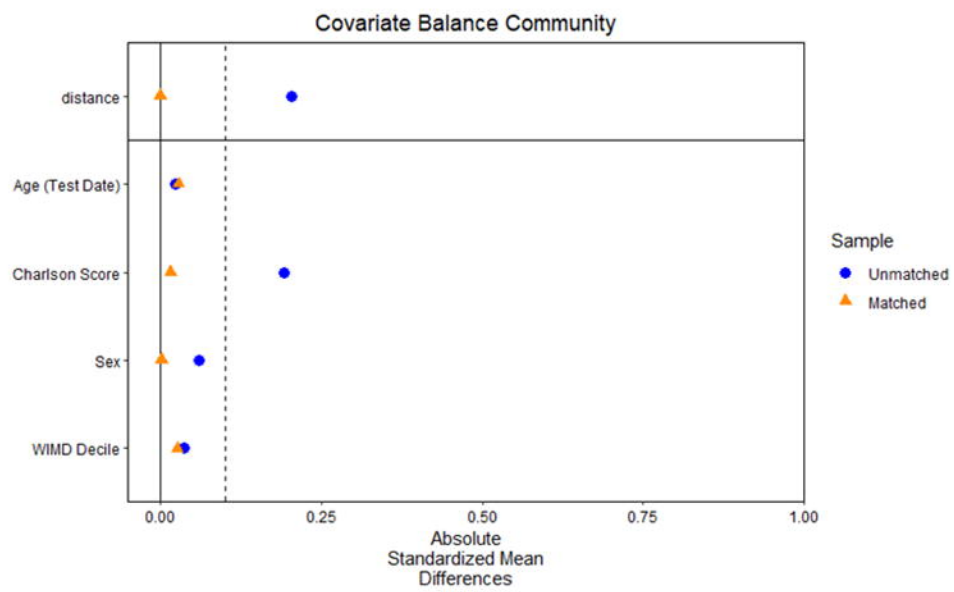

**Deaths/100,000**

| <b>Time (Weeks)</b> | <b>1-4</b> | <b>5-8</b> | <b>9-12</b> | <b>13-16</b> | <b>17-20</b> | <b>21-24</b> |
|---------------------|------------|------------|-------------|--------------|--------------|--------------|
| <b>Negative</b>     | 980.36     | 557.53     | 344.63      | 294.23       | 250.13       | 199.08       |
| <b>Positive</b>     | 3019.77    | 552.76     | 303.06      | 180.42       | 156.34       | 106.11       |
| <b>Untested</b>     | 128.23     | 140.55     | 127.75      | 107.39       | 91.89        | 77.29        |

| <b>Code</b> | <b>Description</b>                                           | <b>Class</b> | <b>Code type</b> |
|-------------|--------------------------------------------------------------|--------------|------------------|
| C1061       | Diabetes mellitus, adult onset, + neurological manifestation | Diabetes     | Read             |
| C1096       | Type II diabetes mellitus with retinopathy                   | Diabetes     | Read             |
| C10K0       | Type A insulin resistance without complication               | Diabetes     | Read             |
| C109.       | Type II diabetes mellitus                                    | Diabetes     | Read             |
| C109.       | Type 2 diabetes mellitus                                     | Diabetes     | Read             |
| C104.       | Diabetes mellitus with renal manifestation                   | Diabetes     | Read             |
| C10F<br>Q   | Type 2 diabetes mellitus with exudative maculopathy          | Diabetes     | Read             |
| C109.       | NIDDM - Non-insulin dependent diabetes mellitus              | Diabetes     | Read             |
| C10D.       | Maturity onset diabetes in youth type 2                      | Diabetes     | Read             |
| C10F1       | Type II diabetes mellitus with ophthalmic complications      | Diabetes     | Read             |
| C109F       | Non-insulin-dependent d m with peripheral angiopath          | Diabetes     | Read             |
| C10F9       | Type II diabetes mellitus without complication               | Diabetes     | Read             |
| C10A<br>1   | Malnutrition-related diabetes mellitus with ketoacidosis     | Diabetes     | Read             |
| C10FA       | Type II diabetes mellitus with mononeuropathy                | Diabetes     | Read             |
| C1001       | Maturity onset diabetes                                      | Diabetes     | Read             |
| C105y       | Other specified diabetes mellitus with ophthalmic complicatn | Diabetes     | Read             |
| C1001       | Non-insulin dependent diabetes mellitus                      | Diabetes     | Read             |
| C1072       | Diabetes mellitus, adult with gangrene                       | Diabetes     | Read             |
| C1095       | Non-insulin dependent diabetes mellitus with gangrene        | Diabetes     | Read             |
| C10FJ       | Insulin treated Type II diabetes mellitus                    | Diabetes     | Read             |
| C104.       | Diabetic nephropathy                                         | Diabetes     | Read             |
| C10FR       | Type II diabetes mellitus with gastroparesis                 | Diabetes     | Read             |
| C10z.       | Diabetes mellitus with unspecified complication              | Diabetes     | Read             |
| C109F       | Type 2 diabetes mellitus with peripheral angiopathy          | Diabetes     | Read             |
| C10D.       | Diabetes mellitus autosomal dominant type 2                  | Diabetes     | Read             |
| C10F1       | Type 2 diabetes mellitus with ophthalmic complications       | Diabetes     | Read             |
| C109F       | Type II diabetes mellitus with peripheral angiopathy         | Diabetes     | Read             |
| C10F9       | Type 2 diabetes mellitus without complication                | Diabetes     | Read             |
| C10FA       | Type 2 diabetes mellitus with mononeuropathy                 | Diabetes     | Read             |
| C106z       | Diabetes mellitus NOS with neurological manifestation        | Diabetes     | Read             |
| C1096       | Type 2 diabetes mellitus with retinopathy                    | Diabetes     | Read             |
| C1095       | Type II diabetes mellitus with gangrene                      | Diabetes     | Read             |
| C10FH       | Type 2 diabetes mellitus with neuropathic arthropathy        | Diabetes     | Read             |
| C1095       | Type 2 diabetes mellitus with gangrene                       | Diabetes     | Read             |
| C10FP       | Type 2 diabetes mellitus with ketoacidotic coma              | Diabetes     | Read             |
| C10F0       | Type II diabetes mellitus with renal complications           | Diabetes     | Read             |
| C101z       | Diabetes mellitus NOS with ketoacidosis                      | Diabetes     | Read             |
| C109E       | Non-insulin depend diabetes mellitus with diabetic cataract  | Diabetes     | Read             |
| C10A        | Malnutrition-related diabetes mellitus with coma             | Diabetes     | Read             |

|       |                                                              |          |      |
|-------|--------------------------------------------------------------|----------|------|
| 0     |                                                              |          |      |
| C10F8 | Metabolic syndrome X                                         | Diabetes | Read |
| C1011 | Diabetes mellitus, adult onset, with ketoacidosis            | Diabetes | Read |
| C1071 | Diabetes mellitus, adult, + peripheral circulatory disorder  | Diabetes | Read |
| C1094 | Non-insulin dependent diabetes mellitus with ulcer           | Diabetes | Read |
| C10J. | Insulin autoimmune syndrome                                  | Diabetes | Read |
| C105. | Diabetes mellitus with ophthalmic manifestation              | Diabetes | Read |
| C10F  | Type II diabetes mellitus with exudative maculopathy         | Diabetes | Read |
| Q     |                                                              |          |      |
| C10F0 | Type 2 diabetes mellitus with renal complications            | Diabetes | Read |
| C109E | Type II diabetes mellitus with diabetic cataract             | Diabetes | Read |
| C10F8 | Reaven's syndrome                                            | Diabetes | Read |
| C109E | Type 2 diabetes mellitus with diabetic cataract              | Diabetes | Read |
| C106y | Other specified diabetes mellitus with neurological comps    | Diabetes | Read |
| C10FK | Hyperosmolar non-ketotic state in type 2 diabetes mellitus   | Diabetes | Read |
| C1090 | Type 2 diabetes mellitus with renal complications            | Diabetes | Read |
| C1090 | Type II diabetes mellitus with renal complications           | Diabetes | Read |
| C10FS | Maternally inherited diabetes mellitus                       | Diabetes | Read |
| C10F3 | Type II diabetes mellitus with multiple complications        | Diabetes | Read |
| C10y. | Diabetes mellitus with other specified manifestation         | Diabetes | Read |
| C109  | Non-insulin dependent d m with neuropathic arthropathy       | Diabetes | Read |
| H     |                                                              |          |      |
| C10C. | Diabetes mellitus autosomal dominant                         | Diabetes | Read |
| C10A  | Malnutrit-related diabetes mellitus wth ophthalmic complicat | Diabetes | Read |
| 3     |                                                              |          |      |
| C10FC | Type II diabetes mellitus with nephropathy                   | Diabetes | Read |
| C10zy | Other specified diabetes mellitus with unspecified comps     | Diabetes | Read |
| C1098 | Reaven's syndrome                                            | Diabetes | Read |
| C1051 | Diabetes mellitus, adult onset, + ophthalmic manifestation   | Diabetes | Read |
| C1074 | NIDDM with peripheral circulatory disorder                   | Diabetes | Read |
| C10FD | Type II diabetes mellitus with hypoglycaemic coma            | Diabetes | Read |
| C103. | Diabetes mellitus with ketoacidotic coma                     | Diabetes | Read |
| C109  | Type 2 diabetes mellitus with neuropathic arthropathy        | Diabetes | Read |
| H     |                                                              |          |      |
| C10ER | Latent autoimmune diabetes mellitus in adult                 | Diabetes | Read |
| C10F3 | Type 2 diabetes mellitus with multiple complications         | Diabetes | Read |
| C10FL | Type II diabetes mellitus with persistent proteinuria        | Diabetes | Read |
| C10H. | Diabetes mellitus induced by non-steroid drugs               | Diabetes | Read |
| C109  | Type II diabetes mellitus with neuropathic arthropathy       | Diabetes | Read |
| H     |                                                              |          |      |
| C104y | Other specified diabetes mellitus with renal complications   | Diabetes | Read |
| C10FC | Type 2 diabetes mellitus with nephropathy                    | Diabetes | Read |
| C10FJ | Insulin treated Type 2 diabetes mellitus                     | Diabetes | Read |

|        |                                                              |          |      |
|--------|--------------------------------------------------------------|----------|------|
| C10FR  | Type 2 diabetes mellitus with gastroparesis                  | Diabetes | Read |
| C10P1  | Type 2 diabetes mellitus in remission                        | Diabetes | Read |
| C10F2  | Type II diabetes mellitus with neurological complications    | Diabetes | Read |
| C109 G | Non-insulin dependent diabetes mellitus with arthropathy     | Diabetes | Read |
| C10A 2 | Malnutrition-related diabetes mellitus with renal complicatn | Diabetes | Read |
| C105z  | Diabetes mellitus NOS with ophthalmic manifestation          | Diabetes | Read |
| C10FB  | Type II diabetes mellitus with polyneuropathy                | Diabetes | Read |
| C1097  | Non-insulin dependent diabetes mellitus - poor control       | Diabetes | Read |
| C1096  | Non-insulin-dependent diabetes mellitus with retinopathy     | Diabetes | Read |
| C10FK  | Hyperosmolar non-ketotic state in type II diabetes mellitus  | Diabetes | Read |
| C10N.  | Secondary diabetes mellitus                                  | Diabetes | Read |
| C109.  | Non-insulin dependent diabetes mellitus                      | Diabetes | Read |
| C10P1  | Type II diabetes mellitus in remission                       | Diabetes | Read |
| C10F2  | Type 2 diabetes mellitus with neurological complications     | Diabetes | Read |
| C10J0  |                                                              | Diabetes | Read |
| C109 G |                                                              | Diabetes | Read |
| C109 G | Type 2 diabetes mellitus with arthropathy                    | Diabetes | Read |
| C10C.  | Maturity onset diabetes in youth                             | Diabetes | Read |
| C100z  | Diabetes mellitus NOS with no mention of complication        | Diabetes | Read |
| C10..  | Diabetes mellitus                                            | Diabetes | Read |
| C1001  | Diabetes mellitus, adult onset, no mention of complication   | Diabetes | Read |
| C10FB  | Type 2 diabetes mellitus with polyneuropathy                 | Diabetes | Read |
| C1097  | Type II diabetes mellitus - poor control                     | Diabetes | Read |
| C1097  | Type 2 diabetes mellitus - poor control                      | Diabetes | Read |
| C1092  | Type 2 diabetes mellitus with neurological complications     | Diabetes | Read |
| C1092  | Type II diabetes mellitus with neurological complications    | Diabetes | Read |
| C10FE  | Type 2 diabetes mellitus with diabetic cataract              | Diabetes | Read |
| C109J  | Insulin treated Type 2 diabetes mellitus                     | Diabetes | Read |
| C10F M | Type 2 diabetes mellitus with persistent microalbuminuria    | Diabetes | Read |
| C10G.  | Secondary pancreatic diabetes mellitus                       | Diabetes | Read |
| C10F5  | Type II diabetes mellitus with gangrene                      | Diabetes | Read |
| C103z  | Diabetes mellitus NOS with ketoacidotic coma                 | Diabetes | Read |
| C109B  | Non-insulin dependent diabetes mellitus with polyneuropathy  | Diabetes | Read |
| C10A 5 | Malnutritn-relat diabetes melitus wth periph circul complctn | Diabetes | Read |
| C1031  | Diabetes mellitus, adult onset, with ketoacidotic coma       | Diabetes | Read |
| C10L.  |                                                              | Diabetes | Read |
| C10N   | Cystic fibrosis related diabetes mellitus                    | Diabetes | Read |

|       |                                                                       |          |      |
|-------|-----------------------------------------------------------------------|----------|------|
| 1     |                                                                       |          |      |
| C107. | Diabetes mellitus with peripheral circulatory disorder                | Diabetes | Read |
| C109I | Non-insulin-dependent diabetes mellitus with ophthalmic complications | Diabetes | Read |
| C10FF | Type II diabetes mellitus with peripheral angiopathy                  | Diabetes | Read |
| C109J | Insulin treated Type II diabetes mellitus                             | Diabetes | Read |
| C109J | Insulin treated non-insulin dependent diabetes mellitus               | Diabetes | Read |
| C10A. |                                                                       | Diabetes | Read |
| C10FN | Type II diabetes mellitus with ketoacidosis                           | Diabetes | Read |
| C10HO | DM induced by non-steroid drugs without complication                  | Diabetes | Read |
| C109B | Type 2 diabetes mellitus with polyneuropathy                          | Diabetes | Read |
| C10F5 | Type 2 diabetes mellitus with gangrene                                | Diabetes | Read |
| C109B | Type II diabetes mellitus with polyneuropathy                         | Diabetes | Read |
| C108y | Other specified diabetes mellitus with multiple complications         | Diabetes | Read |
| C10yz | Diabetes mellitus NOS with other specified manifestation              | Diabetes | Read |
| C102. | Diabetes mellitus with hyperosmolar coma                              | Diabetes | Read |
| C104I | Diabetes mellitus, adult onset, with renal manifestation              | Diabetes | Read |
| C107. | Diabetes mellitus with gangrene                                       | Diabetes | Read |
| C109I | Type II diabetes mellitus with ophthalmic complications               | Diabetes | Read |
| C10FD | Type 2 diabetes mellitus with hypoglycaemic coma                      | Diabetes | Read |
| C10M  | Lipoatrophic diabetes mellitus                                        | Diabetes | Read |
| C109I | Type 2 diabetes mellitus with ophthalmic complications                | Diabetes | Read |
| C107. | Diabetes with gangrene                                                | Diabetes | Read |
| C10FL | Type 2 diabetes mellitus with persistent proteinuria                  | Diabetes | Read |
| C10F4 | Type II diabetes mellitus with ulcer                                  | Diabetes | Read |
| C103y | Other specified diabetes mellitus with coma                           | Diabetes | Read |
| C109A | Non-insulin dependent diabetes mellitus with mononeuropathy           | Diabetes | Read |
| C10A4 |                                                                       | Diabetes | Read |
| C1099 | Non-insulin-dependent diabetes mellitus without complication          | Diabetes | Read |
| C10zz | Diabetes mellitus NOS with unspecified complication                   | Diabetes | Read |
| C10z1 | Diabetes mellitus, adult onset, + unspecified complication            | Diabetes | Read |
| C10NO | Secondary diabetes mellitus without complication                      | Diabetes | Read |
| C10FE | Type II diabetes mellitus with diabetic cataract                      | Diabetes | Read |
| C109O | Non-insulin-dependent diabetes mellitus with renal complications      | Diabetes | Read |
| C10B. | Diabetes mellitus induced by steroids                                 | Diabetes | Read |
| C10FM | Type II diabetes mellitus with persistent microalbuminuria            | Diabetes | Read |
| C10F4 | Type 2 diabetes mellitus with ulcer                                   | Diabetes | Read |

|           |                                                             |          |      |
|-----------|-------------------------------------------------------------|----------|------|
| C104z     | Diabetes mellitus with nephropathy NOS                      | Diabetes | Read |
| C109<br>A |                                                             | Diabetes | Read |
| C109<br>A |                                                             | Diabetes | Read |
| C1099     |                                                             | Diabetes | Read |
| C1099     | Type 2 diabetes mellitus without complication               | Diabetes | Read |
| C10yy     | Other specified diabetes mellitus with other spec comps     | Diabetes | Read |
| C1094     | Type 2 diabetes mellitus with ulcer                         | Diabetes | Read |
| C1094     | Type II diabetes mellitus with ulcer                        | Diabetes | Read |
| C10K.     | Type A insulin resistance                                   | Diabetes | Read |
| C10F<br>G | Type 2 diabetes mellitus with arthropathy                   | Diabetes | Read |
| C10G<br>0 | Secondary pancreatic diabetes mellitus without complication | Diabetes | Read |
| C101y     | Other specified diabetes mellitus with ketoacidosis         | Diabetes | Read |
| C109<br>D | Non-insulin dependent diabetes mellitus with hypoglyca coma | Diabetes | Read |
| C10F7     | Type II diabetes mellitus - poor control                    | Diabetes | Read |
| C10A<br>7 |                                                             | Diabetes | Read |
| C107z     | Diabetes mellitus NOS with peripheral circulatory disorder  | Diabetes | Read |
| C10FH     | Type II diabetes mellitus with neuropathic arthropathy      | Diabetes | Read |
| C10L0     |                                                             | Diabetes | Read |
| C1093     | Non-insulin-dependent diabetes mellitus with multiple comps | Diabetes | Read |
| C10FP     | Type II diabetes mellitus with ketoacidotic coma            | Diabetes | Read |
| C10P.     | Diabetes mellitus in remission                              | Diabetes | Read |
| C109<br>D | Type 2 diabetes mellitus with hypoglycaemic coma            | Diabetes | Read |
| C102z     | Diabetes mellitus NOS with hyperosmolar coma                | Diabetes | Read |
| C109<br>D | Type II diabetes mellitus with hypoglycaemic coma           | Diabetes | Read |
| C10F7     | Type 2 diabetes mellitus - poor control                     | Diabetes | Read |
| C100.     | Diabetes mellitus with no mention of complication           | Diabetes | Read |
| C1021     | Diabetes mellitus, adult onset, with hyperosmolar coma      | Diabetes | Read |
| C10A<br>X |                                                             | Diabetes | Read |
| C10y1     | Diabetes mellitus, adult, + other specified manifestation   | Diabetes | Read |
| C1093     | Type II diabetes mellitus with multiple complications       | Diabetes | Read |
| C10M<br>0 |                                                             | Diabetes | Read |
| C1093     | Type 2 diabetes mellitus with multiple complications        | Diabetes | Read |
| C106.     | Diabetes mellitus with neurological manifestation           | Diabetes | Read |
| C10FF     | Type 2 diabetes mellitus with peripheral angiopathy         | Diabetes | Read |
| C10F.     | Type II diabetes mellitus                                   | Diabetes | Read |



|           |                                                              |          |      |
|-----------|--------------------------------------------------------------|----------|------|
| C109K     | Hyperosmolar non-ketotic state in type 2 diabetes mellitus   | Diabetes | Read |
| C10A.     | Malnutrition-related diabetes mellitus                       | Diabetes | Read |
| C10F<br>N | Type 2 diabetes mellitus with ketoacidosis                   | Diabetes | Read |
| C109C     | Non-insulin dependent diabetes mellitus with nephropathy     | Diabetes | Read |
| C10A<br>6 |                                                              | Diabetes | Read |
| C10F6     | Type II diabetes mellitus with retinopathy                   | Diabetes | Read |
| C107y     | Other specified diabetes mellitus with periph circ comps     | Diabetes | Read |
| C106.     | Diabetes mellitus with polyneuropathy                        | Diabetes | Read |
| C101.     | Diabetes mellitus with ketoacidosis                          | Diabetes | Read |
| C1092     | Non-insulin-dependent diabetes mellitus with neuro comps     | Diabetes | Read |
| C106.     | Diabetic amyotrophy                                          | Diabetes | Read |
| C106.     | Diabetes mellitus with neuropathy                            | Diabetes | Read |
| C10F<br>G | Type II diabetes mellitus with arthropathy                   | Diabetes | Read |
| C10F.     | Type 2 diabetes mellitus                                     | Diabetes | Read |
| C109C     | Type II diabetes mellitus with nephropathy                   | Diabetes | Read |
| C10B0     | Steroid induced diabetes mellitus without complication       | Diabetes | Read |
| C109C     | Type 2 diabetes mellitus with nephropathy                    | Diabetes | Read |
| C10F6     | Type 2 diabetes mellitus with retinopathy                    | Diabetes | Read |
| C108z     | Unspecified diabetes mellitus with multiple complications    | Diabetes | Read |
| C10A<br>W |                                                              | Diabetes | Read |
| C10E<br>D | Insulin dependent diabetes mellitus with nephropathy         | Diabetes | Read |
| C10y0     | Diabetes mellitus, juvenile, + other specified manifestation | Diabetes | Read |
| C10E<br>D | Type I diabetes mellitus with nephropathy                    | Diabetes | Read |
| C1084     | Unstable insulin dependent diabetes mellitus                 | Diabetes | Read |
| C10E<br>H |                                                              | Diabetes | Read |
| C10E<br>H |                                                              | Diabetes | Read |
| C1080     | Insulin-dependent diabetes mellitus with renal complications | Diabetes | Read |
| C10P0     | Type 1 diabetes mellitus in remission                        | Diabetes | Read |
| C10EL     |                                                              | Diabetes | Read |
| C108E     | Type 1 diabetes mellitus with hypoglycaemic coma             | Diabetes | Read |
| C10EP     | Type I diabetes mellitus with exudative maculopathy          | Diabetes | Read |
| C108<br>A |                                                              | Diabetes | Read |
| C108E     | Type I diabetes mellitus with hypoglycaemic coma             | Diabetes | Read |

|           |                                                              |          |      |
|-----------|--------------------------------------------------------------|----------|------|
| C10E3     | Type 1 diabetes mellitus with multiple complications         | Diabetes | Read |
| C108<br>A | Type I diabetes mellitus without complication                | Diabetes | Read |
| C10E7     | Type 1 diabetes mellitus with retinopathy                    | Diabetes | Read |
| C1089     | Type 1 diabetes mellitus maturity onset                      | Diabetes | Read |
| C1085     | Type 1 diabetes mellitus with ulcer                          | Diabetes | Read |
| C1089     | Type I diabetes mellitus maturity onset                      | Diabetes | Read |
| C1084     | Unstable type 1 diabetes mellitus                            | Diabetes | Read |
| C10E<br>D | Type 1 diabetes mellitus with nephropathy                    | Diabetes | Read |
| C1084     | Unstable type I diabetes mellitus                            | Diabetes | Read |
| C1030     | Diabetes mellitus, juvenile type, with ketoacidotic coma     | Diabetes | Read |
| C10E<br>H | Type 1 diabetes mellitus with arthropathy                    | Diabetes | Read |
| C1080     | Type 1 diabetes mellitus with renal complications            | Diabetes | Read |
| C1080     | Type I diabetes mellitus with renal complications            | Diabetes | Read |
| C10EL     | Type 1 diabetes mellitus with persistent microalbuminuria    | Diabetes | Read |
| C10P0     | Type I diabetes mellitus in remission                        | Diabetes | Read |
| C10E0     | Insulin-dependent diabetes mellitus with renal complications | Diabetes | Read |
| C10EP     | Type 1 diabetes mellitus with exudative maculopathy          | Diabetes | Read |
| C10E0     | Type I diabetes mellitus with renal complications            | Diabetes | Read |
| C108<br>H | Insulin dependent diabetes mellitus with arthropathy         | Diabetes | Read |
| C10E4     | Unstable insulin dependent diabetes mellitus                 | Diabetes | Read |
| C10E4     | Unstable type I diabetes mellitus                            | Diabetes | Read |
| C108<br>D | Insulin dependent diabetes mellitus with nephropathy         | Diabetes | Read |
| C10E8     | Insulin dependent diabetes mellitus - poor control           | Diabetes | Read |
| C10E8     | Type I diabetes mellitus - poor control                      | Diabetes | Read |
| C1000     | Diabetes mellitus, juvenile type, no mention of complication | Diabetes | Read |
| C1088     | Insulin dependent diabetes mellitus - poor control           | Diabetes | Read |
| C1060     | Diabetes mellitus, juvenile, + neurological manifestation    | Diabetes | Read |
| C1083     | Insulin dependent diabetes mellitus with multiple complicatn | Diabetes | Read |
| C10EC     | Insulin dependent diabetes mellitus with polyneuropathy      | Diabetes | Read |
| C10EC     |                                                              | Diabetes | Read |
| C10E<br>G |                                                              | Diabetes | Read |
| C10E<br>G |                                                              | Diabetes | Read |
| C10E.     | Type 1 diabetes mellitus                                     | Diabetes | Read |
| C10EK     | Type I diabetes mellitus with persistent proteinuria         | Diabetes | Read |
| C10E2     | Type 1 diabetes mellitus with neurological complications     | Diabetes | Read |
| C108      |                                                              | Diabetes | Read |

|           |                                                             |          |      |
|-----------|-------------------------------------------------------------|----------|------|
| H         |                                                             |          |      |
| C108<br>H | Type I diabetes mellitus with arthropathy                   | Diabetes | Read |
| C10E6     | Type 1 diabetes mellitus with gangrene                      | Diabetes | Read |
| C108<br>D | Type 1 diabetes mellitus with nephropathy                   | Diabetes | Read |
| C108<br>D | Type I diabetes mellitus with nephropathy                   | Diabetes | Read |
| C1000     | Insulin dependent diabetes mellitus                         | Diabetes | Read |
| C10EB     | Type 1 diabetes mellitus with mononeuropathy                | Diabetes | Read |
| C1088     | Type 1 diabetes mellitus - poor control                     | Diabetes | Read |
| C1088     | Type I diabetes mellitus - poor control                     | Diabetes | Read |
| C1083     |                                                             | Diabetes | Read |
| C1083     | Type 1 diabetes mellitus with multiple complications        | Diabetes | Read |
| C10EC     | Type 1 diabetes mellitus with polyneuropathy                | Diabetes | Read |
| C10E<br>G | Type 1 diabetes mellitus with peripheral angiopathy         | Diabetes | Read |
| C10EK     | Type 1 diabetes mellitus with persistent proteinuria        | Diabetes | Read |
| C108<br>G | Insulin dependent diab mell with peripheral angiopathy      | Diabetes | Read |
| C108C     | Insulin dependent diabetes mellitus with polyneuropathy     | Diabetes | Read |
| C10E3     | Insulin dependent diabetes mellitus with multiple complicat | Diabetes | Read |
| C10E3     | Type I diabetes mellitus with multiple complications        | Diabetes | Read |
| C10E7     | Insulin dependent diabetes mellitus with retinopathy        | Diabetes | Read |
| C10E7     | Type I diabetes mellitus with retinopathy                   | Diabetes | Read |
| C1087     | Insulin dependent diabetes mellitus with retinopathy        | Diabetes | Read |
| C10EF     | Type I diabetes mellitus with diabetic cataract             | Diabetes | Read |
| C1082     | Insulin-dependent diabetes mellitus with neurological comps | Diabetes | Read |
| C10EB     |                                                             | Diabetes | Read |
| C10EJ     |                                                             | Diabetes | Read |
| C108.     | Insulin dependent diabetes mellitus                         | Diabetes | Read |
| C1040     | Diabetes mellitus, juvenile type, with renal manifestation  | Diabetes | Read |
| C10EF     | Insulin dependent diabetes mellitus with diabetic cataract  | Diabetes | Read |
| C10E<br>N |                                                             | Diabetes | Read |
| C10EJ     | Insulin dependent diab mell with neuropathic arthropathy    | Diabetes | Read |
| C108<br>G |                                                             | Diabetes | Read |
| C10E1     | Type 1 diabetes mellitus with ophthalmic complications      | Diabetes | Read |
| C108<br>G |                                                             | Diabetes | Read |
| C108C     |                                                             | Diabetes | Read |
| C10E5     | Type 1 diabetes mellitus with ulcer                         | Diabetes | Read |

|           |                                                              |          |      |
|-----------|--------------------------------------------------------------|----------|------|
| C108C     |                                                              | Diabetes | Read |
| C10E9     | Type 1 diabetes mellitus maturity onset                      | Diabetes | Read |
| C1010     | Diabetes mellitus, juvenile type, with ketoacidosis          | Diabetes | Read |
| C1087     | Type I diabetes mellitus with retinopathy                    | Diabetes | Read |
| C10EA     | Type 1 diabetes mellitus without complication                | Diabetes | Read |
| C1087     | Type 1 diabetes mellitus with retinopathy                    | Diabetes | Read |
| C1082     | Type 1 diabetes mellitus with neurological complications     | Diabetes | Read |
| C10EF     | Type 1 diabetes mellitus with diabetic cataract              | Diabetes | Read |
| C1082     |                                                              | Diabetes | Read |
| C10z0     | Diabetes mellitus, juvenile type, + unspecified complication | Diabetes | Read |
| C108.     | Type 1 diabetes mellitus                                     | Diabetes | Read |
| C10EJ     | Type 1 diabetes mellitus with neuropathic arthropathy        | Diabetes | Read |
| C108.     | IDDM-Insulin dependent diabetes mellitus                     | Diabetes | Read |
| C1070     | Diabetes mellitus, juvenile +peripheral circulatory disorder | Diabetes | Read |
| C108.     | Type I diabetes mellitus                                     | Diabetes | Read |
| C10E<br>N | Type 1 diabetes mellitus with ketoacidotic coma              | Diabetes | Read |
| C10E.     | Type I diabetes mellitus                                     | Diabetes | Read |
| C108J     | Insulin dependent diab mell with neuropathic arthropathy     | Diabetes | Read |
| C10E2     |                                                              | Diabetes | Read |
| C108F     | Insulin dependent diabetes mellitus with diabetic cataract   | Diabetes | Read |
| C10E.     | Insulin dependent diabetes mellitus                          | Diabetes | Read |
| C10E6     | Type I diabetes mellitus with gangrene                       | Diabetes | Read |
| C108B     | Insulin dependent diabetes mellitus with mononeuropathy      | Diabetes | Read |
| C10E2     | Insulin-dependent diabetes mellitus with neurological comps  | Diabetes | Read |
| C10E6     | Insulin dependent diabetes mellitus with gangrene            | Diabetes | Read |
| C10EB     |                                                              | Diabetes | Read |
| C1086     | Insulin dependent diabetes mellitus with gangrene            | Diabetes | Read |
| C10EE     | Insulin dependent diabetes mellitus with hypoglycaemic coma  | Diabetes | Read |
| C10EE     |                                                              | Diabetes | Read |
| C1085     | Insulin dependent diabetes mellitus with ulcer               | Diabetes | Read |
| C1081     | Insulin-dependent diabetes mellitus with ophthalmic comps    | Diabetes | Read |
| C108J     | Type 1 diabetes mellitus with neuropathic arthropathy        | Diabetes | Read |
| C10E<br>M | Type I diabetes mellitus with ketoacidosis                   | Diabetes | Read |
| C108J     | Type I diabetes mellitus with neuropathic arthropathy        | Diabetes | Read |
| C108F     |                                                              | Diabetes | Read |
| C108F     | Type I diabetes mellitus with diabetic cataract              | Diabetes | Read |
| C10E      | Type I diabetes mellitus with gastroparesis                  | Diabetes | Read |

|        |                                                              |          |      |
|--------|--------------------------------------------------------------|----------|------|
| Q      |                                                              |          |      |
| C10E0  | Type 1 diabetes mellitus with renal complications            | Diabetes | Read |
| C108B  |                                                              | Diabetes | Read |
| C108B  | Type I diabetes mellitus with mononeuropathy                 | Diabetes | Read |
| C10E4  | Unstable type 1 diabetes mellitus                            | Diabetes | Read |
| C10E8  | Type 1 diabetes mellitus - poor control                      | Diabetes | Read |
| C1086  |                                                              | Diabetes | Read |
| C1086  |                                                              | Diabetes | Read |
| C10EE  | Type 1 diabetes mellitus with hypoglycaemic coma             | Diabetes | Read |
| C1050  | Diabetes mellitus, juvenile type, + ophthalmic manifestation | Diabetes | Read |
| C1081  | Type 1 diabetes mellitus with ophthalmic complications       | Diabetes | Read |
| C1085  | Type I diabetes mellitus with ulcer                          | Diabetes | Read |
| C1073  | IDDM with peripheral circulatory disorder                    | Diabetes | Read |
| C1081  |                                                              | Diabetes | Read |
| C10E M | Type 1 diabetes mellitus with ketoacidosis                   | Diabetes | Read |
| C10E1  | Insulin-dependent diabetes mellitus with ophthalmic comps    | Diabetes | Read |
| C10C.  | Maturity onset diabetes in youth type 1                      | Diabetes | Read |
| C10E1  | Type I diabetes mellitus with ophthalmic complications       | Diabetes | Read |
| C10E Q | Type 1 diabetes mellitus with gastroparesis                  | Diabetes | Read |
| C10E5  | Insulin dependent diabetes mellitus with ulcer               | Diabetes | Read |
| C10E5  | Type I diabetes mellitus with ulcer                          | Diabetes | Read |
| C108E  | Insulin dependent diabetes mellitus with hypoglycaemic coma  | Diabetes | Read |
| C10E9  | Insulin dependent diabetes maturity onset                    | Diabetes | Read |
| C10E9  | Type I diabetes mellitus maturity onset                      | Diabetes | Read |
| C108 A | Insulin-dependent diabetes without complication              | Diabetes | Read |
| C1020  | Diabetes mellitus, juvenile type, with hyperosmolar coma     | Diabetes | Read |
| C10EA  | Insulin-dependent diabetes without complication              | Diabetes | Read |
| C10EA  | Type I diabetes mellitus without complication                | Diabetes | Read |
| C1089  | Insulin dependent diabetes maturity onset                    | Diabetes | Read |
| C1061  | Diabetes mellitus, adult onset, + neurological manifestation | Diabetes | Read |
| C1096  | Type II diabetes mellitus with retinopathy                   | Diabetes | Read |
| C1092  | Type 2 diabetes mellitus with neurological complications     | Diabetes | Read |
| C109.  | Type II diabetes mellitus                                    | Diabetes | Read |
| C109.  | Type 2 diabetes mellitus                                     | Diabetes | Read |
| C1092  | Type II diabetes mellitus with neurological complications    | Diabetes | Read |
| C10FE  | Type 2 diabetes mellitus with diabetic cataract              | Diabetes | Read |
| C10F Q | Type 2 diabetes mellitus with exudative maculopathy          | Diabetes | Read |
| C109.  | NIDDM - Non-insulin dependent diabetes mellitus              | Diabetes | Read |

|       |                                                             |          |      |
|-------|-------------------------------------------------------------|----------|------|
| C109J | Insulin treated Type 2 diabetes mellitus                    | Diabetes | Read |
| C10FM | Type 2 diabetes mellitus with persistent microalbuminuria   | Diabetes | Read |
| C10D. | Maturity onset diabetes in youth type 2                     | Diabetes | Read |
| C10F1 | Type II diabetes mellitus with ophthalmic complications     | Diabetes | Read |
| C109F | Non-insulin-dependent d m with peripheral angiopath         | Diabetes | Read |
| C10F9 | Type II diabetes mellitus without complication              | Diabetes | Read |
| C10F5 | Type II diabetes mellitus with gangrene                     | Diabetes | Read |
| C109B | Non-insulin dependent diabetes mellitus with polyneuropathy | Diabetes | Read |
| C10FA | Type II diabetes mellitus with mononeuropathy               | Diabetes | Read |
| C1031 | Diabetes mellitus, adult onset, with ketoacidotic coma      | Diabetes | Read |
| C1001 | Non-insulin dependent diabetes mellitus                     | Diabetes | Read |
| C1095 | Non-insulin dependent diabetes mellitus with gangrene       | Diabetes | Read |
| C10FJ | Insulin treated Type II diabetes mellitus                   | Diabetes | Read |
| C1091 | Non-insulin-dependent diabetes mellitus with ophthalm comps | Diabetes | Read |
| C10FF | Type II diabetes mellitus with peripheral angiopathy        | Diabetes | Read |
| C109J | Insulin treated Type II diabetes mellitus                   | Diabetes | Read |
| C10FR | Type II diabetes mellitus with gastroparesis                | Diabetes | Read |
| C109J | Insulin treated non-insulin dependent diabetes mellitus     | Diabetes | Read |
| C109F | Type 2 diabetes mellitus with peripheral angiopathy         | Diabetes | Read |
| C10D. | Diabetes mellitus autosomal dominant type 2                 | Diabetes | Read |
| C10F1 | Type 2 diabetes mellitus with ophthalmic complications      | Diabetes | Read |
| C10FN | Type II diabetes mellitus with ketoacidosis                 | Diabetes | Read |
| C109F | Type II diabetes mellitus with peripheral angiopathy        | Diabetes | Read |
| C10F9 | Type 2 diabetes mellitus without complication               | Diabetes | Read |
| C109B | Type 2 diabetes mellitus with polyneuropathy                | Diabetes | Read |
| C10F5 | Type 2 diabetes mellitus with gangrene                      | Diabetes | Read |
| C109B | Type II diabetes mellitus with polyneuropathy               | Diabetes | Read |
| C10FA | Type 2 diabetes mellitus with mononeuropathy                | Diabetes | Read |
| C1096 | Type 2 diabetes mellitus with retinopathy                   | Diabetes | Read |
| C1095 | Type II diabetes mellitus with gangrene                     | Diabetes | Read |
| C10FH | Type 2 diabetes mellitus with neuropathic arthropathy       | Diabetes | Read |
| C1095 | Type 2 diabetes mellitus with gangrene                      | Diabetes | Read |
| C1041 | Diabetes mellitus, adult onset, with renal manifestation    | Diabetes | Read |
| C1091 | Type II diabetes mellitus with ophthalmic complications     | Diabetes | Read |
| C10FD | Type 2 diabetes mellitus with hypoglycaemic coma            | Diabetes | Read |
| C1091 | Type 2 diabetes mellitus with ophthalmic complications      | Diabetes | Read |
| C10FP | Type 2 diabetes mellitus with ketoacidotic coma             | Diabetes | Read |
| C10FL | Type 2 diabetes mellitus with persistent proteinuria        | Diabetes | Read |
| C10F0 | Type II diabetes mellitus with renal complications          | Diabetes | Read |
| C109E | Non-insulin depend diabetes mellitus with diabetic cataract | Diabetes | Read |
| C10F8 | Metabolic syndrome X                                        | Diabetes | Read |

|           |                                                              |          |      |
|-----------|--------------------------------------------------------------|----------|------|
| C10F4     | Type II diabetes mellitus with ulcer                         | Diabetes | Read |
| C109<br>A | Non-insulin dependent diabetes mellitus with mononeuropathy  | Diabetes | Read |
| C1011     | Diabetes mellitus, adult onset, with ketoacidosis            | Diabetes | Read |
| C1099     | Non-insulin-dependent diabetes mellitus without complication | Diabetes | Read |
| C1071     | Diabetes mellitus, adult, + peripheral circulatory disorder  | Diabetes | Read |
| C10z1     | Diabetes mellitus, adult onset, + unspecified complication   | Diabetes | Read |
| C1094     | Non-insulin dependent diabetes mellitus with ulcer           | Diabetes | Read |
| C10FE     | Type II diabetes mellitus with diabetic cataract             | Diabetes | Read |
| C1090     | Non-insulin-dependent diabetes mellitus with renal comps     | Diabetes | Read |
| C10F<br>Q | Type II diabetes mellitus with exudative maculopathy         | Diabetes | Read |
| C10F<br>M | Type II diabetes mellitus with persistent microalbuminuria   | Diabetes | Read |
| C10F0     | Type 2 diabetes mellitus with renal complications            | Diabetes | Read |
| C109E     | Type II diabetes mellitus with diabetic cataract             | Diabetes | Read |
| C109E     | Type 2 diabetes mellitus with diabetic cataract              | Diabetes | Read |
| C10F4     | Type 2 diabetes mellitus with ulcer                          | Diabetes | Read |
| C109<br>A |                                                              | Diabetes | Read |
| C109<br>A |                                                              | Diabetes | Read |
| C1099     |                                                              | Diabetes | Read |
| C1099     | Type 2 diabetes mellitus without complication                | Diabetes | Read |
| C1094     | Type 2 diabetes mellitus with ulcer                          | Diabetes | Read |
| C1094     | Type II diabetes mellitus with ulcer                         | Diabetes | Read |
| C10FK     | Hyperosmolar non-ketotic state in type 2 diabetes mellitus   | Diabetes | Read |
| C1090     | Type 2 diabetes mellitus with renal complications            | Diabetes | Read |
| C1090     | Type II diabetes mellitus with renal complications           | Diabetes | Read |
| C10F<br>G | Type 2 diabetes mellitus with arthropathy                    | Diabetes | Read |
| C10F3     | Type II diabetes mellitus with multiple complications        | Diabetes | Read |
| C109<br>H | Non-insulin dependent d m with neuropathic arthropathy       | Diabetes | Read |
| C109<br>D | Non-insulin dependent diabetes mellitus with hypoglyca coma  | Diabetes | Read |
| C10F7     | Type II diabetes mellitus - poor control                     | Diabetes | Read |
| C10FC     | Type II diabetes mellitus with nephropathy                   | Diabetes | Read |
| C10FH     | Type II diabetes mellitus with neuropathic arthropathy       | Diabetes | Read |
| C1051     | Diabetes mellitus, adult onset, + ophthalmic manifestation   | Diabetes | Read |
| C1074     | NIDDM with peripheral circulatory disorder                   | Diabetes | Read |
| C1093     | Non-insulin-dependent diabetes mellitus with multiple comps  | Diabetes | Read |

|           |                                                             |          |      |
|-----------|-------------------------------------------------------------|----------|------|
| C10FD     | Type II diabetes mellitus with hypoglycaemic coma           | Diabetes | Read |
| C10FP     | Type II diabetes mellitus with ketoacidotic coma            | Diabetes | Read |
| C109<br>H | Type 2 diabetes mellitus with neuropathic arthropathy       | Diabetes | Read |
| C10F3     | Type 2 diabetes mellitus with multiple complications        | Diabetes | Read |
| C10FL     | Type II diabetes mellitus with persistent proteinuria       | Diabetes | Read |
| C109<br>H | Type II diabetes mellitus with neuropathic arthropathy      | Diabetes | Read |
| C109<br>D | Type 2 diabetes mellitus with hypoglycaemic coma            | Diabetes | Read |
| C109<br>D | Type II diabetes mellitus with hypoglycaemic coma           | Diabetes | Read |
| C10F7     | Type 2 diabetes mellitus - poor control                     | Diabetes | Read |
| C1021     | Diabetes mellitus, adult onset, with hyperosmolar coma      | Diabetes | Read |
| C10FC     | Type 2 diabetes mellitus with nephropathy                   | Diabetes | Read |
| C10y1     | Diabetes mellitus, adult, + other specified manifestation   | Diabetes | Read |
| C1093     | Type II diabetes mellitus with multiple complications       | Diabetes | Read |
| C10FJ     | Insulin treated Type 2 diabetes mellitus                    | Diabetes | Read |
| C1093     | Type 2 diabetes mellitus with multiple complications        | Diabetes | Read |
| C10FF     | Type 2 diabetes mellitus with peripheral angiopathy         | Diabetes | Read |
| C10F.     | Type II diabetes mellitus                                   | Diabetes | Read |
| C109K     | Hyperosmolar non-ketotic state in type 2 diabetes mellitus  | Diabetes | Read |
| C10FR     | Type 2 diabetes mellitus with gastroparesis                 | Diabetes | Read |
| C10P1     | Type 2 diabetes mellitus in remission                       | Diabetes | Read |
| C10F2     | Type II diabetes mellitus with neurological complications   | Diabetes | Read |
| C109<br>G | Non-insulin dependent diabetes mellitus with arthropathy    | Diabetes | Read |
| C10F<br>N | Type 2 diabetes mellitus with ketoacidosis                  | Diabetes | Read |
| C109C     | Non-insulin dependent diabetes mellitus with nephropathy    | Diabetes | Read |
| C10F6     | Type II diabetes mellitus with retinopathy                  | Diabetes | Read |
| C10FB     | Type II diabetes mellitus with polyneuropathy               | Diabetes | Read |
| C1097     | Non-insulin dependent diabetes mellitus - poor control      | Diabetes | Read |
| C1096     | Non-insulin-dependent diabetes mellitus with retinopathy    | Diabetes | Read |
| C10FK     | Hyperosmolar non-ketotic state in type II diabetes mellitus | Diabetes | Read |
| C1092     | Non-insulin-dependent diabetes mellitus with neuro comps    | Diabetes | Read |
| C10F<br>G | Type II diabetes mellitus with arthropathy                  | Diabetes | Read |
| C10F.     | Type 2 diabetes mellitus                                    | Diabetes | Read |
| C109.     | Non-insulin dependent diabetes mellitus                     | Diabetes | Read |
| C10P1     | Type II diabetes mellitus in remission                      | Diabetes | Read |
| C10F2     | Type 2 diabetes mellitus with neurological complications    | Diabetes | Read |



|       |                                                              |          |      |
|-------|--------------------------------------------------------------|----------|------|
| C109G |                                                              | Diabetes | Read |
| C109G | Type 2 diabetes mellitus with arthropathy                    | Diabetes | Read |
| C109C | Type II diabetes mellitus with nephropathy                   | Diabetes | Read |
| C109C | Type 2 diabetes mellitus with nephropathy                    | Diabetes | Read |
| C10F6 | Type 2 diabetes mellitus with retinopathy                    | Diabetes | Read |
| C1001 | Diabetes mellitus, adult onset, no mention of complication   | Diabetes | Read |
| C10FB | Type 2 diabetes mellitus with polyneuropathy                 | Diabetes | Read |
| C1097 | Type II diabetes mellitus - poor control                     | Diabetes | Read |
| C1097 | Type 2 diabetes mellitus - poor control                      | Diabetes | Read |
| 14AC. | H/O: pulmonary embolus                                       | Embolism | Read |
| 7A093 | Open embolectomy of pulmonary artery                         | Embolism | Read |
| 7A093 | Trendelenburg pulmonary embolectomy                          | Embolism | Read |
| 7A0A1 | Percutaneous transluminal embolectomy of pulmonary artery    | Embolism | Read |
| 7A0B0 | Pulmonary thromboendarterectomy                              | Embolism | Read |
| G4010 | Post operative pulmonary embolus                             | Embolism | Read |
| G4011 | Recurrent pulmonary embolism                                 | Embolism | Read |
| G401. | Pulmonary embolism                                           | Embolism | Read |
| G401. | Pulmonary embolus                                            | Embolism | Read |
| ZV129 | [V] Personal history of pulmonary embolism                   | Embolism | Read |
| 14A81 | H/O: Deep Vein Thrombosis                                    | Embolism | Read |
| 8CMWA | On deep vein thrombosis care pathway                         | Embolism | Read |
| 9kg0. | DVT stage 1 service level - enhanced services administration | Embolism | Read |
| 9kg.. | Deep vein thrombosis - enhanced services administration      | Embolism | Read |
| 9kg0. | DVT enhanced services administration stage 1 service level   | Embolism | Read |
| 9kg1. | DVT stage 2 service level - enhanced services administration | Embolism | Read |
| 9kg2. | DVT stage 3 service level - enhanced services administration | Embolism | Read |
| F0500 | Embolism cavernous sinus                                     | Embolism | Read |
| F050. | Embolism of central nervous system venous sinus              | Embolism | Read |
| F05.. | Phlebitis and thrombophlebitis of intracranial sinuses       | Embolism | Read |
| F0501 | Embolism superior longitudinal sinus                         | Embolism | Read |
| F0503 | Embolism transverse sinus                                    | Embolism | Read |
| F0510 | Thrombosis cavernous sinus                                   | Embolism | Read |
| F051. | Thrombosis of central nervous system venous sinuses          | Embolism | Read |
| F0511 | Thrombosis of superior longitudinal sinus                    | Embolism | Read |
| F0512 | Thrombosis lateral sinus                                     | Embolism | Read |

|       |                                                             |          |      |
|-------|-------------------------------------------------------------|----------|------|
| F0513 | Thrombosis transverse sinus                                 | Embolism | Read |
| F051z | Thrombosis of central nervous system venous sinus NOS       | Embolism | Read |
| F0530 | Thrombophlebitis of cavernous sinus                         | Embolism | Read |
| F053. | Thrombophlebitis of central nervous system venous sinuses   | Embolism | Read |
| F0531 | Thrombophlebitis of superior longitudinal venous sinus      | Embolism | Read |
| F05z. | Phlebitis or thrombophlebitis of CNS venous sinus NOS       | Embolism | Read |
| G6760 | Cereb infarct due cerebral venous thrombosis, nonpyogenic   | Embolism | Read |
| G676. | Nonpyogenic venous sinus thrombosis                         | Embolism | Read |
| G67A. | Cerebral vein thrombosis                                    | Embolism | Read |
| G801. | Deep vein phlebitis and thrombophlebitis of the leg         | Embolism | Read |
| G801. | Deep vein thrombosis                                        | Embolism | Read |
| G801. | Deep vein thrombosis, leg                                   | Embolism | Read |
| G801. | DVT - Deep vein thrombosis                                  | Embolism | Read |
| G8016 | Thrombophlebitis of the femoral vein                        | Embolism | Read |
| G8017 | Thrombophlebitis of the popliteal vein                      | Embolism | Read |
| G8018 | Thrombophlebitis of the anterior tibial vein                | Embolism | Read |
| G8019 | Thrombophlebitis of the dorsalis pedis vein                 | Embolism | Read |
| G801A | Thrombophlebitis of the posterior tibial vein               | Embolism | Read |
| G801B | Deep vein thrombophlebitis of the leg unspecified           | Embolism | Read |
| G801C | Deep vein thrombosis of leg related to air travel           | Embolism | Read |
| G801D | Deep vein thrombosis of lower limb                          | Embolism | Read |
| G801E | Deep vein thrombosis of leg related to intravenous drug use | Embolism | Read |
| G801F | Deep vein thrombosis of peroneal vein                       | Embolism | Read |
| G801G | Recurrent deep vein thrombosis                              | Embolism | Read |
| G801z | Deep vein phlebitis and thrombophlebitis of the leg NOS     | Embolism | Read |
| G80y. | Phlebitis and/or thrombophlebitis of iliac vein             | Embolism | Read |
| G80y4 | Thrombophlebitis of the common iliac vein                   | Embolism | Read |
| G80y5 | Thrombophlebitis of the internal iliac vein                 | Embolism | Read |
| G80y6 | Thrombophlebitis of the external iliac vein                 | Embolism | Read |
| G80y7 | Thrombophlebitis of the iliac vein unspecified              | Embolism | Read |
| G80y8 | Phlebitis and thrombophlebitis of the iliac vein NOS        | Embolism | Read |
| G81.. | Portal vein thrombosis                                      | Embolism | Read |
| G820. | Budd - Chiari syndrome (hepatic vein thrombosis)            | Embolism | Read |
| G820. | Hepatic vein thrombosis                                     | Embolism | Read |
| G8220 | Thrombosis of inferior vena cava                            | Embolism | Read |

|           |                                                               |          |        |
|-----------|---------------------------------------------------------------|----------|--------|
| G822.     | Embolism and thrombosis of the vena cava                      | Embolism | Read   |
| G823.     | Embolism and thrombosis of the renal vein                     | Embolism | Read   |
| G824.     | Axillary vein thrombosis                                      | Embolism | Read   |
| G825.     | Thrombosis of subclavian vein                                 | Embolism | Read   |
| G826.     | Thrombosis of internal jugular vein                           | Embolism | Read   |
| G827.     | Thrombosis of external jugular vein                           | Embolism | Read   |
| Gyu80     | [X]Phlebitis+thrombophlebitis/oth deep vessls/low extremities | Embolism | Read   |
| J4202     | Thrombus of the superior mesenteric veins                     | Embolism | Read   |
| SP122     | Post operative deep vein thrombosis                           | Embolism | Read   |
| ZV128     | [V] Personal history deep vein thrombosis                     | Embolism | Read   |
| ZV128     | [V] Personal history DVT- deep vein thrombosis                | Embolism | Read   |
| I26.      | Diagnosis of Pulmonary embolism                               | Embolism | ICD-10 |
| 8HIL.     | Referral for chronic fatigue syndrome activity management     | Fatigue  | Read   |
| 8Q1..     | Activity management for chronic fatigue syndrome              | Fatigue  | Read   |
| E205.     | Neurasthenia - nervous debility                               | Fatigue  | Read   |
| Eu460     | [X]Neurasthenia                                               | Fatigue  | Read   |
| F03y.     | Myalgic encephalomyelitis                                     | Fatigue  | Read   |
| F286.     | Chronic fatigue syndrome                                      | Fatigue  | Read   |
| F2860     | Mild chronic fatigue syndrome                                 | Fatigue  | Read   |
| F2861     | Moderate chronic fatigue syndrome                             | Fatigue  | Read   |
| F2862     | Severe chronic fatigue syndrome                               | Fatigue  | Read   |
| N239.     | Fibromyalgia                                                  | Fatigue  | Read   |
| N240<br>1 | Fibrositis unspecified                                        | Fatigue  | Read   |
| N240<br>5 | Fibrositis of neck                                            | Fatigue  | Read   |
| N240<br>6 | Fibrositis arm                                                | Fatigue  | Read   |
| N248.     | Fibromyalgia                                                  | Fatigue  | Read   |
| R0074     | [D]Postviral (asthenic) syndrome                              | Fatigue  | Read   |
| R0000     | Drowsiness                                                    | Fatigue  | Read   |
| R0001     | Somnolence                                                    | Fatigue  | Read   |
| R0070     | Malaise                                                       | Fatigue  | Read   |
| R0071     | Fatigue                                                       | Fatigue  | Read   |
| R0072     | Asthenia                                                      | Fatigue  | Read   |
| R0073     | Lethargy                                                      | Fatigue  | Read   |
| R0074     | Postviral (asthenic) syndrome                                 | Fatigue  | Read   |
| R0075     | Tiredness                                                     | Fatigue  | Read   |
| R007z     | Malaise & Fatigue NOS                                         | Fatigue  | Read   |
| R009.     | Confusion                                                     | Fatigue  | Read   |
| R00z7     | Demoralisation and apathy                                     | Fatigue  | Read   |
| R00zX     | Disorientation, unspecified                                   | Fatigue  | Read   |
| F286.     | Chronic Fatigue Syndrome/Postviral fatigue syndrome           | Fatigue  | Read   |

|       |                                                              |                                 |      |
|-------|--------------------------------------------------------------|---------------------------------|------|
| F2860 | Mild chronic fatigue syndrome                                | Fatigue                         | Read |
| F2861 | Moderate chronic fatigue syndrome                            | Fatigue                         | Read |
| F2862 | Severe chronic fatigue syndrome                              | Fatigue                         | Read |
| Eu460 | Fatigue syndrome                                             | Fatigue                         | Read |
| 168.. | Fatigue - symptom                                            | Fatigue                         | Read |
| 1682. | Fatigue                                                      | Fatigue                         | Read |
| 1683. | Tired all the time                                           | Fatigue                         | Read |
| 1684. | Malaise/lethargy                                             | Fatigue                         | Read |
| 1686. | Heavy legs                                                   | Fatigue                         | Read |
| 1687. | Heavy feeling                                                | Fatigue                         | Read |
| 1688. | Exhaustion                                                   | Fatigue                         | Read |
| 168Z. | Tiredness symptom NOS                                        | Fatigue                         | Read |
| E030. | Acute confusional state                                      | Fatigue                         | Read |
| E0301 | Acute confusional state, of infective origin                 | Fatigue                         | Read |
| E030z | Acute confusional state NOS                                  | Fatigue                         | Read |
| E031. | Subacute confusional state                                   | Fatigue                         | Read |
| E0311 | Subacute confusional state, of infective origin              | Fatigue                         | Read |
| E031z | Subacute confusional state NOS                               | Fatigue                         | Read |
| 1BW.. | Poor concentration                                           | Fatigue                         | Read |
| 1BR.. | Reduced concentration                                        | Fatigue                         | Read |
| 1BR0. | Reduced concentration span                                   | Fatigue                         | Read |
| E030. | Acute confusional state                                      | Fatigue                         | Read |
| E0301 | Acute confusional state, of infective origin                 | Fatigue                         | Read |
| E030z | Acute confusional state NOS                                  | Fatigue                         | Read |
| E031. | Subacute confusional state                                   | Fatigue                         | Read |
| E0311 | Subacute confusional state, of infective origin              | Fatigue                         | Read |
| E031z | Subacute confusional state NOS                               | Fatigue                         | Read |
| 1BW.. | Poor concentration                                           | Fatigue                         | Read |
| 1BR.. | Reduced concentration                                        | Fatigue                         | Read |
| 1BR0. | Reduced concentration span                                   | Fatigue                         | Read |
| F286. | CFS - Chronic fatigue syndrome                               | Fatigue                         | Read |
| F286. | Chronic fatigue syndrome                                     | Fatigue                         | Read |
| F2860 | Mild chronic fatigue syndrome                                | Fatigue                         | Read |
| F2861 | Moderate chronic fatigue synd                                | Fatigue                         | Read |
| F286. | Myalgic encephalomyelitis                                    | Fatigue                         | Read |
| F2862 | Severe chronic fatigue synd                                  | Fatigue                         | Read |
| F03y. | Myalgic encephalomyelitis                                    | Fatigue                         | Read |
| F286. | ME - Myalgic encephalomyelitis                               | Fatigue                         | Read |
| 6A61. | Attention deficit hyperactivity disorder annual review       | Mental and behavioural disorder | Read |
| 8BPT. | Drug therapy ADHD (attention deficit hyperactivity disorder) | Mental and behavioural disorder | Read |
| 9Ngp. | On drug ther ADHD (attention deficit hyperactivity disorder) | Mental and behavioural disorder | Read |
| E2E01 | Attention deficit with hyperactivity                         | Mental and                      | Read |

|       |                                                             |                                 |      |
|-------|-------------------------------------------------------------|---------------------------------|------|
|       |                                                             | behavioural disorder            |      |
| E2E1. | Hyperkinesis with developmental delay                       | Mental and behavioural disorder | Read |
| E2E2. | Hyperkinetic conduct disorder                               | Mental and behavioural disorder | Read |
| E2E.. | Childhood hyperkinetic syndrome                             | Mental and behavioural disorder | Read |
| E2E.. | Overactive child syndrome                                   | Mental and behavioural disorder | Read |
| E2Ey. | Other hyperkinetic manifestation                            | Mental and behavioural disorder | Read |
| E2Ez. | Hyperkinetic syndrome NOS                                   | Mental and behavioural disorder | Read |
| Eu844 | [X]Overactive disorder assoc mental retard/stereotype movts | Mental and behavioural disorder | Read |
| Eu900 | [X]Disturbance of activity and attention                    | Mental and behavioural disorder | Read |
| Eu900 | [X]Attention deficit hyperactivity disorder                 | Mental and behavioural disorder | Read |
| Eu901 | [X]Hyperkinetic conduct disorder                            | Mental and behavioural disorder | Read |
| Eu901 | [X]Hyperkinetic disorder associated with conduct disorder   | Mental and behavioural disorder | Read |
| Eu90. | [X]Hyperkinetic disorders                                   | Mental and behavioural disorder | Read |
| Eu90y | [X]Other hyperkinetic disorders                             | Mental and behavioural disorder | Read |
| Eu90z | [X]Hyperkinetic disorder, unspecified                       | Mental and behavioural disorder | Read |
| Eu90z | [X]Hyperkinetic reaction of childhood or adolescence NOS    | Mental and behavioural disorder | Read |
| Eu90z | [X]Hyperkinetic syndrome NOS                                | Mental and behavioural disorder | Read |
| 1466. | H/O: anxiety state                                          | Mental and behavioural disorder | Read |
| 146G. | H/O: agoraphobia                                            | Mental and behavioural disorder | Read |
| 1B1H. | Fear                                                        | Mental and behavioural disorder | Read |
| 1B1V. | C/O - panic attack                                          | Mental and behavioural disorder | Read |
| 1Bb.. | Specific fear                                               | Mental and behavioural disorder | Read |
| 225J. | O/E - panic attack                                          | Mental and behavioural disorder | Read |
| 225K. | O/E - fearful mood                                          | Mental and behavioural disorder | Read |
| 285.. | Neurotic condition, insight present                         | Mental and behavioural disorder | Read |
| 286.. | Poor insight into neurotic condition                        | Mental and                      | Read |

|       |                                              |                                 |      |
|-------|----------------------------------------------|---------------------------------|------|
|       |                                              | behavioural disorder            |      |
| 8G52. | Antiphobic therapy                           | Mental and behavioural disorder | Read |
| 8G94. | Anxiety management training                  | Mental and behavioural disorder | Read |
| 8HHp. | Referral for guided self-help for anxiety    | Mental and behavioural disorder | Read |
| 9N54. | Encounter for fear                           | Mental and behavioural disorder | Read |
| E2000 | Anxiety state unspecified                    | Mental and behavioural disorder | Read |
| E2001 | Panic disorder                               | Mental and behavioural disorder | Read |
| E2001 | Panic attack                                 | Mental and behavioural disorder | Read |
| E2002 | Generalised anxiety disorder                 | Mental and behavioural disorder | Read |
| E2003 | Anxiety with depression                      | Mental and behavioural disorder | Read |
| E2004 | Chronic anxiety                              | Mental and behavioural disorder | Read |
| E2005 | Recurrent anxiety                            | Mental and behavioural disorder | Read |
| E200. | Anxiety states                               | Mental and behavioural disorder | Read |
| E200z | Anxiety state NOS                            | Mental and behavioural disorder | Read |
| E201B | Compensation neurosis                        | Mental and behavioural disorder | Read |
| E2020 | Phobia unspecified                           | Mental and behavioural disorder | Read |
| E2021 | Agoraphobia with panic attacks               | Mental and behavioural disorder | Read |
| E2022 | Agoraphobia without mention of panic attacks | Mental and behavioural disorder | Read |
| E2023 | Social phobia, fear of eating in public      | Mental and behavioural disorder | Read |
| E2024 | Social phobia, fear of public speaking       | Mental and behavioural disorder | Read |
| E2025 | Social phobia, fear of public washing        | Mental and behavioural disorder | Read |
| E2026 | Acrophobia                                   | Mental and behavioural disorder | Read |
| E2027 | Animal phobia                                | Mental and behavioural disorder | Read |
| E2028 | Claustrophobia                               | Mental and behavioural disorder | Read |
| E2029 | Fear of crowds                               | Mental and behavioural disorder | Read |
| E202A | Fear of flying                               | Mental and                      | Read |

|       |                                                  |                                 |      |
|-------|--------------------------------------------------|---------------------------------|------|
|       |                                                  | behavioural disorder            |      |
| E202B | Cancer phobia                                    | Mental and behavioural disorder | Read |
| E202C | Dental phobia                                    | Mental and behavioural disorder | Read |
| E202D | Fear of death                                    | Mental and behavioural disorder | Read |
| E202. | Phobic disorders                                 | Mental and behavioural disorder | Read |
| E202. | Social phobic disorders                          | Mental and behavioural disorder | Read |
| E202. | Phobic anxiety                                   | Mental and behavioural disorder | Read |
| E202E | Fear of pregnancy                                | Mental and behavioural disorder | Read |
| E202z | Phobic disorder NOS                              | Mental and behavioural disorder | Read |
| E20.. | Neurotic disorders                               | Mental and behavioural disorder | Read |
| E20y1 | Writer's cramp neurosis                          | Mental and behavioural disorder | Read |
| E20y2 | Other occupational neurosis                      | Mental and behavioural disorder | Read |
| E20y3 | Psychasthenic neurosis                           | Mental and behavioural disorder | Read |
| E20y. | Other neurotic disorders                         | Mental and behavioural disorder | Read |
| E20yz | Other neurotic disorder NOS                      | Mental and behavioural disorder | Read |
| E20z. | Neurotic disorder NOS                            | Mental and behavioural disorder | Read |
| Eu341 | [X]Depressive neurosis                           | Mental and behavioural disorder | Read |
| Eu341 | [X]Neurotic depression                           | Mental and behavioural disorder | Read |
| Eu341 | [X]Persistent anxiety depression                 | Mental and behavioural disorder | Read |
| Eu400 | [X]Agoraphobia                                   | Mental and behavioural disorder | Read |
| Eu400 | [X]Agoraphobia without history of panic disorder | Mental and behavioural disorder | Read |
| Eu400 | [X]Panic disorder with agoraphobia               | Mental and behavioural disorder | Read |
| Eu401 | [X]Social phobias                                | Mental and behavioural disorder | Read |
| Eu401 | [X]Social neurosis                               | Mental and behavioural disorder | Read |
| Eu402 | [X]Specific (isolated) phobias                   | Mental and behavioural disorder | Read |
| Eu402 | [X]Acrophobia                                    | Mental and                      | Read |

|       |                                                 |                                 |      |
|-------|-------------------------------------------------|---------------------------------|------|
|       |                                                 | behavioural disorder            |      |
| Eu402 | [X]Animal phobias                               | Mental and behavioural disorder | Read |
| Eu402 | [X]Claustrophobia                               | Mental and behavioural disorder | Read |
| Eu402 | [X]Simple phobia                                | Mental and behavioural disorder | Read |
| Eu403 | [X]Needle phobia                                | Mental and behavioural disorder | Read |
| Eu40. | [X]Phobic anxiety disorders                     | Mental and behavioural disorder | Read |
| Eu40y | [X]Other phobic anxiety disorders               | Mental and behavioural disorder | Read |
| Eu40z | [X]Phobic anxiety disorder, unspecified         | Mental and behavioural disorder | Read |
| Eu40z | [X]Phobia NOS                                   | Mental and behavioural disorder | Read |
| Eu40z | [X]Phobic state NOS                             | Mental and behavioural disorder | Read |
| Eu410 | [X]Panic disorder [episodic paroxysmal anxiety] | Mental and behavioural disorder | Read |
| Eu410 | [X]Panic attack                                 | Mental and behavioural disorder | Read |
| Eu410 | [X]Panic state                                  | Mental and behavioural disorder | Read |
| Eu411 | [X]Generalized anxiety disorder                 | Mental and behavioural disorder | Read |
| Eu411 | [X]Anxiety neurosis                             | Mental and behavioural disorder | Read |
| Eu411 | [X]Anxiety reaction                             | Mental and behavioural disorder | Read |
| Eu411 | [X]Anxiety state                                | Mental and behavioural disorder | Read |
| Eu412 | [X]Mixed anxiety and depressive disorder        | Mental and behavioural disorder | Read |
| Eu412 | [X]Mild anxiety depression                      | Mental and behavioural disorder | Read |
| Eu413 | [X]Other mixed anxiety disorders                | Mental and behavioural disorder | Read |
| Eu41. | [X]Other anxiety disorders                      | Mental and behavioural disorder | Read |
| Eu41y | [X]Other specified anxiety disorders            | Mental and behavioural disorder | Read |
| Eu41y | [X]Anxiety hysteria                             | Mental and behavioural disorder | Read |
| Eu41z | [X]Anxiety disorder, unspecified                | Mental and behavioural disorder | Read |
| Eu41z | [X]Anxiety NOS                                  | Mental and behavioural disorder | Read |
| Z481. | Phobia counselling                              | Mental and                      | Read |



|       |                                                     |                                 |      |
|-------|-----------------------------------------------------|---------------------------------|------|
|       |                                                     | behavioural disorder            |      |
| Z4L1. | Anxiety counselling                                 | Mental and behavioural disorder | Read |
| ZV112 | [V]Personal history of neurosis                     | Mental and behavioural disorder | Read |
| E1400 | Active infantile autism                             | Mental and behavioural disorder | Read |
| E1401 | Residual infantile autism                           | Mental and behavioural disorder | Read |
| E140. | Infantile autism                                    | Mental and behavioural disorder | Read |
| E140. | Kanner's syndrome                                   | Mental and behavioural disorder | Read |
| E140. | Autism                                              | Mental and behavioural disorder | Read |
| E140. | Childhood autism                                    | Mental and behavioural disorder | Read |
| E140z | Infantile autism NOS                                | Mental and behavioural disorder | Read |
| Eu840 | [X]Childhood autism                                 | Mental and behavioural disorder | Read |
| Eu840 | [X]Autistic disorder                                | Mental and behavioural disorder | Read |
| Eu840 | [X]Infantile autism                                 | Mental and behavioural disorder | Read |
| Eu840 | [X]Kanner's syndrome                                | Mental and behavioural disorder | Read |
| Eu841 | [X]Atypical autism                                  | Mental and behavioural disorder | Read |
| Eu841 | [X]Mental retardation with autistic features        | Mental and behavioural disorder | Read |
| Eu845 | [X]Asperger's syndrome                              | Mental and behavioural disorder | Read |
| Eu845 | [X]Autistic psychopathy                             | Mental and behavioural disorder | Read |
| Eu84z | [X]Autistic spectrum disorder                       | Mental and behavioural disorder | Read |
| 1465. | H/O: depression                                     | Mental and behavioural disorder | Read |
| 212S. | Depression resolved                                 | Mental and behavioural disorder | Read |
| 8BK0. | Depression management programme                     | Mental and behavioural disorder | Read |
| 8CAa. | Patient given advice about management of depression | Mental and behavioural disorder | Read |
| 8HHq. | Referral for guided self-help for depression        | Mental and behavioural disorder | Read |
| 9H90. | Depression annual review                            | Mental and behavioural disorder | Read |
| 9H91. | Depression medication review                        | Mental and                      | Read |

|       |                                                              |                                 |      |
|-------|--------------------------------------------------------------|---------------------------------|------|
|       |                                                              | behavioural disorder            |      |
| 9H92. | Depression interim review                                    | Mental and behavioural disorder | Read |
| 9HA0. | On depression register                                       | Mental and behavioural disorder | Read |
| 9k40. | Depression - enhanced service completed                      | Mental and behavioural disorder | Read |
| 9k4.. | Depression - enhanced services administration                | Mental and behavioural disorder | Read |
| 9kQ.. | On full dose long term treatment depression - enh serv admin | Mental and behavioural disorder | Read |
| 9Ov0. | Depression monitoring first letter                           | Mental and behavioural disorder | Read |
| 9Ov1. | Depression monitoring second letter                          | Mental and behavioural disorder | Read |
| 9Ov2. | Depression monitoring third letter                           | Mental and behavioural disorder | Read |
| 9Ov3. | Depression monitoring verbal invite                          | Mental and behavioural disorder | Read |
| 9Ov4. | Depression monitoring telephone invite                       | Mental and behavioural disorder | Read |
| 9Ov.. | Depression monitoring administration                         | Mental and behavioural disorder | Read |
| E0013 | Presenile dementia with depression                           | Mental and behavioural disorder | Read |
| E0021 | Senile dementia with depression                              | Mental and behavioural disorder | Read |
| E0043 | Arteriosclerotic dementia with depression                    | Mental and behavioural disorder | Read |
| E1120 | Single major depressive episode, unspecified                 | Mental and behavioural disorder | Read |
| E1121 | Single major depressive episode, mild                        | Mental and behavioural disorder | Read |
| E1122 | Single major depressive episode, moderate                    | Mental and behavioural disorder | Read |
| E1123 | Single major depressive episode, severe, without psychosis   | Mental and behavioural disorder | Read |
| E1124 | Single major depressive episode, severe, with psychosis      | Mental and behavioural disorder | Read |
| E1125 | Single major depressive episode, partial or unspec remission | Mental and behavioural disorder | Read |
| E1126 | Single major depressive episode, in full remission           | Mental and behavioural disorder | Read |
| E112. | Single major depressive episode                              | Mental and behavioural disorder | Read |
| E112. | Agitated depression                                          | Mental and behavioural disorder | Read |
| E112. | Endogenous depression first episode                          | Mental and behavioural disorder | Read |
| E112. | Endogenous depression first episode                          | Mental and behavioural disorder | Read |

|       |                                                               |                                 |      |
|-------|---------------------------------------------------------------|---------------------------------|------|
|       |                                                               | behavioural disorder            |      |
| E112. | Endogenous depression                                         | Mental and behavioural disorder | Read |
| E112z | Single major depressive episode NOS                           | Mental and behavioural disorder | Read |
| E1130 | Recurrent major depressive episodes, unspecified              | Mental and behavioural disorder | Read |
| E1131 | Recurrent major depressive episodes, mild                     | Mental and behavioural disorder | Read |
| E1132 | Recurrent major depressive episodes, moderate                 | Mental and behavioural disorder | Read |
| E1133 | Recurrent major depressive episodes, severe, no psychosis     | Mental and behavioural disorder | Read |
| E1134 | Recurrent major depressive episodes, severe, with psychosis   | Mental and behavioural disorder | Read |
| E1135 | Recurrent major depressive episodes, partial/unspec remission | Mental and behavioural disorder | Read |
| E1136 | Recurrent major depressive episodes, in full remission        | Mental and behavioural disorder | Read |
| E1137 | Recurrent depression                                          | Mental and behavioural disorder | Read |
| E113. | Recurrent major depressive episode                            | Mental and behavioural disorder | Read |
| E113. | Endogenous depression - recurrent                             | Mental and behavioural disorder | Read |
| E113z | Recurrent major depressive episode NOS                        | Mental and behavioural disorder | Read |
| E118. | Seasonal affective disorder                                   | Mental and behavioural disorder | Read |
| E11.. | Depressive psychoses                                          | Mental and behavioural disorder | Read |
| E11y2 | Atypical depressive disorder                                  | Mental and behavioural disorder | Read |
| E11z2 | Masked depression                                             | Mental and behavioural disorder | Read |
| E130. | Reactive depressive psychosis                                 | Mental and behavioural disorder | Read |
| E130. | Psychotic reactive depression                                 | Mental and behavioural disorder | Read |
| E135. | Agitated depression                                           | Mental and behavioural disorder | Read |
| E2003 | Anxiety with depression                                       | Mental and behavioural disorder | Read |
| E291. | Prolonged depressive reaction                                 | Mental and behavioural disorder | Read |
| E2B1. | Chronic depression                                            | Mental and behavioural disorder | Read |
| E2B.. | Depressive disorder NEC                                       | Mental and behavioural disorder | Read |
| Eu204 | [X]Post-schizophrenic depression                              | Mental and                      | Read |

|       |                                                              |                                 |      |
|-------|--------------------------------------------------------------|---------------------------------|------|
|       |                                                              | behavioural disorder            |      |
| Eu251 | [X]Schizoaffective disorder, depressive type                 | Mental and behavioural disorder | Read |
| Eu251 | [X]Schizoaffective psychosis, depressive type                | Mental and behavioural disorder | Read |
| Eu251 | [X]Schizophreniform psychosis, depressive type               | Mental and behavioural disorder | Read |
| Eu320 | [X]Mild depressive episode                                   | Mental and behavioural disorder | Read |
| Eu321 | [X]Moderate depressive episode                               | Mental and behavioural disorder | Read |
| Eu322 | [X]Severe depressive episode without psychotic symptoms      | Mental and behavioural disorder | Read |
| Eu322 | [X]Single episode agitated depressn w/out psychotic symptoms | Mental and behavioural disorder | Read |
| Eu322 | [X]Single episode major depression w/out psychotic symptoms  | Mental and behavioural disorder | Read |
| Eu322 | [X]Single episode vital depression w/out psychotic symptoms  | Mental and behavioural disorder | Read |
| Eu323 | [X]Severe depressive episode with psychotic symptoms         | Mental and behavioural disorder | Read |
| Eu323 | [X]Single episode of major depression and psychotic symptoms | Mental and behavioural disorder | Read |
| Eu323 | [X]Single episode of psychogenic depressive psychosis        | Mental and behavioural disorder | Read |
| Eu323 | [X]Single episode of psychotic depression                    | Mental and behavioural disorder | Read |
| Eu323 | [X]Single episode of reactive depressive psychosis           | Mental and behavioural disorder | Read |
| Eu324 | [X]Mild depression                                           | Mental and behavioural disorder | Read |
| Eu325 | [X]Major depression, mild                                    | Mental and behavioural disorder | Read |
| Eu326 | [X]Major depression, moderately severe                       | Mental and behavioural disorder | Read |
| Eu327 | [X]Major depression, severe without psychotic symptoms       | Mental and behavioural disorder | Read |
| Eu328 | [X]Major depression, severe with psychotic symptoms          | Mental and behavioural disorder | Read |
| Eu329 | [X]Single major depr ep, severe with psych, psych in remiss  | Mental and behavioural disorder | Read |
| Eu32A | [X]Recurr major depr ep, severe with psych, psych in remiss  | Mental and behavioural disorder | Read |
| Eu32. | [X]Depressive episode                                        | Mental and behavioural disorder | Read |
| Eu32. | [X]Single episode of depressive reaction                     | Mental and behavioural disorder | Read |
| Eu32. | [X]Single episode of psychogenic depression                  | Mental and behavioural disorder | Read |
| Eu32. | [X]Single episode of reactive depression                     | Mental and                      | Read |

|       |                                                              |                                 |      |
|-------|--------------------------------------------------------------|---------------------------------|------|
|       |                                                              | behavioural disorder            |      |
| Eu32y | [X]Other depressive episodes                                 | Mental and behavioural disorder | Read |
| Eu32y | [X]Atypical depression                                       | Mental and behavioural disorder | Read |
| Eu32y | [X]Single episode of masked depression NOS                   | Mental and behavioural disorder | Read |
| Eu32z | [X]Depressive episode, unspecified                           | Mental and behavioural disorder | Read |
| Eu32z | [X]Depression NOS                                            | Mental and behavioural disorder | Read |
| Eu32z | [X]Depressive disorder NOS                                   | Mental and behavioural disorder | Read |
| Eu32z | [X]Prolonged single episode of reactive depression           | Mental and behavioural disorder | Read |
| Eu32z | [X] Reactive depression NOS                                  | Mental and behavioural disorder | Read |
| Eu330 | [X]Recurrent depressive disorder, current episode mild       | Mental and behavioural disorder | Read |
| Eu331 | [X]Recurrent depressive disorder, current episode moderate   | Mental and behavioural disorder | Read |
| Eu332 | [X]Recurr depress disorder cur epi severe without psyc sympt | Mental and behavioural disorder | Read |
| Eu332 | [X]Endogenous depression without psychotic symptoms          | Mental and behavioural disorder | Read |
| Eu332 | [X]Major depression, recurrent without psychotic symptoms    | Mental and behavioural disorder | Read |
| Eu332 | [X]Manic-depress psychosis,depressed, no psychotic symptoms  | Mental and behavioural disorder | Read |
| Eu332 | [X]Vital depression, recurrent without psychotic symptoms    | Mental and behavioural disorder | Read |
| Eu333 | [X]Recurrent depress disorder cur epi severe with psyc symp  | Mental and behavioural disorder | Read |
| Eu333 | [X]Endogenous depression with psychotic symptoms             | Mental and behavioural disorder | Read |
| Eu333 | [X]Manic-depress psychosis,depressed type+psychotic symptoms | Mental and behavioural disorder | Read |
| Eu333 | [X]Recurr severe episodes/major depression+psychotic symptom | Mental and behavioural disorder | Read |
| Eu333 | [X]Recurr severe episodes/psychogenic depressive psychosis   | Mental and behavioural disorder | Read |
| Eu333 | [X]Recurrent severe episodes of psychotic depression         | Mental and behavioural disorder | Read |
| Eu333 | [X]Recurrent severe episodes/reactive depressive psychosis   | Mental and behavioural disorder | Read |
| Eu334 | [X]Recurrent depressive disorder, currently in remission     | Mental and behavioural disorder | Read |
| Eu33. | [X]Recurrent depressive disorder                             | Mental and behavioural disorder | Read |
| Eu33. | [X]Recurrent episodes of depressive reaction                 | Mental and behavioural disorder | Read |

|       |                                                        |                                 |      |
|-------|--------------------------------------------------------|---------------------------------|------|
|       |                                                        | behavioural disorder            |      |
| Eu33. | [X]Recurrent episodes of psychogenic depression        | Mental and behavioural disorder | Read |
| Eu33. | [X]Recurrent episodes of reactive depression           | Mental and behavioural disorder | Read |
| Eu33. | [X]Seasonal depressive disorder                        | Mental and behavioural disorder | Read |
| Eu33. | [X]SAD - Seasonal affective disorder                   | Mental and behavioural disorder | Read |
| Eu33y | [X]Other recurrent depressive disorders                | Mental and behavioural disorder | Read |
| Eu33z | [X]Recurrent depressive disorder, unspecified          | Mental and behavioural disorder | Read |
| Eu33z | [X]Monopolar depression NOS                            | Mental and behavioural disorder | Read |
| Eu341 | [X]Dysthymia                                           | Mental and behavioural disorder | Read |
| Eu341 | [X]Depressive neurosis                                 | Mental and behavioural disorder | Read |
| Eu341 | [X]Depressive personality disorder                     | Mental and behavioural disorder | Read |
| Eu341 | [X]Neurotic depression                                 | Mental and behavioural disorder | Read |
| Eu341 | [X]Persistant anxiety depression                       | Mental and behavioural disorder | Read |
| Eu412 | [X]Mixed anxiety and depressive disorder               | Mental and behavioural disorder | Read |
| Eu412 | [X]Mild anxiety depression                             | Mental and behavioural disorder | Read |
| E2030 | Compulsive neurosis                                    | Mental and behavioural disorder | Read |
| E2031 | Obsessional neurosis                                   | Mental and behavioural disorder | Read |
| E203. | Obsessive-compulsive disorders                         | Mental and behavioural disorder | Read |
| E203. | Anancastic neurosis                                    | Mental and behavioural disorder | Read |
| E203z | Obsessive-compulsive disorder NOS                      | Mental and behavioural disorder | Read |
| Eu420 | [X]Predominantly obsessional thoughts or ruminations   | Mental and behavioural disorder | Read |
| Eu421 | [X]Predominantly compulsive acts [obsessional rituals] | Mental and behavioural disorder | Read |
| Eu422 | [X]Mixed obsessional thoughts and acts                 | Mental and behavioural disorder | Read |
| Eu42. | [X]Obsessive - compulsive disorder                     | Mental and behavioural disorder | Read |
| Eu42. | [X]Anankastic neurosis                                 | Mental and behavioural disorder | Read |
| Eu42. | [X]Obsessive-compulsive neurosis                       | Mental and                      | Read |

|       |                                                         |                                 |      |
|-------|---------------------------------------------------------|---------------------------------|------|
|       |                                                         | behavioural disorder            |      |
| Eu42y | [X]Other obsessive-compulsive disorders                 | Mental and behavioural disorder | Read |
| Eu42z | [X]Obsessive-compulsive disorder, unspecified           | Mental and behavioural disorder | Read |
| 1464. | H/O: schizophrenia                                      | Mental and behavioural disorder | Read |
| 146H. | H/O: psychosis                                          | Mental and behavioural disorder | Read |
| 212W  | Schizophrenia resolved                                  | Mental and behavioural disorder | Read |
| 212X. | Psychosis resolved                                      | Mental and behavioural disorder | Read |
| 285.. | Psychotic condition, insight present                    | Mental and behavioural disorder | Read |
| 286.. | Poor insight into psychotic condition                   | Mental and behavioural disorder | Read |
| E1000 | Unspecified schizophrenia                               | Mental and behavioural disorder | Read |
| E1001 | Subchronic schizophrenia                                | Mental and behavioural disorder | Read |
| E1002 | Chronic schizophrenic                                   | Mental and behavioural disorder | Read |
| E1003 | Acute exacerbation of subchronic schizophrenia          | Mental and behavioural disorder | Read |
| E1004 | Acute exacerbation of chronic schizophrenia             | Mental and behavioural disorder | Read |
| E1005 | Schizophrenia in remission                              | Mental and behavioural disorder | Read |
| E100. | Simple schizophrenia                                    | Mental and behavioural disorder | Read |
| E100. | Schizophrenia simplex                                   | Mental and behavioural disorder | Read |
| E100z | Simple schizophrenia NOS                                | Mental and behavioural disorder | Read |
| E1010 | Unspecified hebephrenic schizophrenia                   | Mental and behavioural disorder | Read |
| E1014 | Acute exacerbation of chronic hebephrenic schizophrenia | Mental and behavioural disorder | Read |
| E1015 | Hebephrenic schizophrenia in remission                  | Mental and behavioural disorder | Read |
| E101. | Hebephrenic schizophrenia                               | Mental and behavioural disorder | Read |
| E101z | Hebephrenic schizophrenia NOS                           | Mental and behavioural disorder | Read |
| E1020 | Unspecified catatonic schizophrenia                     | Mental and behavioural disorder | Read |
| E1021 | Subchronic catatonic schizophrenia                      | Mental and behavioural disorder | Read |
| E1024 | Acute exacerbation of chronic catatonic schizophrenia   | Mental and                      | Read |

|       |                                                              |                                 |      |
|-------|--------------------------------------------------------------|---------------------------------|------|
|       |                                                              | behavioural disorder            |      |
| E1025 | Catatonic schizophrenia in remission                         | Mental and behavioural disorder | Read |
| E102. | Catatonic schizophrenia                                      | Mental and behavioural disorder | Read |
| E102z | Catatonic schizophrenia NOS                                  | Mental and behavioural disorder | Read |
| E1030 | Unspecified paranoid schizophrenia                           | Mental and behavioural disorder | Read |
| E1031 | Subchronic paranoid schizophrenia                            | Mental and behavioural disorder | Read |
| E1032 | Chronic paranoid schizophrenia                               | Mental and behavioural disorder | Read |
| E1033 | Acute exacerbation of subchronic paranoid schizophrenia      | Mental and behavioural disorder | Read |
| E1034 | Acute exacerbation of chronic paranoid schizophrenia         | Mental and behavioural disorder | Read |
| E1035 | Paranoid schizophrenia in remission                          | Mental and behavioural disorder | Read |
| E103. | Paranoid schizophrenia                                       | Mental and behavioural disorder | Read |
| E103z | Paranoid schizophrenia NOS                                   | Mental and behavioural disorder | Read |
| E1050 | Unspecified latent schizophrenia                             | Mental and behavioural disorder | Read |
| E1052 | Chronic latent schizophrenia                                 | Mental and behavioural disorder | Read |
| E1055 | Latent schizophrenia in remission                            | Mental and behavioural disorder | Read |
| E105. | Latent schizophrenia                                         | Mental and behavioural disorder | Read |
| E105z | Latent schizophrenia NOS                                     | Mental and behavioural disorder | Read |
| E106. | Residual schizophrenia                                       | Mental and behavioural disorder | Read |
| E1070 | Unspecified schizo-affective schizophrenia                   | Mental and behavioural disorder | Read |
| E1071 | Subchronic schizo-affective schizophrenia                    | Mental and behavioural disorder | Read |
| E1072 | Chronic schizo-affective schizophrenia                       | Mental and behavioural disorder | Read |
| E1073 | Acute exacerbation subchronic schizo-affective schizophrenia | Mental and behavioural disorder | Read |
| E1074 | Acute exacerbation of chronic schizo-affective schizophrenia | Mental and behavioural disorder | Read |
| E1075 | Schizo-affective schizophrenia in remission                  | Mental and behavioural disorder | Read |
| E107. | Schizo-affective schizophrenia                               | Mental and behavioural disorder | Read |
| E107. | Cyclic schizophrenia                                         | Mental and                      | Read |



|       |                                       |                                 |      |
|-------|---------------------------------------|---------------------------------|------|
|       |                                       | behavioural disorder            |      |
| E107z | Schizo-affective schizophrenia NOS    | Mental and behavioural disorder | Read |
| E10.. | Schizophrenic disorders               | Mental and behavioural disorder | Read |
| E10y0 | Atypical schizophrenia                | Mental and behavioural disorder | Read |
| E10y1 | Coenesthopathic schizophrenia         | Mental and behavioural disorder | Read |
| E10y. | Other schizophrenia                   | Mental and behavioural disorder | Read |
| E10y. | Cenesthopathic schizophrenia          | Mental and behavioural disorder | Read |
| E10yz | Other schizophrenia NOS               | Mental and behavioural disorder | Read |
| E10z. | Schizophrenia NOS                     | Mental and behavioural disorder | Read |
| E120. | Simple paranoid state                 | Mental and behavioural disorder | Read |
| E121. | Chronic paranoid psychosis            | Mental and behavioural disorder | Read |
| E121. | Sander's disease                      | Mental and behavioural disorder | Read |
| E122. | Paraphrenia                           | Mental and behavioural disorder | Read |
| E12.. | Paranoid states                       | Mental and behavioural disorder | Read |
| E12y0 | Paranoia querulans                    | Mental and behavioural disorder | Read |
| E12y. | Other paranoid states                 | Mental and behavioural disorder | Read |
| E12yz | Other paranoid states NOS             | Mental and behavioural disorder | Read |
| E12z. | Paranoid psychosis NOS                | Mental and behavioural disorder | Read |
| E1... | Non-organic psychoses                 | Mental and behavioural disorder | Read |
| E1y.. | Other specified non-organic psychoses | Mental and behavioural disorder | Read |
| E1z.. | Non-organic psychosis NOS             | Mental and behavioural disorder | Read |
| Eu200 | [X]Paranoid schizophrenia             | Mental and behavioural disorder | Read |
| Eu200 | [X]Paraphrenic schizophrenia          | Mental and behavioural disorder | Read |
| Eu201 | [X]Hebephrenic schizophrenia          | Mental and behavioural disorder | Read |
| Eu201 | [X]Disorganised schizophrenia         | Mental and behavioural disorder | Read |
| Eu202 | [X]Catatonic schizophrenia            | Mental and                      | Read |

|       |                                           |                                 |      |
|-------|-------------------------------------------|---------------------------------|------|
|       |                                           | behavioural disorder            |      |
| Eu202 | [X]Catatonic stupor                       | Mental and behavioural disorder | Read |
| Eu202 | [X]Schizophrenic catalepsy                | Mental and behavioural disorder | Read |
| Eu202 | [X]Schizophrenic catatonia                | Mental and behavioural disorder | Read |
| Eu202 | [X]Schizophrenic flexibilitas cerea       | Mental and behavioural disorder | Read |
| Eu203 | [X]Undifferentiated schizophrenia         | Mental and behavioural disorder | Read |
| Eu203 | [X]Atypical schizophrenia                 | Mental and behavioural disorder | Read |
| Eu204 | [X]Post-schizophrenic depression          | Mental and behavioural disorder | Read |
| Eu205 | [X]Residual schizophrenia                 | Mental and behavioural disorder | Read |
| Eu205 | [X]Chronic undifferentiated schizophrenia | Mental and behavioural disorder | Read |
| Eu206 | [X]Simple schizophrenia                   | Mental and behavioural disorder | Read |
| Eu20. | [X]Schizophrenia                          | Mental and behavioural disorder | Read |
| Eu20y | [X]Other schizophrenia                    | Mental and behavioural disorder | Read |
| Eu20y | [X]Schizophreniform disord NOS            | Mental and behavioural disorder | Read |
| Eu20y | [X]Schizophreniform psychos NOS           | Mental and behavioural disorder | Read |
| Eu20z | [X]Schizophrenia, unspecified             | Mental and behavioural disorder | Read |
| Eu21. | [X]Schizotypal disorder                   | Mental and behavioural disorder | Read |
| Eu21. | [X]Latent schizophrenic reaction          | Mental and behavioural disorder | Read |
| Eu21. | [X]Borderline schizophrenia               | Mental and behavioural disorder | Read |
| Eu21. | [X]Latent schizophrenia                   | Mental and behavioural disorder | Read |
| Eu21. | [X]Prepsychotic schizophrenia             | Mental and behavioural disorder | Read |
| Eu21. | [X]Prodromal schizophrenia                | Mental and behavioural disorder | Read |
| Eu21. | [X]Pseudoneurotic schizophrenia           | Mental and behavioural disorder | Read |
| Eu21. | [X]Pseudopsychopathic schizophrenia       | Mental and behavioural disorder | Read |
| Eu220 | [X]Delusional disorder                    | Mental and behavioural disorder | Read |
| Eu220 | [X]Paranoid psychosis                     | Mental and                      | Read |

|       |                                                |                                 |      |
|-------|------------------------------------------------|---------------------------------|------|
|       |                                                | behavioural disorder            |      |
| Eu220 | [X]Paranoid state                              | Mental and behavioural disorder | Read |
| Eu220 | [X]Paraphrenia - late                          | Mental and behavioural disorder | Read |
| Eu220 | [X]Sensitiver Beziehungswahn                   | Mental and behavioural disorder | Read |
| Eu220 | [X]Paranoia                                    | Mental and behavioural disorder | Read |
| Eu221 | [X]Delusional misidentification syndrome       | Mental and behavioural disorder | Read |
| Eu221 | [X]Capgras syndrome                            | Mental and behavioural disorder | Read |
| Eu222 | [X]Cotard syndrome                             | Mental and behavioural disorder | Read |
| Eu223 | [X]Paranoid state in remission                 | Mental and behavioural disorder | Read |
| Eu22. | [X]Persistent delusional disorders             | Mental and behavioural disorder | Read |
| Eu22y | [X]Other persistent delusional disorders       | Mental and behavioural disorder | Read |
| Eu22y | [X]Delusional dysmorphophobia                  | Mental and behavioural disorder | Read |
| Eu22y | [X]Involutional paranoid state                 | Mental and behavioural disorder | Read |
| Eu22y | [X]Paranoia querulans                          | Mental and behavioural disorder | Read |
| Eu22z | [X]Persistent delusional disorder, unspecified | Mental and behavioural disorder | Read |
| Eu250 | [X]Schizoaffective disorder, manic type        | Mental and behavioural disorder | Read |
| Eu250 | [X]Schizoaffective psychosis, manic type       | Mental and behavioural disorder | Read |
| Eu250 | [X]Schizophreniform psychosis, manic type      | Mental and behavioural disorder | Read |
| Eu251 | [X]Schizoaffective disorder, depressive type   | Mental and behavioural disorder | Read |
| Eu251 | [X]Schizoaffective psychosis, depressive type  | Mental and behavioural disorder | Read |
| Eu251 | [X]Schizophreniform psychosis, depressive type | Mental and behavioural disorder | Read |
| Eu252 | [X]Schizoaffective disorder, mixed type        | Mental and behavioural disorder | Read |
| Eu252 | [X]Cyclic schizophrenia                        | Mental and behavioural disorder | Read |
| Eu252 | [X]Mixed schizophrenic and affective psychosis | Mental and behavioural disorder | Read |
| Eu25. | [X]Schizoaffective disorders                   | Mental and behavioural disorder | Read |
| Eu25y | [X]Other schizoaffective disorders             | Mental and                      | Read |

|       |                                                                  |                                 |        |
|-------|------------------------------------------------------------------|---------------------------------|--------|
|       |                                                                  | behavioural disorder            |        |
| Eu25z | [X]Schizoaffective disorder, unspecified                         | Mental and behavioural disorder | Read   |
| Eu25z | [X]Schizoaffective psychosis NOS                                 | Mental and behavioural disorder | Read   |
| Eu26. | [X]Nonorganic psychosis in remission                             | Mental and behavioural disorder | Read   |
| Eu2.. | [X]Schizophrenia, schizotypal and delusional disorders           | Mental and behavioural disorder | Read   |
| Eu2y. | [X]Other nonorganic psychotic disorders                          | Mental and behavioural disorder | Read   |
| Eu2y. | [X]Chronic hallucinatory psychosis                               | Mental and behavioural disorder | Read   |
| Eu2z. | [X]Unspecified nonorganic psychosis                              | Mental and behavioural disorder | Read   |
| Eu2z. | [X]Psychosis NOS                                                 | Mental and behavioural disorder | Read   |
| ZV110 | [V]Personal history of schizophrenia                             | Mental and behavioural disorder | Read   |
| F90.  | Diagnosis of Hyperkinetic disorders                              | Mental and behavioural disorder | ICD-10 |
| F40.  | Diagnosis of Anxiety disorders                                   | Mental and behavioural disorder | ICD-10 |
| F41.  | Diagnosis of Anxiety disorders                                   | Mental and behavioural disorder | ICD-10 |
| F84.  | Diagnosis of Autism and Asperger's syndrome                      | Mental and behavioural disorder | ICD-10 |
| F84.  | Diagnosis of Autism and Asperger's syndrome                      | Mental and behavioural disorder | ICD-10 |
| F84.  | Diagnosis of Autism and Asperger's syndrome                      | Mental and behavioural disorder | ICD-10 |
| F30.  | Diagnosis of Bipolar affective disorder and mania                | Mental and behavioural disorder | ICD-10 |
| F31.  | Diagnosis of Bipolar affective disorder and mania                | Mental and behavioural disorder | ICD-10 |
| F32.  | Diagnosis of Depression                                          | Mental and behavioural disorder | ICD-10 |
| F33.  | Diagnosis of Depression                                          | Mental and behavioural disorder | ICD-10 |
| F42.  | Diagnosis of Obsessive-compulsive disorder                       | Mental and behavioural disorder | ICD-10 |
| F20.  | Diagnosis of Schizophrenia, schizotypal and delusional disorders | Mental and behavioural disorder | ICD-10 |
| F21.  | Diagnosis of Schizophrenia, schizotypal and delusional disorders | Mental and behavioural disorder | ICD-10 |
| F22.  | Diagnosis of Schizophrenia, schizotypal and delusional disorders | Mental and behavioural disorder | ICD-10 |
| F25.  | Diagnosis of Schizophrenia, schizotypal and delusional disorders | Mental and behavioural disorder | ICD-10 |
| F28.  | Diagnosis of Schizophrenia, schizotypal and delusional           | Mental and                      | ICD-   |

|       |                                                                  |                                 |        |
|-------|------------------------------------------------------------------|---------------------------------|--------|
|       | disorders                                                        | behavioural disorder            | 10     |
| F29.  | Diagnosis of Schizophrenia, schizotypal and delusional disorders | Mental and behavioural disorder | ICD-10 |
| U2zy. | [X]Intent self harm by unspecif means occ oth specif place       | Mental and behavioural disorder | Read   |
| U20By | [X]Int self poison other gas/vapour other spec place             | Mental and behavioural disorder | Read   |
| U241. |                                                                  | Mental and behavioural disorder | Read   |
| ZX1Q. | Throwing self in front of train                                  | Mental and behavioural disorder | Read   |
| U20B0 | [X]Int self poison/exposure to other gas/vapour at home          | Mental and behavioural disorder | Read   |
| U206. | [X]Intent self poison/exposure to hallucinogen                   | Mental and behavioural disorder | Read   |
| U200. | [X]Overdose - ibuprofen                                          | Mental and behavioural disorder | Read   |
| U200. | [X]Overdose - aspirin                                            | Mental and behavioural disorder | Read   |
| TKxz. | Suicide and selfinflicted injury by other means NOS              | Mental and behavioural disorder | Read   |
| U200. | [X]Overdose - paracetamol                                        | Mental and behavioural disorder | Read   |
| U22.. | [X]Intentional self harm by drowning and submersion              | Mental and behavioural disorder | Read   |
| U20yz | [X]Intent self poison unspecif chemical unspecif place           | Mental and behavioural disorder | Read   |
| TKx.. | Suicide and selfinflicted injury by other means                  | Mental and behavioural disorder | Read   |
| U208z | [X]Intent self poison oth/unsp drug/medic unspecif place         | Mental and behavioural disorder | Read   |
| U202y | [X]Int self poison sedative hypnotic other spec place            | Mental and behavioural disorder | Read   |
| TK3z. | Suicide + selfinflicted inj by hang/strangle/suffocate NOS       | Mental and behavioural disorder | Read   |
| U212. | [X]Inten slf harm hang strang/suffc sch oth ins/pub adm area     | Mental and behavioural disorder | Read   |
| U2B0. | [X]Intent self harm by jumping from high place occ at home       | Mental and behavioural disorder | Read   |
| U20A. | [X]Intentional self poison organ solvent,halogen hydrocarb       | Mental and behavioural disorder | Read   |
| ZX1K. | Setting fire to self                                             | Mental and behavioural disorder | Read   |
| TK11. | Suicide + selfinflicted poisoning by liquified petrol gas        | Mental and behavioural disorder | Read   |
| ZX1K. | Setting self alight                                              | Mental and behavioural disorder | Read   |
| U200. | [X]Intent self poison/exposure to nonopioid analgesic            | Mental and behavioural disorder | Read   |
| U2D.. | [X]Intentional self harm by crashing of motor vehicle            | Mental and                      | Read   |

|       |                                                              |                                 |      |
|-------|--------------------------------------------------------------|---------------------------------|------|
|       |                                                              | behavioural disorder            |      |
| ZX1H1 | Self-strangulation                                           | Mental and behavioural disorder | Read |
| TK05. | Suicide + selfinflicted poisoning by drug or medicine NOS    | Mental and behavioural disorder | Read |
| TK3.. | Suicide + selfinflicted injury by hang/strangulate/suffocate | Mental and behavioural disorder | Read |
| U270. | [X]Intention self harm by smoke fire/flames occurrn at home  | Mental and behavioural disorder | Read |
| TK010 | Suicide and self inflicted injury by Amylobarbitone          | Mental and behavioural disorder | Read |
| U20A. | [X]Self poisoning from glue solvent                          | Mental and behavioural disorder | Read |
| ZX1K. | Self-incineration                                            | Mental and behavioural disorder | Read |
| U21y. | [X]Intent self harm by hangng strangul/suffoct oth spec plce | Mental and behavioural disorder | Read |
| U2080 | [X]Int self poison/exposure to oth/unsp drug/medicam home    | Mental and behavioural disorder | Read |
| U2A.. | [X]Intentional self harm by blunt object                     | Mental and behavioural disorder | Read |
| TK6.. | Suicide and selfinflicted injury by cutting and stabbing     | Mental and behavioural disorder | Read |
| U20y0 | [X]Int self poison/exposure to unspecif chemical at home     | Mental and behavioural disorder | Read |
| U26.. | [X]Intentional self harm by explosive material               | Mental and behavioural disorder | Read |
| U2010 | [X]Int self poison/exposure to antiepileptic at home         | Mental and behavioural disorder | Read |
| U2z.. | [X]Intentional self harm by unspecified means                | Mental and behavioural disorder | Read |
| ZX1B1 | Jumping from building                                        | Mental and behavioural disorder | Read |
| U29z. | [X]Intentional self harm by sharp object occ unspecif place  | Mental and behavioural disorder | Read |
| TK04. | Suicide + selfinflicted poisoning by other drugs/medicines   | Mental and behavioural disorder | Read |
| U2Cy. | [X]Int self harm jump/lying bef mov obje occ oth specif plce | Mental and behavioural disorder | Read |
| TK7z. | Suicide+selfinflicted injury-jump from high place NOS        | Mental and behavioural disorder | Read |
| TK52. | Suicide and selfinflicted injury by hunting rifle            | Mental and behavioural disorder | Read |
| TK10. | Suicide + selfinflicted poisoning by gas via pipeline        | Mental and behavioural disorder | Read |
| U208y | [X]Int self poison oth/unsp drug/medic other spec place      | Mental and behavioural disorder | Read |
| TKx00 | Suicide + selfinflicted injury-jumping before moving object  | Mental and behavioural disorder | Read |
| 14K1. | Intentional overdose of prescription only medication         | Mental and                      | Read |

|           |                                                              |                                 |      |
|-----------|--------------------------------------------------------------|---------------------------------|------|
|           |                                                              | behavioural disorder            |      |
| U30..     | [X]Deliberate drug poisoning                                 | Mental and behavioural disorder | Read |
| TKx4.     | Suicide and selfinflicted injury by electrocution            | Mental and behavioural disorder | Read |
| U20C<br>y | [X]Int self poison pesticide other spec place                | Mental and behavioural disorder | Read |
| U20C<br>0 |                                                              | Mental and behavioural disorder | Read |
| U207.     | [X]Intent self poison/exposure to oth autonomic drug         | Mental and behavioural disorder | Read |
| ZX15.     | Drowning self                                                | Mental and behavioural disorder | Read |
| TK0z.     | Suicide + selfinflicted poisoning by solid/liquid subst NOS  | Mental and behavioural disorder | Read |
| U209z     | [X]Intent self poison alcohol unspecif place                 | Mental and behavioural disorder | Read |
| ZX1H2     | Self-suffocation                                             | Mental and behavioural disorder | Read |
| U22z.     | [X]Intent self harm by drown/submersn occ unspecified place  | Mental and behavioural disorder | Read |
| TK601     | Self inflicted lacerations to wrist                          | Mental and behavioural disorder | Read |
| U20B.     | [X]Intent self poison/exposure to other gas/vapour           | Mental and behavioural disorder | Read |
| U45..     | [X]Other+unspecified firearm discharge undetermined intent   | Mental and behavioural disorder | Read |
| TK011     | Suicide and self inflicted injury by Barbitone               | Mental and behavioural disorder | Read |
| U2D4.     | [X]Intent self harm by crash motor vehicl occ street/highway | Mental and behavioural disorder | Read |
| TKx5.     | Suicide and selfinflicted injury by crashing motor vehicle   | Mental and behavioural disorder | Read |
| U216.     | [X]Intent self harm by hang strangl/suffc indust/constr area | Mental and behavioural disorder | Read |
| U20B<br>2 | [X]Int self poison other gas/vapour school/pub admin area    | Mental and behavioural disorder | Read |
| TK2..     | Suicide + selfinflicted poisoning by other gases and vapours | Mental and behavioural disorder | Read |
| U2A0.     | [X]Intentional self harm by blunt object occurrence at home  | Mental and behavioural disorder | Read |
| U2E..     | [X]Self mutilation                                           | Mental and behavioural disorder | Read |
| ZX1B2     | Jumping from bridge                                          | Mental and behavioural disorder | Read |
| ZX1E.     | Pinching self                                                | Mental and behavioural disorder | Read |
| U72..     | [X]Sequel intentn self-harm assault+event of undeterm intent | Mental and behavioural disorder | Read |
| TK06.     | Suicide + selfinflicted poisoning by agricultural chemical   | Mental and                      | Read |

|       |                                                              |                                 |      |
|-------|--------------------------------------------------------------|---------------------------------|------|
|       |                                                              | behavioural disorder            |      |
| U2y0. | [X]Intentionl self harm by oth specif means occurrn at home  | Mental and behavioural disorder | Read |
| U20A0 | [X]Intent self pois organ solvent,halogen hydrocarb, home    | Mental and behavioural disorder | Read |
| ZX1J. | Self-electrocution                                           | Mental and behavioural disorder | Read |
| U2004 |                                                              | Mental and behavioural disorder | Read |
| ZX1L1 | Self-mutilation of hands                                     | Mental and behavioural disorder | Read |
| SL... | Overdose of drug                                             | Mental and behavioural disorder | Read |
| SL... | Overdose of biological substance                             | Mental and behavioural disorder | Read |
| U205. | [X]Intent self poison/exposure to narcotic drug              | Mental and behavioural disorder | Read |
| ZRLfC | HoNOS item 2 - non-accidental self injury                    | Mental and behavioural disorder | Read |
| TK01. | Suicide + selfinflicted poisoning by barbiturates            | Mental and behavioural disorder | Read |
| U207z | [X]Intent self poison oth autonomic drug unspecif place      | Mental and behavioural disorder | Read |
| U280. | [X]Intent self harm by steam hot vapour/hot obj occ at home  | Mental and behavioural disorder | Read |
| U274. | [X]Intent self harm by smoke fire/flame occ street/highway   | Mental and behavioural disorder | Read |
| TK3y. | Suicide + selfinflicted inj oth mean hang/strangle/suffocate | Mental and behavioural disorder | Read |
| U211. | [X]Intent self harm by hangng strangult/suffoct resid instit | Mental and behavioural disorder | Read |
| TK7.. | Suicide and selfinflicted injury by jumping from high place  | Mental and behavioural disorder | Read |
| U20Bz | [X]Intent self poison other gas/vapour unspecif place        | Mental and behavioural disorder | Read |
| U291. | [X]Intent self harm by sharp object occ resident instit'n    | Mental and behavioural disorder | Read |
| U2C1. |                                                              | Mental and behavioural disorder | Read |
| ZX1B3 | Jumping from cliff                                           | Mental and behavioural disorder | Read |
| U2z2. | [X]Intent self harm by unspec mean occ sch/ins/pub adm area  | Mental and behavioural disorder | Read |
| U20y2 | [X]Int self poison unspecif chemical school/pub admin area   | Mental and behavioural disorder | Read |
| U201. | [X]Intent self poison/exposure to antiepileptic              | Mental and behavioural disorder | Read |
| U2... | [X]Self inflicted injury                                     | Mental and behavioural disorder | Read |
| U2... | [X]Suicide                                                   | Mental and                      | Read |



|       |                                                              |                                 |      |
|-------|--------------------------------------------------------------|---------------------------------|------|
|       |                                                              | behavioural disorder            |      |
| TK... | Cause of overdose - deliberate                               | Mental and behavioural disorder | Read |
| U2... | [X]Injury - self-inflicted                                   | Mental and behavioural disorder | Read |
| U2... | [X]Para-suicide                                              | Mental and behavioural disorder | Read |
| U2... | [X]Attempted suicide                                         | Mental and behavioural disorder | Read |
| TK00. | Suicide + selfinflicted poisoning by analgesic/antipyretic   | Mental and behavioural disorder | Read |
| U22y. | [X]Intent self harm by drown/submersn occ oth specif place   | Mental and behavioural disorder | Read |
| TK... | Para-suicide                                                 | Mental and behavioural disorder | Read |
| U202z | [X]Intent self poison sedative hypnotic unspecif place       | Mental and behavioural disorder | Read |
| TK... | Injury - self-inflicted                                      | Mental and behavioural disorder | Read |
| TK... | Poisoning - self-inflicted                                   | Mental and behavioural disorder | Read |
| TK... | Suicide and self harm                                        | Mental and behavioural disorder | Read |
| U28z. | [X]Intent self harm by steam hot vapour/obj occ unspec place | Mental and behavioural disorder | Read |
| TK... | Attempted suicide                                            | Mental and behavioural disorder | Read |
| ZX19. | Hitting self                                                 | Mental and behavioural disorder | Read |
| U2B6. | [X]Int self harm by jump from high place indust/constr area  | Mental and behavioural disorder | Read |
| TKx0. | Suicide + selfinflicted injury-jump/lie before moving object | Mental and behavioural disorder | Read |
| U2005 | [X]Intent self pois nonopioid analgesic trade/service area   | Mental and behavioural disorder | Read |
| ZX1L2 | Self-mutilation of genitalia                                 | Mental and behavioural disorder | Read |
| U2020 | [X]Int self poison/exposure to sedative hypnotic at home     | Mental and behavioural disorder | Read |
| U2070 | [X]Int self poison/exposure to oth autonomic drug at home    | Mental and behavioural disorder | Read |
| U2... | [X]Intentional self-harm                                     | Mental and behavioural disorder | Read |
| SL90. | Antidepressant poisoning                                     | Mental and behavioural disorder | Read |
| TK... | Suicide and selfinflicted injury                             | Mental and behavioural disorder | Read |
| TK51. | Suicide and selfinflicted injury by shotgun                  | Mental and behavioural disorder | Read |
| U44.. | [X]Rifle shotgun+larger firearm discharge undetermin         | Mental and                      | Read |

|       |                                                              |                                 |      |
|-------|--------------------------------------------------------------|---------------------------------|------|
|       | intent                                                       | behavioural disorder            |      |
| ZX1.. | Deliberate self-harm                                         | Mental and behavioural disorder | Read |
| ZX1.. | SIB - Self-injurious behaviour                               | Mental and behavioural disorder | Read |
| U27.. | [X]Intentional self harm by smoke, fire and flames           | Mental and behavioural disorder | Read |
| U2y1. | [X]Intent self harm by oth specif means occ resid instit'n   | Mental and behavioural disorder | Read |
| U2D6. | [X]Intent self harm crash motor vehic occ indust/constr area | Mental and behavioural disorder | Read |
| TKx1. | Suicide and selfinflicted injury by burns or fire            | Mental and behavioural disorder | Read |
| U4B.. | [X]Falling jumping/pushed from high place undeterm intent    | Mental and behavioural disorder | Read |
| SLHz. | Drug and medicament poisoning NOS                            | Mental and behavioural disorder | Read |
| U2z0. | [X]Intentional self harm by unspecif means occurrn at home   | Mental and behavioural disorder | Read |
| TK60. | Suicide and selfinflicted injury by cutting                  | Mental and behavioural disorder | Read |
| ZX13. | Cuts self                                                    | Mental and behavioural disorder | Read |
| U4Bz. | [X]Fall jump/push frm high plce undt intnt occ unspecif plce | Mental and behavioural disorder | Read |
| ZX1.. | Self-injurious behaviour                                     | Mental and behavioural disorder | Read |
| TK54. | Suicide and selfinflicted injury by other firearm            | Mental and behavioural disorder | Read |
| U250. |                                                              | Mental and behavioural disorder | Read |
| TK1.. | Suicide + selfinflicted poisoning by gases in domestic use   | Mental and behavioural disorder | Read |
| TK31. | Suicide + selfinflicted injury by suffocation by plastic bag | Mental and behavioural disorder | Read |
| TK02. | Suicide + selfinflicted poisoning by oth sedatives/hypnotics | Mental and behavioural disorder | Read |
| ZX1I. | Self-scalding                                                | Mental and behavioural disorder | Read |
| U200z | [X]Intent self poison nonopioid analgesic unspecif place     | Mental and behavioural disorder | Read |
| U24.. | [X]Intent self harm by rifle shotgun/larger firearm disch    | Mental and behavioural disorder | Read |
| TKx6. | Suicide and selfinflicted injury by crashing of aircraft     | Mental and behavioural disorder | Read |
| ZX1N. | Stabbing self                                                | Mental and behavioural disorder | Read |
| U290. | [X]Intentional self harm by sharp object occurrence at home  | Mental and behavioural disorder | Read |
| U221. | [X]Intent self harm by drowning/submersn occ resid           | Mental and                      | Read |

|       |                                                             |                                 |      |
|-------|-------------------------------------------------------------|---------------------------------|------|
|       | instit'n                                                    | behavioural disorder            |      |
| ZX... | Self-damage                                                 | Mental and behavioural disorder | Read |
| U209. | [X]Intent self poison/exposure to alcohol                   | Mental and behavioural disorder | Read |
| ZX13. | Cutting self                                                | Mental and behavioural disorder | Read |
| ZX1L3 | Self-mutilation of penis                                    | Mental and behavioural disorder | Read |
| U2050 | [X]Int self poison/exposure to narcotic drug at home        | Mental and behavioural disorder | Read |
| U2A1. | [X]Intent self harm by blunt object occ resident instit'n   | Mental and behavioural disorder | Read |
| U205y | [X]Int self poison narcotic drug other spec place           | Mental and behavioural disorder | Read |
| U2yz. | [X]Intent self harm by oth specif means occ unspecif place  | Mental and behavioural disorder | Read |
| TK5z. | Suicide and selfinflicted injury by firearms/explosives NOS | Mental and behavioural disorder | Read |
| TK014 | Suicide and self inflicted injury by Phenobarbitone         | Mental and behavioural disorder | Read |
| TKx7. | Suicide and selfinflicted injury caustic subst, excl poison | Mental and behavioural disorder | Read |
| U2Bz. | [X]Int self harm by jump from high place occ unspecif place | Mental and behavioural disorder | Read |
| U202. | [X]Overdose - amobarbital                                   | Mental and behavioural disorder | Read |
| U202. | [X]Overdose - barbiturate                                   | Mental and behavioural disorder | Read |
| U202. | [X]Overdose - benzodiazepine                                | Mental and behavioural disorder | Read |
| U202. | [X]Overdose - nitrazepam                                    | Mental and behavioural disorder | Read |
| U204. | [X]Intent self poison/exposure to psychotropic drug         | Mental and behavioural disorder | Read |
| U2084 |                                                             | Mental and behavioural disorder | Read |
| U27z. | [X]Intent self harm by smoke fire/flames occ unspecif place | Mental and behavioural disorder | Read |
| U720. | [X]Sequelae of intentional self-harm                        | Mental and behavioural disorder | Read |
| U202. | [X]Overdose - temazepam                                     | Mental and behavioural disorder | Read |
| ZX18. | Hanging self                                                | Mental and behavioural disorder | Read |
| U202. | [X]Overdose - diazepam                                      | Mental and behavioural disorder | Read |
| U202. | [X]Overdose - sleeping tabs                                 | Mental and behavioural disorder | Read |
| ZX1C. | Nipping self                                                | Mental and                      | Read |

|           |                                                              |                                 |      |
|-----------|--------------------------------------------------------------|---------------------------------|------|
|           |                                                              | behavioural disorder            |      |
| SL90z     | Anti-depressant poisoning NOS                                | Mental and behavioural disorder | Read |
| ZX1LD     | [X]Self mutilation                                           | Mental and behavioural disorder | Read |
| ZX1S.     | Throwing self onto floor                                     | Mental and behavioural disorder | Read |
| U200y     | [X]Int self poison nonopioid analgesic other spec place      | Mental and behavioural disorder | Read |
| TK1y.     | Suicide and selfinflicted poisoning by other utility gas     | Mental and behavioural disorder | Read |
| U210.     | [X]Intent self harm by hanging strangulat/suffocat occ home  | Mental and behavioural disorder | Read |
| TK61.     | Suicide and selfinflicted injury by stabbing                 | Mental and behavioural disorder | Read |
| U20Az     | [X]Int self pois org solv,halogen hydrocarb, unspec place    | Mental and behavioural disorder | Read |
| U204.     | [X]Overdose - antidepressant                                 | Mental and behavioural disorder | Read |
| U204.     | [X]Overdose - amitriptyline                                  | Mental and behavioural disorder | Read |
| U204.     | [X]Overdose - SSRI                                           | Mental and behavioural disorder | Read |
| TK2z.     | Suicide + selfinflicted poisoning by gases and vapours NOS   | Mental and behavioural disorder | Read |
| TKz..     | Suicide and selfinflicted injury NOS                         | Mental and behavioural disorder | Read |
| U202.     | [X]Intent self poison/exposure to sedative hypnotic          | Mental and behavioural disorder | Read |
| TK07.     | Suicide + selfinflicted poisoning by corrosive/caustic subst | Mental and behavioural disorder | Read |
| U28..     | [X]Intentional self harm by steam hot vapours / hot objects  | Mental and behavioural disorder | Read |
| TK30.     | Suicide and selfinflicted injury by hanging                  | Mental and behavioural disorder | Read |
| ZX1H.     | Self-asphyxiation                                            | Mental and behavioural disorder | Read |
| TK72.     | Suicide+selfinflicted injury-jump from natural sites         | Mental and behavioural disorder | Read |
| U201z     | [X]Intent self poison antiepileptic unspecif place           | Mental and behavioural disorder | Read |
| ZX1M.     | Shooting self                                                | Mental and behavioural disorder | Read |
| ZX12.     | Burning self                                                 | Mental and behavioural disorder | Read |
| U204<br>1 |                                                              | Mental and behavioural disorder | Read |
| U206<br>4 |                                                              | Mental and behavioural disorder | Read |
| U2A3.     | [X]Intent self harm by blunt object occ sports/athlet area   | Mental and                      | Read |

|           |                                                              |                                 |      |
|-----------|--------------------------------------------------------------|---------------------------------|------|
|           |                                                              | behavioural disorder            |      |
| TK601     | Slashed wrists self inflicted                                | Mental and behavioural disorder | Read |
| U204z     | [X]Intent self poison psychotropic drug unspecif place       | Mental and behavioural disorder | Read |
| U20B.     | [X]Self carbon monoxide poisoning                            | Mental and behavioural disorder | Read |
| U21..     | [X]Intent self harm by hanging strangulation / suffocation   | Mental and behavioural disorder | Read |
| TK0..     | Suicide + selfinflicted poisoning by solid/liquid substances | Mental and behavioural disorder | Read |
| U20A<br>4 | [X]Int self poison org solvent,halogen hydrocarb,in highway  | Mental and behavioural disorder | Read |
| U2B4.     | [X]Intent self harm by jump from high place occ street/h'way | Mental and behavioural disorder | Read |
| U2zz.     | [X]Intent self harm by unspecif means occ at unspecif place  | Mental and behavioural disorder | Read |
| ZX191     | Punching self                                                | Mental and behavioural disorder | Read |
| TK4..     | Suicide and selfinflicted injury by drowning                 | Mental and behavioural disorder | Read |
| TKx2.     | Suicide and selfinflicted injury by scald                    | Mental and behavioural disorder | Read |
| TK21.     | Suicide and selfinflicted poisoning by other carbon monoxide | Mental and behavioural disorder | Read |
| U41..     | [X]Hanging strangulation + suffocation undetermined intent   | Mental and behavioural disorder | Read |
| U294.     | [X]Intention self harm by sharp object occ street/highway    | Mental and behavioural disorder | Read |
| TK6z.     | Suicide and selfinflicted injury by cutting and stabbing NOS | Mental and behavioural disorder | Read |
| U242.     |                                                              | Mental and behavioural disorder | Read |
| U200<br>0 | [X]Int self poison/exposure to nonopioid analgesic at home   | Mental and behavioural disorder | Read |
| TKxy.     | Suicide and selfinflicted injury by other specified means    | Mental and behavioural disorder | Read |
| U2C..     | [X]Intent self harm by jumping / lying before moving object  | Mental and behavioural disorder | Read |
| ZX1B.     | Jumping from height                                          | Mental and behavioural disorder | Read |
| U209y     | [X]Int self poison alcohol other spec place                  | Mental and behavioural disorder | Read |
| TK70.     | Suicide+selfinflicted injury-jump from residential premises  | Mental and behavioural disorder | Read |
| ZX1R.     | Throwing self in front of vehicle                            | Mental and behavioural disorder | Read |
| TKx3.     | Suicide and selfinflicted injury by extremes of cold         | Mental and behavioural disorder | Read |
| TK20.     | Suicide + selfinflicted poisoning by motor veh exhaust gas   | Mental and                      | Read |

|       |                                                              |                                 |      |
|-------|--------------------------------------------------------------|---------------------------------|------|
|       |                                                              | behavioural disorder            |      |
| U20y. | [X]Intent self poison/exposure to unspecif chemical          | Mental and behavioural disorder | Read |
| U220. | [X]Intent self harm by drowning/submersion occurrn at home   | Mental and behavioural disorder | Read |
| ZX... | Self-harm                                                    | Mental and behavioural disorder | Read |
| U208. | [X]Int self poison/exposure to other/unspec drug/medicament  | Mental and behavioural disorder | Read |
| U20.. | [X]Deliberate drug overdose / other poisoning                | Mental and behavioural disorder | Read |
| U2040 | [X]Int self poison/exposure to psychotropic drug at home     | Mental and behavioural disorder | Read |
| ZX11. | Bites self                                                   | Mental and behavioural disorder | Read |
| ZX1G. | Scratches self                                               | Mental and behavioural disorder | Read |
| ZRn3. | Suicide intent score subscale - attempt circumstances        | Mental and behavioural disorder | Read |
| TK5.. | Suicide and selfinflicted injury by firearms and explosives  | Mental and behavioural disorder | Read |
| TK71. | Suicide+selfinflicted injury-jump from oth manmade structure | Mental and behavioural disorder | Read |
| U204y | [X]Int self poison psychotropic drug other spec place        | Mental and behavioural disorder | Read |
| U20C. | [X]Intent self poison/exposure to pesticide                  | Mental and behavioural disorder | Read |
| U25.. | [X]Intent self harm by other/unspecified firearm discharge   | Mental and behavioural disorder | Read |
| U2B.. | [X]Intentional self harm by jumping from a high place        | Mental and behavioural disorder | Read |
| U2y.. | [X]Intentional self harm by other specified means            | Mental and behavioural disorder | Read |
| U29.. | [X]Intentional self harm by sharp object                     | Mental and behavioural disorder | Read |
| ZX1Q. | Jumping under train                                          | Mental and behavioural disorder | Read |
| ZX192 | Slapping self                                                | Mental and behavioural disorder | Read |
| ZX1L. | Self-mutilation                                              | Mental and behavioural disorder | Read |
| U21z. | [X]Intent self harm by hangng strangul/suffoct unspecif plce | Mental and behavioural disorder | Read |
| TKy.. | Late effects of selfinflicted injury                         | Mental and behavioural disorder | Read |
| U2By. | [X]Int self harm by jump from high place occ oth specif plce | Mental and behavioural disorder | Read |
| U2001 |                                                              | Mental and behavioural disorder | Read |
| U202  |                                                              | Mental and                      | Read |

|       |                                                              |                                 |        |
|-------|--------------------------------------------------------------|---------------------------------|--------|
| 4     |                                                              | behavioural disorder            |        |
| U2C4. | [X]Int self harm jump/lying befr mov obje occ street/highway | Mental and behavioural disorder | Read   |
| ZX1L6 | Self-mutilation of ears                                      | Mental and behavioural disorder | Read   |
| U20.. | [X]Intentional self poisoning/exposure to noxious substances | Mental and behavioural disorder | Read   |
| U29y. | [X]Intention self harm by sharp object occ oth specif place  | Mental and behavioural disorder | Read   |
| ZX11. | Biting self                                                  | Mental and behavioural disorder | Read   |
| ZX131 | Cutting own wrists                                           | Mental and behavioural disorder | Read   |
| TK03. | Suicide + selfinflicted poisoning tranquilliser/psychotropic | Mental and behavioural disorder | Read   |
| U20C. | [X]Self poisoning with paraquat                              | Mental and behavioural disorder | Read   |
| U20C. | [X]Self poisoning with weedkiller                            | Mental and behavioural disorder | Read   |
| U205z | [X]Intent self poison narcotic drug unspecif place           | Mental and behavioural disorder | Read   |
| U2D0. | [X]Intent self harm by crash of motor vehicl occurrn at home | Mental and behavioural disorder | Read   |
| TK1z. | Suicide + selfinflicted poisoning by domestic gases NOS      | Mental and behavioural disorder | Read   |
| R0074 | [D]Postviral (asthenic) syndrome                             | POST VIRAL                      | Read   |
| F286. | Chronic Fatigue Syndrome/Postviral fatigue syndrome          | POST VIRAL                      | Read   |
| A37.  | Whooping cough                                               | Respiratory                     | ICD-10 |
| A370  | Whooping cough due to Bordetella pertussis                   | Respiratory                     | ICD-10 |
| A371  | Whooping cough due to Bordetella parapertussis               | Respiratory                     | ICD-10 |
| A378  | Whooping cough due to other Bordetella species               | Respiratory                     | ICD-10 |
| A379  | Whooping cough, unspecified                                  | Respiratory                     | ICD-10 |
| H66.  | Suppurative and unspecified otitis media                     | Respiratory                     | ICD-10 |
| H660  | Acute suppurative otitis media                               | Respiratory                     | ICD-10 |
| H661  | Chronic tubotympanic suppurative otitis media                | Respiratory                     | ICD-10 |
| H662  | Chronic atticofacial suppurative otitis media                | Respiratory                     | ICD-10 |
| H663  | Other chronic suppurative otitis media                       | Respiratory                     | ICD-10 |
| H664  | Suppurative otitis media, unspecified                        | Respiratory                     | ICD-10 |
| H669  | Otitis media, unspecified                                    | Respiratory                     | ICD-   |

|      |                                                         |             |        |
|------|---------------------------------------------------------|-------------|--------|
|      |                                                         |             | 10     |
| H67. | Otitis media in diseases classified elsewhere           | Respiratory | ICD-10 |
| H670 | Otitis media in bacterial diseases classified elsewhere | Respiratory | ICD-10 |
| H671 | Otitis media in viral diseases classified elsewhere     | Respiratory | ICD-10 |
| H678 | Otitis media in other diseases classified elsewhere     | Respiratory | ICD-10 |
| J00X | Acute nasopharyngitis [common cold]                     | Respiratory | ICD-10 |
| J01. | Acute sinusitis                                         | Respiratory | ICD-10 |
| J010 | Acute maxillary sinusitis                               | Respiratory | ICD-10 |
| J011 | Acute frontal sinusitis                                 | Respiratory | ICD-10 |
| J012 | Acute ethmoidal sinusitis                               | Respiratory | ICD-10 |
| J013 | Acute sphenoidal sinusitis                              | Respiratory | ICD-10 |
| J014 | Acute pansinusitis                                      | Respiratory | ICD-10 |
| J018 | Other acute sinusitis                                   | Respiratory | ICD-10 |
| J019 | Acute sinusitis, unspecified                            | Respiratory | ICD-10 |
| J02. | Acute pharyngitis                                       | Respiratory | ICD-10 |
| J020 | Streptococcal pharyngitis                               | Respiratory | ICD-10 |
| J028 | Acute pharyngitis due to other specified organisms      | Respiratory | ICD-10 |
| J029 | Acute pharyngitis, unspecified                          | Respiratory | ICD-10 |
| J03. | Acute tonsillitis                                       | Respiratory | ICD-10 |
| J030 | Streptococcal tonsillitis                               | Respiratory | ICD-10 |
| J038 | Acute tonsillitis due to other specified organisms      | Respiratory | ICD-10 |
| J039 | Acute tonsillitis, unspecified                          | Respiratory | ICD-10 |
| J04. | Acute laryngitis and tracheitis                         | Respiratory | ICD-10 |
| J040 | Acute laryngitis                                        | Respiratory | ICD-10 |
| J041 | Acute tracheitis                                        | Respiratory | ICD-10 |
| J042 | Acute laryngotracheitis                                 | Respiratory | ICD-   |



|      |                                                                                   |             |        |
|------|-----------------------------------------------------------------------------------|-------------|--------|
|      |                                                                                   |             | 10     |
| J05. | Acute obstructive laryngitis [croup] and epiglottitis                             | Respiratory | ICD-10 |
| J050 | Acute obstructive laryngitis [croup]                                              | Respiratory | ICD-10 |
| J051 | Acute epiglottitis                                                                | Respiratory | ICD-10 |
| J06. | Acute upper respiratory infections of multiple and unspecified sites              | Respiratory | ICD-10 |
| J060 | Acute laryngopharyngitis                                                          | Respiratory | ICD-10 |
| J068 | Other acute upper respiratory infections of multiple sites                        | Respiratory | ICD-10 |
| J069 | Acute upper respiratory infection, unspecified                                    | Respiratory | ICD-10 |
| J09X | Influenza due to identified avian influenza virus                                 | Respiratory | ICD-10 |
| J10. | Influenza due to other identified influenza virus                                 | Respiratory | ICD-10 |
| J100 | Influenza with pneumonia, other influenza virus identified                        | Respiratory | ICD-10 |
| J101 | Influenza with other respiratory manifestations, other influenza virus identified | Respiratory | ICD-10 |
| J108 | Influenza with other manifestations, other influenza virus identified             | Respiratory | ICD-10 |
| J11. | Influenza, virus not identified                                                   | Respiratory | ICD-10 |
| J110 | Influenza with pneumonia, virus not identified                                    | Respiratory | ICD-10 |
| J111 | Influenza with other respiratory manifestations, virus not identified             | Respiratory | ICD-10 |
| J118 | Influenza with other manifestations, virus not identified                         | Respiratory | ICD-10 |
| J12. | Viral pneumonia, not elsewhere classified                                         | Respiratory | ICD-10 |
| J120 | Adenoviral pneumonia                                                              | Respiratory | ICD-10 |
| J121 | Respiratory syncytial virus pneumonia                                             | Respiratory | ICD-10 |
| J122 | Parainfluenza virus pneumonia                                                     | Respiratory | ICD-10 |
| J123 | Human metapneumovirus pneumonia                                                   | Respiratory | ICD-10 |
| J128 | Other viral pneumonia                                                             | Respiratory | ICD-10 |
| J129 | Viral pneumonia, unspecified                                                      | Respiratory | ICD-10 |
| J13X | Pneumonia due to <i>Streptococcus pneumoniae</i>                                  | Respiratory | ICD-10 |
| J14X | Pneumonia due to <i>Haemophilus influenzae</i>                                    | Respiratory | ICD-   |

|      |                                                                       |             |        |
|------|-----------------------------------------------------------------------|-------------|--------|
|      |                                                                       |             | 10     |
| J15. | Bacterial pneumonia, not elsewhere classified                         | Respiratory | ICD-10 |
| J150 | Pneumonia due to Klebsiella pneumoniae                                | Respiratory | ICD-10 |
| J151 | Pneumonia due to Pseudomonas                                          | Respiratory | ICD-10 |
| J152 | Pneumonia due to staphylococcus                                       | Respiratory | ICD-10 |
| J153 | Pneumonia due to streptococcus, group B                               | Respiratory | ICD-10 |
| J154 | Pneumonia due to other streptococci                                   | Respiratory | ICD-10 |
| J155 | Pneumonia due to Escherichia coli                                     | Respiratory | ICD-10 |
| J156 | Pneumonia due to other aerobic Gram-negative bacteria                 | Respiratory | ICD-10 |
| J157 | Pneumonia due to Mycoplasma pneumoniae                                | Respiratory | ICD-10 |
| J158 | Other bacterial pneumonia                                             | Respiratory | ICD-10 |
| J159 | Bacterial pneumonia, unspecified                                      | Respiratory | ICD-10 |
| J16. | Pneumonia due to other infectious organisms, not elsewhere classified | Respiratory | ICD-10 |
| J160 | Chlamydial pneumonia                                                  | Respiratory | ICD-10 |
| J168 | Pneumonia due to other specified infectious organisms                 | Respiratory | ICD-10 |
| J17. | Pneumonia in diseases classified elsewhere                            | Respiratory | ICD-10 |
| J170 | Pneumonia in bacterial diseases classified elsewhere                  | Respiratory | ICD-10 |
| J171 | Pneumonia in viral diseases classified elsewhere                      | Respiratory | ICD-10 |
| J172 | Pneumonia in mycoses                                                  | Respiratory | ICD-10 |
| J173 | Pneumonia in parasitic diseases                                       | Respiratory | ICD-10 |
| J178 | Pneumonia in other diseases classified elsewhere                      | Respiratory | ICD-10 |
| J18. | Pneumonia, organism unspecified                                       | Respiratory | ICD-10 |
| J180 | Bronchopneumonia, unspecified                                         | Respiratory | ICD-10 |
| J181 | Lobar pneumonia, unspecified                                          | Respiratory | ICD-10 |
| J182 | Hypostatic pneumonia, unspecified                                     | Respiratory | ICD-10 |
| J188 | Other pneumonia, organism unspecified                                 | Respiratory | ICD-   |

|      |                                                        |             |        |
|------|--------------------------------------------------------|-------------|--------|
|      |                                                        |             | 10     |
| J189 | Pneumonia, unspecified                                 | Respiratory | ICD-10 |
| J20. | Acute bronchitis                                       | Respiratory | ICD-10 |
| J200 | Acute bronchitis due to Mycoplasma pneumoniae          | Respiratory | ICD-10 |
| J201 | Acute bronchitis due to Haemophilus influenzae         | Respiratory | ICD-10 |
| J202 | Acute bronchitis due to streptococcus                  | Respiratory | ICD-10 |
| J203 | Acute bronchitis due to coxsackievirus                 | Respiratory | ICD-10 |
| J204 | Acute bronchitis due to parainfluenza virus            | Respiratory | ICD-10 |
| J205 | Acute bronchitis due to respiratory syncytial virus    | Respiratory | ICD-10 |
| J206 | Acute bronchitis due to rhinovirus                     | Respiratory | ICD-10 |
| J207 | Acute bronchitis due to echovirus                      | Respiratory | ICD-10 |
| J208 | Acute bronchitis due to other specified organisms      | Respiratory | ICD-10 |
| J209 | Acute bronchitis, unspecified                          | Respiratory | ICD-10 |
| J21. | Acute bronchiolitis                                    | Respiratory | ICD-10 |
| J210 | Acute bronchiolitis due to respiratory syncytial virus | Respiratory | ICD-10 |
| J211 | Acute bronchiolitis due to human metapneumovirus       | Respiratory | ICD-10 |
| J218 | Acute bronchiolitis due to other specified organisms   | Respiratory | ICD-10 |
| J219 | Acute bronchiolitis, unspecified                       | Respiratory | ICD-10 |
| J22X | Unspecified acute lower respiratory infection          | Respiratory | ICD-10 |
| J43. | Emphysema                                              | Respiratory | ICD-10 |
| J430 | MacLeod's syndrome                                     | Respiratory | ICD-10 |
| J431 | Panlobular emphysema                                   | Respiratory | ICD-10 |
| J432 | Centrilobular emphysema                                | Respiratory | ICD-10 |
| J438 | Other emphysema                                        | Respiratory | ICD-10 |
| J439 | Emphysema, unspecified                                 | Respiratory | ICD-10 |
| J44. | Other chronic obstructive pulmonary disease            | Respiratory | ICD-   |

|       |                                                                              |             |        |
|-------|------------------------------------------------------------------------------|-------------|--------|
|       |                                                                              |             | 10     |
| J440  | Chronic obstructive pulmonary disease with acute lower respiratory infection | Respiratory | ICD-10 |
| J441  | Chronic obstructive pulmonary disease with acute exacerbation, unspecified   | Respiratory | ICD-10 |
| J448  | Other specified chronic obstructive pulmonary disease                        | Respiratory | ICD-10 |
| J449  | Chronic obstructive pulmonary disease, unspecified                           | Respiratory | ICD-10 |
| J45.  | Asthma                                                                       | Respiratory | ICD-10 |
| J450  | Predominantly allergic asthma                                                | Respiratory | ICD-10 |
| J451  | Nonallergic asthma                                                           | Respiratory | ICD-10 |
| J458  | Mixed asthma                                                                 | Respiratory | ICD-10 |
| J459  | Asthma, unspecified                                                          | Respiratory | ICD-10 |
| J46X  | Status asthmaticus                                                           | Respiratory | ICD-10 |
| P27.  | Chronic respiratory disease originating in the perinatal period              | Respiratory | ICD-10 |
| P270  | Wilson-Mikity syndrome                                                       | Respiratory | ICD-10 |
| P271  | Bronchopulmonary dysplasia originating in the perinatal period               | Respiratory | ICD-10 |
| P278  | Other chronic respiratory diseases originating in the perinatal period       | Respiratory | ICD-10 |
| P279  | Unspecified chronic respiratory disease originating in the perinatal period  | Respiratory | ICD-10 |
| 1780. | Aspirin induced asthma                                                       | Respiratory | Read   |
| 1781. | Asthma trigger - pollen                                                      | Respiratory | Read   |
| 1782. | Asthma trigger - tobacco smoke                                               | Respiratory | Read   |
| 1783. | Asthma trigger - warm air                                                    | Respiratory | Read   |
| 1784. | Asthma trigger - emotion                                                     | Respiratory | Read   |
| 1785. | Asthma trigger - damp                                                        | Respiratory | Read   |
| 1786. | Asthma trigger - animals                                                     | Respiratory | Read   |
| 1787. | Asthma trigger - seasonal                                                    | Respiratory | Read   |
| 1788. | Asthma trigger - cold air                                                    | Respiratory | Read   |
| 1789. | Asthma trigger - respiratory infection                                       | Respiratory | Read   |
| 663e1 | Asthma severely restricts exercise                                           | Respiratory | Read   |
| 6635. | Increasing exercise wheeze                                                   | Respiratory | Read   |
| 8793. | Asthma control step 0                                                        | Respiratory | Read   |
| 8794. | Asthma control step 1                                                        | Respiratory | Read   |
| 8795. | Asthma control step 2                                                        | Respiratory | Read   |
| 8796. | Asthma control step 3                                                        | Respiratory | Read   |
| 8797. | Asthma control step 4                                                        | Respiratory | Read   |

|           |                                                           |             |      |
|-----------|-----------------------------------------------------------|-------------|------|
| 8798.     | Asthma control step 5                                     | Respiratory | Read |
| 173A.     | Exercise induced asthma                                   | Respiratory | Read |
| 178..     | Asthma trigger                                            | Respiratory | Read |
| 178A.     | Asthma trigger - airborne dust                            | Respiratory | Read |
| 178B.     | Asthma trigger - exercise                                 | Respiratory | Read |
| 1J70.     | Suspected asthma                                          | Respiratory | Read |
| 1O2..     | Asthma confirmed                                          | Respiratory | Read |
| 663..     | Respiratory disease monitoring                            | Respiratory | Read |
| 663d.     | Emergency asthma admission since last appointment         | Respiratory | Read |
| 663e.     | Asthma restricts exercise                                 | Respiratory | Read |
| 663f.     | Asthma never restricts exercise                           | Respiratory | Read |
| 663j.     | Asthma - currently active                                 | Respiratory | Read |
| 663J.     | Airways obstruction reversible                            | Respiratory | Read |
| 663m.     | Asthma accident and emergency attendance since last visit | Respiratory | Read |
| 663n.     | Asthma treatment compliance satisfactory                  | Respiratory | Read |
| 663N.     | Asthma disturbing sleep                                   | Respiratory | Read |
| 663N<br>0 | Asthma causing night waking                               | Respiratory | Read |
| 663N<br>1 | Asthma disturbs sleep weekly                              | Respiratory | Read |
| 663N<br>2 | Asthma disturbs sleep frequently                          | Respiratory | Read |
| 663O.     | Asthma not disturbing sleep                               | Respiratory | Read |
| 663O<br>0 | Asthma never disturbs sleep                               | Respiratory | Read |
| 663p.     | Asthma treatment compliance unsatisfactory                | Respiratory | Read |
| 663P.     | Asthma limiting activities                                | Respiratory | Read |
| 663P0     | Asthma limits activities 1 to 2 times per month           | Respiratory | Read |
| 663P1     | Asthma limits activities 1 to 2 times per week            | Respiratory | Read |
| 663P2     | Asthma limits activities most days                        | Respiratory | Read |
| 663q.     | Asthma daytime symptoms                                   | Respiratory | Read |
| 663Q.     | Asthma not limiting activities                            | Respiratory | Read |
| 663r.     | Asthma causes night symptoms 1 to 2 times per month       | Respiratory | Read |
| 663s.     | Asthma never causes daytime symptoms                      | Respiratory | Read |
| 663t.     | Asthma causes daytime symptoms 1 to 2 times per month     | Respiratory | Read |
| 663u.     | Asthma causes daytime symptoms 1 to 2 times per week      | Respiratory | Read |
| 663U.     | Asthma management plan given                              | Respiratory | Read |
| 663v.     | Asthma causes daytime symptoms most days                  | Respiratory | Read |
| 663V.     | Asthma severity                                           | Respiratory | Read |
| 663V0     | Occasional asthma                                         | Respiratory | Read |
| 663V1     | Mild asthma                                               | Respiratory | Read |
| 663V2     | Moderate asthma                                           | Respiratory | Read |
| 663V3     | Severe asthma                                             | Respiratory | Read |
| 663w.     | Asthma limits walking up hills or stairs                  | Respiratory | Read |

|       |                                                         |             |      |
|-------|---------------------------------------------------------|-------------|------|
| 663W  | Asthma prophylactic medication used                     | Respiratory | Read |
| 663x. | Asthma limits walking on the flat                       | Respiratory | Read |
| 663y. | Number of asthma exacerbations in past year             | Respiratory | Read |
| 66Y9. | Step up change in asthma management plan                | Respiratory | Read |
| 66YC. | Absent from work or school due to asthma                | Respiratory | Read |
| 66YK. | Asthma follow-up                                        | Respiratory | Read |
| 66YP. | Asthma night-time symptoms                              | Respiratory | Read |
| 66Yq. | Asthma causes night time symptoms 1 to 2 times per week | Respiratory | Read |
| 66Yr. | Asthma causes symptoms most nights                      | Respiratory | Read |
| 8H2P. | Emergency admission, asthma                             | Respiratory | Read |
| H3120 | Chronic asthmatic bronchitis                            | Respiratory | Read |
| H33.. | Asthma                                                  | Respiratory | Read |
| H330. | Extrinsic (atopic) asthma                               | Respiratory | Read |
| H3300 | Extrinsic asthma without status asthmaticus             | Respiratory | Read |
| H3301 | Extrinsic asthma with status asthmaticus                | Respiratory | Read |
| H330z | Extrinsic asthma NOS                                    | Respiratory | Read |
| H331. | Intrinsic asthma                                        | Respiratory | Read |
| H3310 | Intrinsic asthma without status asthmaticus             | Respiratory | Read |
| H3311 | Intrinsic asthma with status asthmaticus                | Respiratory | Read |
| H331z | Intrinsic asthma NOS                                    | Respiratory | Read |
| H332. | Mixed asthma                                            | Respiratory | Read |
| H333. | Acute exacerbation of asthma                            | Respiratory | Read |
| H334. | Brittle asthma                                          | Respiratory | Read |
| H335. | Chronic asthma with fixed airflow obstruction           | Respiratory | Read |
| H33z. | Asthma unspecified                                      | Respiratory | Read |
| H33z0 | Status asthmaticus NOS                                  | Respiratory | Read |
| H33z1 | Asthma attack                                           | Respiratory | Read |
| H33z2 | Late-onset asthma                                       | Respiratory | Read |
| H33zz | Asthma NOS                                              | Respiratory | Read |
| H35y7 | Wood asthma                                             | Respiratory | Read |
| H47y0 | Detergent asthma                                        | Respiratory | Read |
| 1737. | Wheezing                                                | Respiratory | Read |
| 2326. | O/E - expiratory wheeze                                 | Respiratory | Read |
| 173B. | Nocturnal cough / wheeze                                | Respiratory | Read |
| 173e. | Viral wheeze                                            | Respiratory | Read |
| 23D2. | O/E - rhonchi present                                   | Respiratory | Read |
| 663a. | Oral steroids used since last appointment               | Respiratory | Read |
| 663b. | Home nebuliser used since last appointment              | Respiratory | Read |
| 663c. | Nebulisation since last appointment                     | Respiratory | Read |

|           |                                                     |             |      |
|-----------|-----------------------------------------------------|-------------|------|
| 663F.     | Oral steroids started                               | Respiratory | Read |
| 663G.     | Oral steroids stopped                               | Respiratory | Read |
| 663g1     | Using inhaled steroids - normal dose                | Respiratory | Read |
| 663g2     | Using inhaled steroids - high dose                  | Respiratory | Read |
| 663g3     | Increases inhaled steroids appropriately            | Respiratory | Read |
| 663g4     | Using inhaled steroids - low dose                   | Respiratory | Read |
| 663I.     | Spacer device in use                                | Respiratory | Read |
| 663L.     | Bronchodilators used more than once daily           | Respiratory | Read |
| 663M.     | Bronchodilators used a maximum of once daily        | Respiratory | Read |
| 663S.     | Peak flow meter at home                             | Respiratory | Read |
| 663T.     | No peak flow meter at home                          | Respiratory | Read |
| 663Y.     | Steroid dose inhaled daily                          | Respiratory | Read |
| 663z.     | Number of times bronchodilator used in one week     | Respiratory | Read |
| 663Z0     | Bronchodilator used infrequently                    | Respiratory | Read |
| 663Z1     | Bronchodilator not used in last month               | Respiratory | Read |
| H312<br>1 | Emphysematous bronchitis                            | Respiratory | Read |
| H32..     | Emphysema                                           | Respiratory | Read |
| H464<br>0 | Chronic emphysema due to chemical fumes             | Respiratory | Read |
| H581.     | Interstitial emphysema                              | Respiratory | Read |
| H5y16     | Bronchospasm                                        | Respiratory | Read |
| R0609     | [D]Wheezing                                         | Respiratory | Read |
| R060E     | [D]Mild wheeze                                      | Respiratory | Read |
| R060F     | [D]Moderate wheeze                                  | Respiratory | Read |
| R060<br>G | [D]Severe wheeze                                    | Respiratory | Read |
| R060<br>H | [D]Very severe wheeze                               | Respiratory | Read |
| 14B3.     | H/O: chr.obstr. airway disease                      | Respiratory | Read |
| 663K.     | Airways obstructn irreversible                      | Respiratory | Read |
| 66YL.     | Chronic obstructive pulmonary disease follow-up     | Respiratory | Read |
| H31..     | Chronic bronchitis                                  | Respiratory | Read |
| H36..     | Mild chronic obstructive pulmonary disease          | Respiratory | Read |
| H37..     | Moderate chronic obstructive pulmonary disease      | Respiratory | Read |
| H38..     | Severe chronic obstructive pulmonary disease        | Respiratory | Read |
| H39..     | Very severe chronic obstructive pulmonary disease   | Respiratory | Read |
| H3A..     | End stage chronic obstructive airways disease       | Respiratory | Read |
| H3y..     | Other specified chronic obstructive airways disease | Respiratory | Read |
| H3z..     | Chronic obstructive airways disease NOS             | Respiratory | Read |
| 1825.     | Pleuritic pain                                      | Respiratory | Read |
| 1827.     | Painful breathing -pleurodynia                      | Respiratory | Read |
| 23D5.     | O/E - pleural friction rub                          | Respiratory | Read |
| 4JU9.     | Respiratory syncytial virus A detected              | Respiratory | Read |
| 4JUA.     | Respiratory syncytial virus B detected              | Respiratory | Read |

|           |                                                              |             |      |
|-----------|--------------------------------------------------------------|-------------|------|
| 4JUB.     | Respiratory syncytial virus untyped strain detected          | Respiratory | Read |
| 4JUK.     | Mycoplasma pneumoniae detected                               | Respiratory | Read |
| A0222     | Salmonella pneumonia                                         | Respiratory | Read |
| A521.     | Varicella pneumonitis                                        | Respiratory | Read |
| A54x4     | Herpes simplex pneumonia                                     | Respiratory | Read |
| A551.     | Postmeasles pneumonia                                        | Respiratory | Read |
| A730.     | Ornithosis with pneumonia                                    | Respiratory | Read |
| A741.     | Epidemic pleurodynia                                         | Respiratory | Read |
| A7850     | Cytomegaloviral pneumonitis                                  | Respiratory | Read |
| A79A.     | Respiratory syncytial virus infection                        | Respiratory | Read |
| A7y02     | Resp syncytial virus as cause of dis class to other chapters | Respiratory | Read |
| AyuK<br>N | [X]Resp syncytial virus/cause/diseases classfd/oth chapters  | Respiratory | Read |
| H06..     | Acute bronchitis and bronchiolitis                           | Respiratory | Read |
| H060.     | Acute bronchitis                                             | Respiratory | Read |
| H060<br>0 | Acute fibrinous bronchitis                                   | Respiratory | Read |
| H060<br>1 | Acute membranous bronchitis                                  | Respiratory | Read |
| H060<br>2 | Acute pseudomembranous bronchitis                            | Respiratory | Read |
| H060<br>3 | Acute purulent bronchitis                                    | Respiratory | Read |
| H060<br>4 | Acute croupous bronchitis                                    | Respiratory | Read |
| H060<br>5 | Acute tracheobronchitis                                      | Respiratory | Read |
| H060<br>6 | Acute pneumococcal bronchitis                                | Respiratory | Read |
| H060<br>7 | Acute streptococcal bronchitis                               | Respiratory | Read |
| H060<br>8 | Acute haemophilus influenzae bronchitis                      | Respiratory | Read |
| H060<br>9 | Acute neisseria catarrhalis bronchitis                       | Respiratory | Read |
| H060<br>A | Acute bronchitis due to mycoplasma pneumoniae                | Respiratory | Read |
| H060<br>B | Acute bronchitis due to coxsackievirus                       | Respiratory | Read |
| H060<br>C | Acute bronchitis due to parainfluenza virus                  | Respiratory | Read |
| H060<br>D | Acute bronchitis due to respiratory syncytial virus          | Respiratory | Read |
| H060<br>E | Acute bronchitis due to rhinovirus                           | Respiratory | Read |
| H060F     | Acute bronchitis due to echovirus                            | Respiratory | Read |
| H060v     | Subacute bronchitis unspecified                              | Respiratory | Read |
| H060      | Acute viral bronchitis unspecified                           | Respiratory | Read |



|       |                                                        |             |      |
|-------|--------------------------------------------------------|-------------|------|
| w     |                                                        |             |      |
| H060x | Acute bacterial bronchitis unspecified                 | Respiratory | Read |
| H060z | Acute bronchitis NOS                                   | Respiratory | Read |
| H061. | Acute bronchiolitis                                    | Respiratory | Read |
| H0610 | Acute capillary bronchiolitis                          | Respiratory | Read |
| H0611 | Acute obliterating bronchiolitis                       | Respiratory | Read |
| H0612 | Acute bronchiolitis with bronchospasm                  | Respiratory | Read |
| H0613 | Acute exudative bronchiolitis                          | Respiratory | Read |
| H0614 | Obliterating fibrous bronchiolitis                     | Respiratory | Read |
| H0615 | Acute bronchiolitis due to respiratory syncytial virus | Respiratory | Read |
| H0616 | Acute bronchiolitis due to other specified organisms   | Respiratory | Read |
| H0617 | Acute bronchiolitis due to human metapneumovirus       | Respiratory | Read |
| H061z | Acute bronchiolitis NOS                                | Respiratory | Read |
| H062. | Acute lower respiratory tract infection                | Respiratory | Read |
| H06z. | Acute bronchitis or bronchiolitis NOS                  | Respiratory | Read |
| H06z1 | Lower resp tract infection                             | Respiratory | Read |
| H07.. | Chest cold                                             | Respiratory | Read |
| H2... | Pneumonia and influenza                                | Respiratory | Read |
| H20.. | Viral pneumonia                                        | Respiratory | Read |
| H200. | Pneumonia due to adenovirus                            | Respiratory | Read |
| H201. | Pneumonia due to respiratory syncytial virus           | Respiratory | Read |
| H202. | Pneumonia due to parainfluenza virus                   | Respiratory | Read |
| H203. | Pneumonia due to human metapneumovirus                 | Respiratory | Read |
| H20y. | Viral pneumonia NEC                                    | Respiratory | Read |
| H20y0 | Severe acute respiratory syndrome                      | Respiratory | Read |
| H20z. | Viral pneumonia NOS                                    | Respiratory | Read |
| H21.. | Lobar (pneumococcal) pneumonia                         | Respiratory | Read |
| H22.. | Other bacterial pneumonia                              | Respiratory | Read |
| H23.. | Pneumonia due to other specified organisms             | Respiratory | Read |
| H231. | Pneumonia due to mycoplasma pneumoniae                 | Respiratory | Read |
| H232. | Pneumonia due to pleuropneumonia like organisms        | Respiratory | Read |
| H233. | Chlamydial pneumonia                                   | Respiratory | Read |
| H23z. | Pneumonia due to specified organism NOS                | Respiratory | Read |
| H24.. | Pneumonia with infectious diseases EC                  | Respiratory | Read |
| H240. | Pneumonia with measles                                 | Respiratory | Read |
| H241. | Pneumonia with cytomegalic inclusion disease           | Respiratory | Read |
| H243. | Pneumonia with whooping cough                          | Respiratory | Read |
| H24y. | Pneumonia with other infectious diseases EC            | Respiratory | Read |

|           |                                                      |             |      |
|-----------|------------------------------------------------------|-------------|------|
| H24y7     | Pneumonia with varicella                             | Respiratory | Read |
| H24yz     | Pneumonia with other infectious diseases EC NOS      | Respiratory | Read |
| H24z.     | Pneumonia with infectious diseases EC NOS            | Respiratory | Read |
| H25..     | Bronchopneumonia due to unspecified organism         | Respiratory | Read |
| H26..     | Pneumonia due to unspecified organism                | Respiratory | Read |
| H260.     | Lobar pneumonia due to unspecified organism          | Respiratory | Read |
| H261.     | Basal pneumonia due to unspecified organism          | Respiratory | Read |
| H263.     | Pneumonitis, unspecified                             | Respiratory | Read |
| H270.     | Influenza with pneumonia                             | Respiratory | Read |
| H270<br>0 | Influenza with bronchopneumonia                      | Respiratory | Read |
| H270<br>1 | Influenza with pneumonia, influenza virus identified | Respiratory | Read |
| H270z     | Influenza with pneumonia NOS                         | Respiratory | Read |
| H28..     | Atypical pneumonia                                   | Respiratory | Read |
| H2y..     | Other specified pneumonia or influenza               | Respiratory | Read |
| H2z..     | Pneumonia or influenza NOS                           | Respiratory | Read |
| H30..     | Bronchitis unspecified                               | Respiratory | Read |
| H300.     | Tracheobronchitis NOS                                | Respiratory | Read |
| H301.     | Laryngotracheobronchitis                             | Respiratory | Read |
| H302.     | Wheezy bronchitis                                    | Respiratory | Read |
| H30z.     | Bronchitis NOS                                       | Respiratory | Read |
| H357.     | Ventilation pneumonitis                              | Respiratory | Read |
| H501<br>0 | Pleural abscess                                      | Respiratory | Read |
| H501<br>2 | Pleural empyema                                      | Respiratory | Read |
| H501<br>4 | Purulent pleurisy                                    | Respiratory | Read |
| H51..     | Pleurisy                                             | Respiratory | Read |
| H510.     | Pleurisy without effusion or active tuberculosis     | Respiratory | Read |
| H510<br>3 | Acute dry pleurisy                                   | Respiratory | Read |
| H510<br>4 | Diaphragmatic pleurisy                               | Respiratory | Read |
| H510<br>5 | Basal pleurisy                                       | Respiratory | Read |
| H510<br>9 | Pneumococcal pleurisy                                | Respiratory | Read |
| H510<br>A | Staphylococcal pleurisy                              | Respiratory | Read |
| H510<br>B | Streptococcal pleurisy                               | Respiratory | Read |
| H510z     | Pleurisy without effusion or active tuberculosis NOS | Respiratory | Read |
| H511.     | Bacterial pleurisy with effusion                     | Respiratory | Read |
| H511<br>0 | Pneumococcal pleurisy with effusion                  | Respiratory | Read |

|           |                                                          |             |      |
|-----------|----------------------------------------------------------|-------------|------|
| H511<br>1 | Staphylococcal pleurisy with effusion                    | Respiratory | Read |
| H511z     | Bacterial pleurisy with effusion NOS                     | Respiratory | Read |
| H51y.     | Other pleural effusion excluding mention of tuberculosis | Respiratory | Read |
| H530<br>3 | Abscess of lung with pneumonia                           | Respiratory | Read |
| H564.     | Bronchiolitis obliterans organising pneumonia            | Respiratory | Read |
| H56y1     | Interstitial pneumonia                                   | Respiratory | Read |
| Hyu08     | [X]Other viral pneumonia                                 | Respiratory | Read |
| Hyu0<br>A | [X]Other bacterial pneumonia                             | Respiratory | Read |
| Hyu0<br>B | [X]Pneumonia due to other specified infectious organisms | Respiratory | Read |
| Hyu0<br>D | [X]Pneumonia in viral diseases classified elsewhere      | Respiratory | Read |
| Hyu0<br>H | [X]Other pneumonia, organism unspecified                 | Respiratory | Read |
| Hyu1.     | [X]Other acute lower respiratory infections              | Respiratory | Read |
| Hyu10     | [X]Acute bronchitis due to other specified organisms     | Respiratory | Read |
| Hyu11     | [X]Acute bronchiolitis due to other specified organisms  | Respiratory | Read |
| R0654     | [D]Pleuritic pain                                        | Respiratory | Read |
| R0655     | [D]Pleurodynia                                           | Respiratory | Read |
| 1656.     | Feverish cold                                            | Respiratory | Read |
| 75311     | Drainage of peritonsillar abscess                        | Respiratory | Read |
| 16L..     | Influenza-like symptoms                                  | Respiratory | Read |
| 1C3..     | Earache symptoms                                         | Respiratory | Read |
| 1C32.     | Unilateral earache                                       | Respiratory | Read |
| 1C33.     | Bilateral earache                                        | Respiratory | Read |
| 1C3Z.     | Earache symptom NOS                                      | Respiratory | Read |
| 1C9..     | Sore throat symptom                                      | Respiratory | Read |
| 1C92.     | Has a sore throat                                        | Respiratory | Read |
| 1C93.     | Persistent sore throat                                   | Respiratory | Read |
| 1C9Z.     | Sore throat symptom NOS                                  | Respiratory | Read |
| 1CB3.     | Throat pain                                              | Respiratory | Read |
| 2D95.     | O/E - tympanic membrane red                              | Respiratory | Read |
| 2DB6.     | O/E - follicular tonsillitis                             | Respiratory | Read |
| 2DB7.     | O/E - exudate on tonsils                                 | Respiratory | Read |
| 2DC1.     | O/E - pharynx hyperaemic                                 | Respiratory | Read |
| 2DC2.     | O/E - granular pharyngitis                               | Respiratory | Read |
| 2DC3.     | Inflamed throat                                          | Respiratory | Read |
| 4J3L.     | Influenza A virus H1N1 subtype detected                  | Respiratory | Read |
| 4JF40     | Throat swab culture positive                             | Respiratory | Read |
| 4JU0.     | Influenza H1 virus detected                              | Respiratory | Read |
| 4JU1.     | Influenza H2 virus detected                              | Respiratory | Read |
| 4JU2.     | Influenza H3 virus detected                              | Respiratory | Read |
| 4JU3.     | Influenza H5 virus detected                              | Respiratory | Read |

|           |                                                         |             |      |
|-----------|---------------------------------------------------------|-------------|------|
| 4JU4.     | Influenza A virus, other or untyped strain detected     | Respiratory | Read |
| 4JU5.     | Influenza B virus detected                              | Respiratory | Read |
| 4JUE.     | Human rhinovirus detected                               | Respiratory | Read |
| 4JUF.     | Human parainfluenza virus detected                      | Respiratory | Read |
| 65VA.     | Notification of whooping cough                          | Respiratory | Read |
| A32..     | Diphtheria                                              | Respiratory | Read |
| A320.     | Faucial diphtheria                                      | Respiratory | Read |
| A321.     | Nasopharyngeal diphtheria                               | Respiratory | Read |
| A322.     | Anterior nasal diphtheria                               | Respiratory | Read |
| A323.     | Laryngeal diphtheria                                    | Respiratory | Read |
| A32yz     | Other specified diphtheria NOS                          | Respiratory | Read |
| A32z.     | Diphtheria NOS                                          | Respiratory | Read |
| A33..     | Whooping cough                                          | Respiratory | Read |
| A330.     | Bordetella pertussis                                    | Respiratory | Read |
| A331.     | Bordetella parapertussis                                | Respiratory | Read |
| A33y.     | Whooping cough - other specified organism               | Respiratory | Read |
| A33y0     | Bordetella bronchiseptica                               | Respiratory | Read |
| A33yz     | Other whooping cough NOS                                | Respiratory | Read |
| A33z.     | Whooping cough NOS                                      | Respiratory | Read |
| A34..     | Streptococcal sore throat and scarlatina                | Respiratory | Read |
| A340.     | Streptococcal sore throat                               | Respiratory | Read |
| A3400     | Streptococcal angina                                    | Respiratory | Read |
| A3401     | Streptococcal laryngitis                                | Respiratory | Read |
| A3402     | Streptococcal pharyngitis                               | Respiratory | Read |
| A3403     | Streptococcal tonsillitis                               | Respiratory | Read |
| A340z     | Streptococcal sore throat NOS                           | Respiratory | Read |
| A341.     | Scarlet fever - scarlatina                              | Respiratory | Read |
| A34z.     | Streptococcal sore throat with scarlatina NOS           | Respiratory | Read |
| A552.     | Postmeasles otitis media                                | Respiratory | Read |
| A793.     | Rhinovirus                                              | Respiratory | Read |
| Ayu38     | [X]Diphtheria, unspecified                              | Respiratory | Read |
| Ayu3<br>A | [X]Whooping cough, unspecified                          | Respiratory | Read |
| F51..     | Nonsuppurative otitis media + eustachian tube disorders | Respiratory | Read |
| F510.     | Acute non suppurative otitis media                      | Respiratory | Read |
| F5100     | Acute otitis media with effusion                        | Respiratory | Read |
| F5101     | Acute serous otitis media                               | Respiratory | Read |
| F5102     | Acute mucoid otitis media                               | Respiratory | Read |
| F5103     | Acute sanguinous otitis media                           | Respiratory | Read |
| F5104     | Acute allergic serous otitis media                      | Respiratory | Read |
| F5106     | Acute allergic sanguinous otitis media                  | Respiratory | Read |
| F510z     | Acute nonsuppurative otitis media NOS                   | Respiratory | Read |
| F514.     | Unspecified nonsuppurative otitis media                 | Respiratory | Read |
| F5141     | Serous otitis media NOS                                 | Respiratory | Read |
| F5142     | Catarrhal otitis media NOS                              | Respiratory | Read |

|       |                                                            |             |      |
|-------|------------------------------------------------------------|-------------|------|
| F5143 | Mucoid otitis media NOS                                    | Respiratory | Read |
| F514z | Nonsuppurative otitis media NOS                            | Respiratory | Read |
| F515. | Eustachian tube salpingitis                                | Respiratory | Read |
| F5150 | Unspecified eustachian tube salpingitis                    | Respiratory | Read |
| F5151 | Acute eustachian tube salpingitis                          | Respiratory | Read |
| F515z | Eustachian tube salpingitis NOS                            | Respiratory | Read |
| F52.. | Suppurative and unspecified otitis media                   | Respiratory | Read |
| F520. | Acute suppurative otitis media                             | Respiratory | Read |
| F5200 | Acute suppurative otitis media tympanic membrane intact    | Respiratory | Read |
| F5201 | Acute suppurative otitis media tympanic membrane ruptured  | Respiratory | Read |
| F5203 | Acute suppurative otitis media due to disease EC           | Respiratory | Read |
| F520z | Acute suppurative otitis media NOS                         | Respiratory | Read |
| F524. | Purulent otitis media NOS                                  | Respiratory | Read |
| F5240 | Bilateral suppurative otitis media                         | Respiratory | Read |
| F525. | Recurrent acute otitis media                               | Respiratory | Read |
| F526. | Acute left otitis media                                    | Respiratory | Read |
| F527. | Acute right otitis media                                   | Respiratory | Read |
| F528. | Acute bilateral otitis media                               | Respiratory | Read |
| F52z. | Otitis media NOS                                           | Respiratory | Read |
| F53.. | Mastoiditis and related conditions                         | Respiratory | Read |
| F530. | Acute mastoiditis                                          | Respiratory | Read |
| F5300 | Acute mastoiditis without complications                    | Respiratory | Read |
| F5301 | Subperiosteal mastoid abscess                              | Respiratory | Read |
| F5302 | Gradenigo's syndrome                                       | Respiratory | Read |
| F5303 | Acute mastoiditis with other complication                  | Respiratory | Read |
| F530z | Acute mastoiditis NOS                                      | Respiratory | Read |
| F540. | Acute myringitis without otitis media                      | Respiratory | Read |
| F5401 | Unspecified acute tympanitis                               | Respiratory | Read |
| F5402 | Bullous myringitis                                         | Respiratory | Read |
| F540z | Acute myringitis NOS                                       | Respiratory | Read |
| F587. | Otalgia                                                    | Respiratory | Read |
| F5870 | Unspecified otalgia                                        | Respiratory | Read |
| F5871 | Otogenic pain                                              | Respiratory | Read |
| F587z | Otalgia NOS                                                | Respiratory | Read |
| FyuP0 | [X]Other acute nonsuppurative otitis media                 | Respiratory | Read |
| FyuP3 | [X]Otitis media in bacterial diseases classified elsewhere | Respiratory | Read |
| FyuP4 | [X]Otitis media in viral diseases classified elsewhere     | Respiratory | Read |
| FyuP5 | [X]Otitis media in other diseases classified elsewhere     | Respiratory | Read |
| FyuP7 | [X]Other mastoiditis and related conditions                | Respiratory | Read |
| H00.. | Acute nasopharyngitis                                      | Respiratory | Read |
| H01.. | Acute sinusitis                                            | Respiratory | Read |
| H010. | Acute maxillary sinusitis                                  | Respiratory | Read |
| H011. | Acute frontal sinusitis                                    | Respiratory | Read |

|           |                                         |             |      |
|-----------|-----------------------------------------|-------------|------|
| H012.     | Acute ethmoidal sinusitis               | Respiratory | Read |
| H013.     | Acute sphenoidal sinusitis              | Respiratory | Read |
| H014.     | Acute rhinosinusitis                    | Respiratory | Read |
| H01y.     | Other acute sinusitis                   | Respiratory | Read |
| H01y0     | Acute pansinusitis                      | Respiratory | Read |
| H01yz     | Other acute sinusitis NOS               | Respiratory | Read |
| H01z.     | Acute sinusitis NOS                     | Respiratory | Read |
| H02..     | Acute pharyngitis                       | Respiratory | Read |
| H020.     | Acute gangrenous pharyngitis            | Respiratory | Read |
| H021.     | Acute phlegmonous pharyngitis           | Respiratory | Read |
| H022.     | Acute ulcerative pharyngitis            | Respiratory | Read |
| H023.     | Acute bacterial pharyngitis             | Respiratory | Read |
| H023<br>0 | Acute pneumococcal pharyngitis          | Respiratory | Read |
| H023<br>1 | Acute staphylococcal pharyngitis        | Respiratory | Read |
| H023z     | Acute bacterial pharyngitis NOS         | Respiratory | Read |
| H024.     | Acute viral pharyngitis                 | Respiratory | Read |
| H02z.     | Acute pharyngitis NOS                   | Respiratory | Read |
| H03..     | Acute tonsillitis                       | Respiratory | Read |
| H030.     | Acute erythematous tonsillitis          | Respiratory | Read |
| H031.     | Acute follicular tonsillitis            | Respiratory | Read |
| H032.     | Acute ulcerative tonsillitis            | Respiratory | Read |
| H033.     | Acute catarrhal tonsillitis             | Respiratory | Read |
| H034.     | Acute gangrenous tonsillitis            | Respiratory | Read |
| H035.     | Acute bacterial tonsillitis             | Respiratory | Read |
| H035<br>0 | Acute pneumococcal tonsillitis          | Respiratory | Read |
| H035<br>1 | Acute staphylococcal tonsillitis        | Respiratory | Read |
| H035z     | Acute bacterial tonsillitis NOS         | Respiratory | Read |
| H036.     | Acute viral tonsillitis                 | Respiratory | Read |
| H037.     | Recurrent acute tonsillitis             | Respiratory | Read |
| H03z.     | Acute tonsillitis NOS                   | Respiratory | Read |
| H04..     | Acute laryngitis and tracheitis         | Respiratory | Read |
| H040.     | Acute laryngitis                        | Respiratory | Read |
| H040<br>0 | Acute oedematous laryngitis             | Respiratory | Read |
| H040<br>1 | Acute ulcerative laryngitis             | Respiratory | Read |
| H040<br>2 | Acute catarrhal laryngitis              | Respiratory | Read |
| H040<br>3 | Acute phlegmonous laryngitis            | Respiratory | Read |
| H040<br>4 | Acute haemophilus influenzae laryngitis | Respiratory | Read |
| H040      | Acute pneumococcal laryngitis           | Respiratory | Read |

|       |                                                      |             |      |
|-------|------------------------------------------------------|-------------|------|
| 5     |                                                      |             |      |
| H0406 | Acute suppurative laryngitis                         | Respiratory | Read |
| H040w | Acute viral laryngitis unspecified                   | Respiratory | Read |
| H040x | Acute bacterial laryngitis unspecified               | Respiratory | Read |
| H040z | Acute laryngitis NOS                                 | Respiratory | Read |
| H042. | Acute laryngotracheitis                              | Respiratory | Read |
| H0420 | Acute laryngotracheitis without obstruction          | Respiratory | Read |
| H0421 | Acute laryngotracheitis with obstruction             | Respiratory | Read |
| H042z | Acute laryngotracheitis NOS                          | Respiratory | Read |
| H043. | Acute epiglottitis (non strep)                       | Respiratory | Read |
| H0430 | Acute epiglottitis without obstruction               | Respiratory | Read |
| H0431 | Acute epiglottitis with obstruction                  | Respiratory | Read |
| H0432 | Acute obstructive laryngitis                         | Respiratory | Read |
| H043z | Acute epiglottitis NOS                               | Respiratory | Read |
| H044. | Croup                                                | Respiratory | Read |
| H04z. | Acute laryngitis and tracheitis NOS                  | Respiratory | Read |
| H05.. | Other acute upper respiratory infections             | Respiratory | Read |
| H050. | Acute laryngopharyngitis                             | Respiratory | Read |
| H051. | Acute upper respiratory tract infection              | Respiratory | Read |
| H052. | Pharyngotracheitis                                   | Respiratory | Read |
| H053. | Tracheopharyngitis                                   | Respiratory | Read |
| H054. | Recurrent upper respiratory tract infection          | Respiratory | Read |
| H055. | Pharyngolaryngitis                                   | Respiratory | Read |
| H05y. | Other upper respiratory infections of multiple sites | Respiratory | Read |
| H05z. | Upper respiratory infection NOS                      | Respiratory | Read |
| H1201 | Chronic catarrhal rhinitis                           | Respiratory | Read |
| H1211 | Atrophic pharyngitis                                 | Respiratory | Read |
| H1212 | Granular pharyngitis                                 | Respiratory | Read |
| H1213 | Hypertrophic pharyngitis                             | Respiratory | Read |
| H130. | Chronic maxillary sinusitis                          | Respiratory | Read |
| H131. | Chronic frontal sinusitis                            | Respiratory | Read |
| H135. | Recurrent sinusitis                                  | Respiratory | Read |
| H13y1 | Pansinusitis                                         | Respiratory | Read |
| H141. | Tonsil and/or adenoid hypertrophy                    | Respiratory | Read |
| H15.. | Peritonsillar abscess - quinsy                       | Respiratory | Read |
| H1y1z | Nasal cavity and sinus disease NOS                   | Respiratory | Read |

|       |                                                              |             |      |
|-------|--------------------------------------------------------------|-------------|------|
| H1y22 | Parapharyngeal abscess                                       | Respiratory | Read |
| H1y23 | Retropharyngeal abscess                                      | Respiratory | Read |
| H1y26 | Pharynx or nasopharynx abscess                               | Respiratory | Read |
| H27.. | Influenza                                                    | Respiratory | Read |
| H2710 | Influenza with laryngitis                                    | Respiratory | Read |
| H2711 | Influenza with pharyngitis                                   | Respiratory | Read |
| H27z. | Influenza NOS                                                | Respiratory | Read |
| H29.. | Avian influenza                                              | Respiratory | Read |
| H2A.. | Influenza due to Influenza A virus subtype H1N1              | Respiratory | Read |
| Hyu0. | [X]Acute upper respiratory infections                        | Respiratory | Read |
| Hyu00 | [X]Other acute sinusitis                                     | Respiratory | Read |
| Hyu01 | [X]Acute pharyngitis due to other specified organisms        | Respiratory | Read |
| Hyu02 | [X]Acute tonsillitis due to other specified organisms        | Respiratory | Read |
| Hyu04 | [X]Flu+oth respiratory manifestations,'flu virus identified  | Respiratory | Read |
| Hyu05 | [X]Influenza+other manifestations,influenza virus identified | Respiratory | Read |
| Hyu06 | [X]Influenza+oth respiratory manifestatns,virus not identifd | Respiratory | Read |
| Hyu07 | [X]Influenza+other manifestations, virus not identified      | Respiratory | Read |
| R041. | [D]Throat pain                                               | Respiratory | Read |
| R1532 | [D]Positive culture findings in throat                       | Respiratory | Read |
| 1780. | Aspirin induced asthma                                       | Respiratory | Read |
| 1781. | Asthma trigger - pollen                                      | Respiratory | Read |
| 1782. | Asthma trigger - tobacco smoke                               | Respiratory | Read |
| 1783. | Asthma trigger - warm air                                    | Respiratory | Read |
| 1784. | Asthma trigger - emotion                                     | Respiratory | Read |
| 1785. | Asthma trigger - damp                                        | Respiratory | Read |
| 1786. | Asthma trigger - animals                                     | Respiratory | Read |
| 1787. | Asthma trigger - seasonal                                    | Respiratory | Read |
| 1788. | Asthma trigger - cold air                                    | Respiratory | Read |
| 1789. | Asthma trigger - respiratory infection                       | Respiratory | Read |
| 663e1 | Asthma severely restricts exercise                           | Respiratory | Read |
| 6635. | Increasing exercise wheeze                                   | Respiratory | Read |
| 8793. | Asthma control step 0                                        | Respiratory | Read |
| 8794. | Asthma control step 1                                        | Respiratory | Read |
| 8795. | Asthma control step 2                                        | Respiratory | Read |
| 8796. | Asthma control step 3                                        | Respiratory | Read |
| 8797. | Asthma control step 4                                        | Respiratory | Read |
| 8798. | Asthma control step 5                                        | Respiratory | Read |
| 173A. | Exercise induced asthma                                      | Respiratory | Read |
| 178.. | Asthma trigger                                               | Respiratory | Read |
| 178A. | Asthma trigger - airborne dust                               | Respiratory | Read |
| 178B. | Asthma trigger - exercise                                    | Respiratory | Read |



|       |                                                           |             |      |
|-------|-----------------------------------------------------------|-------------|------|
| 1J70. | Suspected asthma                                          | Respiratory | Read |
| 1O2.. | Asthma confirmed                                          | Respiratory | Read |
| 663.. | Respiratory disease monitoring                            | Respiratory | Read |
| 663d. | Emergency asthma admission since last appointment         | Respiratory | Read |
| 663e. | Asthma restricts exercise                                 | Respiratory | Read |
| 663f. | Asthma never restricts exercise                           | Respiratory | Read |
| 663j. | Asthma - currently active                                 | Respiratory | Read |
| 663J. | Airways obstruction reversible                            | Respiratory | Read |
| 663m. | Asthma accident and emergency attendance since last visit | Respiratory | Read |
| 663n. | Asthma treatment compliance satisfactory                  | Respiratory | Read |
| 663N. | Asthma disturbing sleep                                   | Respiratory | Read |
| 663N0 | Asthma causing night waking                               | Respiratory | Read |
| 663N1 | Asthma disturbs sleep weekly                              | Respiratory | Read |
| 663N2 | Asthma disturbs sleep frequently                          | Respiratory | Read |
| 663O. | Asthma not disturbing sleep                               | Respiratory | Read |
| 663O0 | Asthma never disturbs sleep                               | Respiratory | Read |
| 663p. | Asthma treatment compliance unsatisfactory                | Respiratory | Read |
| 663P. | Asthma limiting activities                                | Respiratory | Read |
| 663P0 | Asthma limits activities 1 to 2 times per month           | Respiratory | Read |
| 663P1 | Asthma limits activities 1 to 2 times per week            | Respiratory | Read |
| 663P2 | Asthma limits activities most days                        | Respiratory | Read |
| 663q. | Asthma daytime symptoms                                   | Respiratory | Read |
| 663Q. | Asthma not limiting activities                            | Respiratory | Read |
| 663r. | Asthma causes night symptoms 1 to 2 times per month       | Respiratory | Read |
| 663s. | Asthma never causes daytime symptoms                      | Respiratory | Read |
| 663t. | Asthma causes daytime symptoms 1 to 2 times per month     | Respiratory | Read |
| 663u. | Asthma causes daytime symptoms 1 to 2 times per week      | Respiratory | Read |
| 663U. | Asthma management plan given                              | Respiratory | Read |
| 663v. | Asthma causes daytime symptoms most days                  | Respiratory | Read |
| 663V. | Asthma severity                                           | Respiratory | Read |
| 663V0 | Occasional asthma                                         | Respiratory | Read |
| 663V1 | Mild asthma                                               | Respiratory | Read |
| 663V2 | Moderate asthma                                           | Respiratory | Read |
| 663V3 | Severe asthma                                             | Respiratory | Read |
| 663w. | Asthma limits walking up hills or stairs                  | Respiratory | Read |
| 663W  | Asthma prophylactic medication used                       | Respiratory | Read |
| 663x. | Asthma limits walking on the flat                         | Respiratory | Read |
| 663y. | Number of asthma exacerbations in past year               | Respiratory | Read |
| 66Y9. | Step up change in asthma management plan                  | Respiratory | Read |

|       |                                                         |             |      |
|-------|---------------------------------------------------------|-------------|------|
| 66YC. | Absent from work or school due to asthma                | Respiratory | Read |
| 66YK. | Asthma follow-up                                        | Respiratory | Read |
| 66YP. | Asthma night-time symptoms                              | Respiratory | Read |
| 66Yq. | Asthma causes night time symptoms 1 to 2 times per week | Respiratory | Read |
| 66Yr. | Asthma causes symptoms most nights                      | Respiratory | Read |
| 8H2P. | Emergency admission, asthma                             | Respiratory | Read |
| H3120 | Chronic asthmatic bronchitis                            | Respiratory | Read |
| H33.. | Asthma                                                  | Respiratory | Read |
| H330. | Extrinsic (atopic) asthma                               | Respiratory | Read |
| H3300 | Extrinsic asthma without status asthmaticus             | Respiratory | Read |
| H3301 | Extrinsic asthma with status asthmaticus                | Respiratory | Read |
| H330z | Extrinsic asthma NOS                                    | Respiratory | Read |
| H331. | Intrinsic asthma                                        | Respiratory | Read |
| H3310 | Intrinsic asthma without status asthmaticus             | Respiratory | Read |
| H3311 | Intrinsic asthma with status asthmaticus                | Respiratory | Read |
| H331z | Intrinsic asthma NOS                                    | Respiratory | Read |
| H332. | Mixed asthma                                            | Respiratory | Read |
| H333. | Acute exacerbation of asthma                            | Respiratory | Read |
| H334. | Brittle asthma                                          | Respiratory | Read |
| H335. | Chronic asthma with fixed airflow obstruction           | Respiratory | Read |
| H33z. | Asthma unspecified                                      | Respiratory | Read |
| H33z0 | Status asthmaticus NOS                                  | Respiratory | Read |
| H33z1 | Asthma attack                                           | Respiratory | Read |
| H33z2 | Late-onset asthma                                       | Respiratory | Read |
| H33zz | Asthma NOS                                              | Respiratory | Read |
| H35y7 | Wood asthma                                             | Respiratory | Read |
| H47y0 | Detergent asthma                                        | Respiratory | Read |
| 1737. | Wheezing                                                | Respiratory | Read |
| 2326. | O/E - expiratory wheeze                                 | Respiratory | Read |
| 173B. | Nocturnal cough / wheeze                                | Respiratory | Read |
| 173e. | Viral wheeze                                            | Respiratory | Read |
| 23D2. | O/E - rhonchi present                                   | Respiratory | Read |
| 663a. | Oral steroids used since last appointment               | Respiratory | Read |
| 663b. | Home nebuliser used since last appointment              | Respiratory | Read |
| 663c. | Nebulisation since last appointment                     | Respiratory | Read |
| 663F. | Oral steroids started                                   | Respiratory | Read |
| 663G. | Oral steroids stopped                                   | Respiratory | Read |
| 663g1 | Using inhaled steroids - normal dose                    | Respiratory | Read |
| 663g2 | Using inhaled steroids - high dose                      | Respiratory | Read |
| 663g3 | Increases inhaled steroids appropriately                | Respiratory | Read |

|           |                                                         |             |        |
|-----------|---------------------------------------------------------|-------------|--------|
| 663g4     | Using inhaled steroids - low dose                       | Respiratory | Read   |
| 663I.     | Spacer device in use                                    | Respiratory | Read   |
| 663L.     | Bronchodilators used more than once daily               | Respiratory | Read   |
| 663M.     | Bronchodilators used a maximum of once daily            | Respiratory | Read   |
| 663S.     | Peak flow meter at home                                 | Respiratory | Read   |
| 663T.     | No peak flow meter at home                              | Respiratory | Read   |
| 663Y.     | Steroid dose inhaled daily                              | Respiratory | Read   |
| 663z.     | Number of times bronchodilator used in one week         | Respiratory | Read   |
| 663Z0     | Bronchodilator used infrequently                        | Respiratory | Read   |
| 663Z1     | Bronchodilator not used in last month                   | Respiratory | Read   |
| H312<br>1 | Emphysematous bronchitis                                | Respiratory | Read   |
| H32..     | Emphysema                                               | Respiratory | Read   |
| H464<br>0 | Chronic emphysema due to chemical fumes                 | Respiratory | Read   |
| H581.     | Interstitial emphysema                                  | Respiratory | Read   |
| H5y16     | Bronchospasm                                            | Respiratory | Read   |
| R0609     | [D]Wheezing                                             | Respiratory | Read   |
| R060E     | [D]Mild wheeze                                          | Respiratory | Read   |
| R060F     | [D]Moderate wheeze                                      | Respiratory | Read   |
| R060<br>G | [D]Severe wheeze                                        | Respiratory | Read   |
| R060<br>H | [D]Very severe wheeze                                   | Respiratory | Read   |
| H66.      | Suppurative and unspecified otitis media                | Respiratory | ICD-10 |
| H660      | Acute suppurative otitis media                          | Respiratory | ICD-10 |
| H661      | Chronic tubotympanic suppurative otitis media           | Respiratory | ICD-10 |
| H662      | Chronic atticofacial suppurative otitis media           | Respiratory | ICD-10 |
| H663      | Other chronic suppurative otitis media                  | Respiratory | ICD-10 |
| H664      | Suppurative otitis media, unspecified                   | Respiratory | ICD-10 |
| H669      | Otitis media, unspecified                               | Respiratory | ICD-10 |
| H67.      | Otitis media in diseases classified elsewhere           | Respiratory | ICD-10 |
| H670      | Otitis media in bacterial diseases classified elsewhere | Respiratory | ICD-10 |
| H671      | Otitis media in viral diseases classified elsewhere     | Respiratory | ICD-10 |
| H678      | Otitis media in other diseases classified elsewhere     | Respiratory | ICD-10 |
| 14B3.     | H/O: chr.obstr. airway disease                          | Respiratory | Read   |
| 663K.     | Airways obstructn irreversible                          | Respiratory | Read   |

|       |                                                     |             |        |
|-------|-----------------------------------------------------|-------------|--------|
| 66YL. | Chronic obstructive pulmonary disease follow-up     | Respiratory | Read   |
| H31.. | Chronic bronchitis                                  | Respiratory | Read   |
| H36.. | Mild chronic obstructive pulmonary disease          | Respiratory | Read   |
| H37.. | Moderate chronic obstructive pulmonary disease      | Respiratory | Read   |
| H38.. | Severe chronic obstructive pulmonary disease        | Respiratory | Read   |
| H39.. | Very severe chronic obstructive pulmonary disease   | Respiratory | Read   |
| H3A.. | End stage chronic obstructive airways disease       | Respiratory | Read   |
| H3y.. | Other specified chronic obstructive airways disease | Respiratory | Read   |
| H3z.. | Chronic obstructive airways disease NOS             | Respiratory | Read   |
| J00X  | Acute nasopharyngitis [common cold]                 | Respiratory | ICD-10 |
| J01.  | Acute sinusitis                                     | Respiratory | ICD-10 |
| J010  | Acute maxillary sinusitis                           | Respiratory | ICD-10 |
| J011  | Acute frontal sinusitis                             | Respiratory | ICD-10 |
| J012  | Acute ethmoidal sinusitis                           | Respiratory | ICD-10 |
| J013  | Acute sphenoidal sinusitis                          | Respiratory | ICD-10 |
| J014  | Acute pansinusitis                                  | Respiratory | ICD-10 |
| J018  | Other acute sinusitis                               | Respiratory | ICD-10 |
| J019  | Acute sinusitis, unspecified                        | Respiratory | ICD-10 |
| J02.  | Acute pharyngitis                                   | Respiratory | ICD-10 |
| J020  | Streptococcal pharyngitis                           | Respiratory | ICD-10 |
| J028  | Acute pharyngitis due to other specified organisms  | Respiratory | ICD-10 |
| J029  | Acute pharyngitis, unspecified                      | Respiratory | ICD-10 |
| J03.  | Acute tonsillitis                                   | Respiratory | ICD-10 |
| J030  | Streptococcal tonsillitis                           | Respiratory | ICD-10 |
| J038  | Acute tonsillitis due to other specified organisms  | Respiratory | ICD-10 |
| J039  | Acute tonsillitis, unspecified                      | Respiratory | ICD-10 |
| J04.  | Acute laryngitis and tracheitis                     | Respiratory | ICD-10 |
| J040  | Acute laryngitis                                    | Respiratory | ICD-10 |
| J041  | Acute tracheitis                                    | Respiratory | ICD-10 |

|      |                                                                                   |             |        |
|------|-----------------------------------------------------------------------------------|-------------|--------|
| J042 | Acute laryngotracheitis                                                           | Respiratory | ICD-10 |
| J05. | Acute obstructive laryngitis [croup] and epiglottitis                             | Respiratory | ICD-10 |
| J050 | Acute obstructive laryngitis [croup]                                              | Respiratory | ICD-10 |
| J051 | Acute epiglottitis                                                                | Respiratory | ICD-10 |
| J06. | Acute upper respiratory infections of multiple and unspecified sites              | Respiratory | ICD-10 |
| J060 | Acute laryngopharyngitis                                                          | Respiratory | ICD-10 |
| J068 | Other acute upper respiratory infections of multiple sites                        | Respiratory | ICD-10 |
| J069 | Acute upper respiratory infection, unspecified                                    | Respiratory | ICD-10 |
| J09X | Influenza due to identified avian influenza virus                                 | Respiratory | ICD-10 |
| J10. | Influenza due to other identified influenza virus                                 | Respiratory | ICD-10 |
| J100 | Influenza with pneumonia, other influenza virus identified                        | Respiratory | ICD-10 |
| J101 | Influenza with other respiratory manifestations, other influenza virus identified | Respiratory | ICD-10 |
| J108 | Influenza with other manifestations, other influenza virus identified             | Respiratory | ICD-10 |
| J11. | Influenza, virus not identified                                                   | Respiratory | ICD-10 |
| J110 | Influenza with pneumonia, virus not identified                                    | Respiratory | ICD-10 |
| J111 | Influenza with other respiratory manifestations, virus not identified             | Respiratory | ICD-10 |
| J118 | Influenza with other manifestations, virus not identified                         | Respiratory | ICD-10 |
| J12. | Viral pneumonia, not elsewhere classified                                         | Respiratory | ICD-10 |
| J120 | Adenoviral pneumonia                                                              | Respiratory | ICD-10 |
| J121 | Respiratory syncytial virus pneumonia                                             | Respiratory | ICD-10 |
| J122 | Parainfluenza virus pneumonia                                                     | Respiratory | ICD-10 |
| J123 | Human metapneumovirus pneumonia                                                   | Respiratory | ICD-10 |
| J128 | Other viral pneumonia                                                             | Respiratory | ICD-10 |
| J129 | Viral pneumonia, unspecified                                                      | Respiratory | ICD-10 |
| J13X | Pneumonia due to Streptococcus pneumoniae                                         | Respiratory | ICD-10 |

|      |                                                                       |             |        |
|------|-----------------------------------------------------------------------|-------------|--------|
| J14X | Pneumonia due to Haemophilus influenzae                               | Respiratory | ICD-10 |
| J15. | Bacterial pneumonia, not elsewhere classified                         | Respiratory | ICD-10 |
| J150 | Pneumonia due to Klebsiella pneumoniae                                | Respiratory | ICD-10 |
| J151 | Pneumonia due to Pseudomonas                                          | Respiratory | ICD-10 |
| J152 | Pneumonia due to staphylococcus                                       | Respiratory | ICD-10 |
| J153 | Pneumonia due to streptococcus, group B                               | Respiratory | ICD-10 |
| J154 | Pneumonia due to other streptococci                                   | Respiratory | ICD-10 |
| J155 | Pneumonia due to Escherichia coli                                     | Respiratory | ICD-10 |
| J156 | Pneumonia due to other aerobic Gram-negative bacteria                 | Respiratory | ICD-10 |
| J157 | Pneumonia due to Mycoplasma pneumoniae                                | Respiratory | ICD-10 |
| J158 | Other bacterial pneumonia                                             | Respiratory | ICD-10 |
| J159 | Bacterial pneumonia, unspecified                                      | Respiratory | ICD-10 |
| J16. | Pneumonia due to other infectious organisms, not elsewhere classified | Respiratory | ICD-10 |
| J160 | Chlamydial pneumonia                                                  | Respiratory | ICD-10 |
| J168 | Pneumonia due to other specified infectious organisms                 | Respiratory | ICD-10 |
| J17. | Pneumonia in diseases classified elsewhere                            | Respiratory | ICD-10 |
| J170 | Pneumonia in bacterial diseases classified elsewhere                  | Respiratory | ICD-10 |
| J171 | Pneumonia in viral diseases classified elsewhere                      | Respiratory | ICD-10 |
| J172 | Pneumonia in mycoses                                                  | Respiratory | ICD-10 |
| J173 | Pneumonia in parasitic diseases                                       | Respiratory | ICD-10 |
| J178 | Pneumonia in other diseases classified elsewhere                      | Respiratory | ICD-10 |
| J18. | Pneumonia, organism unspecified                                       | Respiratory | ICD-10 |
| J180 | Bronchopneumonia, unspecified                                         | Respiratory | ICD-10 |
| J181 | Lobar pneumonia, unspecified                                          | Respiratory | ICD-10 |
| J182 | Hypostatic pneumonia, unspecified                                     | Respiratory | ICD-10 |

|           |                                                              |             |        |
|-----------|--------------------------------------------------------------|-------------|--------|
| J188      | Other pneumonia, organism unspecified                        | Respiratory | ICD-10 |
| J189      | Pneumonia, unspecified                                       | Respiratory | ICD-10 |
| 1825.     | Pleuritic pain                                               | Respiratory | Read   |
| 1827.     | Painful breathing -pleurodynia                               | Respiratory | Read   |
| 23D5.     | O/E - pleural friction rub                                   | Respiratory | Read   |
| 4JU9.     | Respiratory syncytial virus A detected                       | Respiratory | Read   |
| 4JUA.     | Respiratory syncytial virus B detected                       | Respiratory | Read   |
| 4JUB.     | Respiratory syncytial virus untyped strain detected          | Respiratory | Read   |
| 4JUK.     | Mycoplasma pneumoniae detected                               | Respiratory | Read   |
| A0222     | Salmonella pneumonia                                         | Respiratory | Read   |
| A521.     | Varicella pneumonitis                                        | Respiratory | Read   |
| A54x4     | Herpes simplex pneumonia                                     | Respiratory | Read   |
| A551.     | Postmeasles pneumonia                                        | Respiratory | Read   |
| A730.     | Ornithosis with pneumonia                                    | Respiratory | Read   |
| A741.     | Epidemic pleurodynia                                         | Respiratory | Read   |
| A7850     | Cytomegaloviral pneumonitis                                  | Respiratory | Read   |
| A79A.     | Respiratory syncytial virus infection                        | Respiratory | Read   |
| A7y02     | Resp syncytial virus as cause of dis class to other chapters | Respiratory | Read   |
| AyuK<br>N | [X]Resp syncytial virus/cause/diseases classfd/oth chapters  | Respiratory | Read   |
| H06..     | Acute bronchitis and bronchiolitis                           | Respiratory | Read   |
| H060.     | Acute bronchitis                                             | Respiratory | Read   |
| H060<br>0 | Acute fibrinous bronchitis                                   | Respiratory | Read   |
| H060<br>1 | Acute membranous bronchitis                                  | Respiratory | Read   |
| H060<br>2 | Acute pseudomembranous bronchitis                            | Respiratory | Read   |
| H060<br>3 | Acute purulent bronchitis                                    | Respiratory | Read   |
| H060<br>4 | Acute croupous bronchitis                                    | Respiratory | Read   |
| H060<br>5 | Acute tracheobronchitis                                      | Respiratory | Read   |
| H060<br>6 | Acute pneumococcal bronchitis                                | Respiratory | Read   |
| H060<br>7 | Acute streptococcal bronchitis                               | Respiratory | Read   |
| H060<br>8 | Acute haemophilus influenzae bronchitis                      | Respiratory | Read   |
| H060<br>9 | Acute neisseria catarrhalis bronchitis                       | Respiratory | Read   |
| H060<br>A | Acute bronchitis due to mycoplasma pneumoniae                | Respiratory | Read   |
| H060<br>B | Acute bronchitis due to coxsackievirus                       | Respiratory | Read   |

|       |                                                        |             |      |
|-------|--------------------------------------------------------|-------------|------|
| H060C | Acute bronchitis due to parainfluenza virus            | Respiratory | Read |
| H060D | Acute bronchitis due to respiratory syncytial virus    | Respiratory | Read |
| H060E | Acute bronchitis due to rhinovirus                     | Respiratory | Read |
| H060F | Acute bronchitis due to echovirus                      | Respiratory | Read |
| H060v | Subacute bronchitis unspecified                        | Respiratory | Read |
| H060w | Acute viral bronchitis unspecified                     | Respiratory | Read |
| H060x | Acute bacterial bronchitis unspecified                 | Respiratory | Read |
| H060z | Acute bronchitis NOS                                   | Respiratory | Read |
| H061. | Acute bronchiolitis                                    | Respiratory | Read |
| H0610 | Acute capillary bronchiolitis                          | Respiratory | Read |
| H0611 | Acute obliterating bronchiolitis                       | Respiratory | Read |
| H0612 | Acute bronchiolitis with bronchospasm                  | Respiratory | Read |
| H0613 | Acute exudative bronchiolitis                          | Respiratory | Read |
| H0614 | Obliterating fibrous bronchiolitis                     | Respiratory | Read |
| H0615 | Acute bronchiolitis due to respiratory syncytial virus | Respiratory | Read |
| H0616 | Acute bronchiolitis due to other specified organisms   | Respiratory | Read |
| H0617 | Acute bronchiolitis due to human metapneumovirus       | Respiratory | Read |
| H061z | Acute bronchiolitis NOS                                | Respiratory | Read |
| H062. | Acute lower respiratory tract infection                | Respiratory | Read |
| H06z. | Acute bronchitis or bronchiolitis NOS                  | Respiratory | Read |
| H06z1 | Lower resp tract infection                             | Respiratory | Read |
| H07.. | Chest cold                                             | Respiratory | Read |
| H2... | Pneumonia and influenza                                | Respiratory | Read |
| H20.. | Viral pneumonia                                        | Respiratory | Read |
| H200. | Pneumonia due to adenovirus                            | Respiratory | Read |
| H201. | Pneumonia due to respiratory syncytial virus           | Respiratory | Read |
| H202. | Pneumonia due to parainfluenza virus                   | Respiratory | Read |
| H203. | Pneumonia due to human metapneumovirus                 | Respiratory | Read |
| H20y. | Viral pneumonia NEC                                    | Respiratory | Read |
| H20y0 | Severe acute respiratory syndrome                      | Respiratory | Read |
| H20z. | Viral pneumonia NOS                                    | Respiratory | Read |
| H21.. | Lobar (pneumococcal) pneumonia                         | Respiratory | Read |
| H22.. | Other bacterial pneumonia                              | Respiratory | Read |
| H23.. | Pneumonia due to other specified organisms             | Respiratory | Read |
| H231. | Pneumonia due to mycoplasma pneumoniae                 | Respiratory | Read |



|           |                                                      |             |      |
|-----------|------------------------------------------------------|-------------|------|
| H232.     | Pneumonia due to pleuropneumonia like organisms      | Respiratory | Read |
| H233.     | Chlamydial pneumonia                                 | Respiratory | Read |
| H23z.     | Pneumonia due to specified organism NOS              | Respiratory | Read |
| H24..     | Pneumonia with infectious diseases EC                | Respiratory | Read |
| H240.     | Pneumonia with measles                               | Respiratory | Read |
| H241.     | Pneumonia with cytomegalic inclusion disease         | Respiratory | Read |
| H243.     | Pneumonia with whooping cough                        | Respiratory | Read |
| H24y.     | Pneumonia with other infectious diseases EC          | Respiratory | Read |
| H24y7     | Pneumonia with varicella                             | Respiratory | Read |
| H24yz     | Pneumonia with other infectious diseases EC NOS      | Respiratory | Read |
| H24z.     | Pneumonia with infectious diseases EC NOS            | Respiratory | Read |
| H25..     | Bronchopneumonia due to unspecified organism         | Respiratory | Read |
| H26..     | Pneumonia due to unspecified organism                | Respiratory | Read |
| H260.     | Lobar pneumonia due to unspecified organism          | Respiratory | Read |
| H261.     | Basal pneumonia due to unspecified organism          | Respiratory | Read |
| H263.     | Pneumonitis, unspecified                             | Respiratory | Read |
| H270.     | Influenza with pneumonia                             | Respiratory | Read |
| H270<br>0 | Influenza with bronchopneumonia                      | Respiratory | Read |
| H270<br>1 | Influenza with pneumonia, influenza virus identified | Respiratory | Read |
| H270z     | Influenza with pneumonia NOS                         | Respiratory | Read |
| H28..     | Atypical pneumonia                                   | Respiratory | Read |
| H2y..     | Other specified pneumonia or influenza               | Respiratory | Read |
| H2z..     | Pneumonia or influenza NOS                           | Respiratory | Read |
| H30..     | Bronchitis unspecified                               | Respiratory | Read |
| H300.     | Tracheobronchitis NOS                                | Respiratory | Read |
| H301.     | Laryngotracheobronchitis                             | Respiratory | Read |
| H302.     | Wheezy bronchitis                                    | Respiratory | Read |
| H30z.     | Bronchitis NOS                                       | Respiratory | Read |
| H357.     | Ventilation pneumonitis                              | Respiratory | Read |
| H501<br>0 | Pleural abscess                                      | Respiratory | Read |
| H501<br>2 | Pleural empyema                                      | Respiratory | Read |
| H501<br>4 | Purulent pleurisy                                    | Respiratory | Read |
| H51..     | Pleurisy                                             | Respiratory | Read |
| H510.     | Pleurisy without effusion or active tuberculosis     | Respiratory | Read |
| H510<br>3 | Acute dry pleurisy                                   | Respiratory | Read |
| H510<br>4 | Diaphragmatic pleurisy                               | Respiratory | Read |
| H510<br>5 | Basal pleurisy                                       | Respiratory | Read |
| H510<br>9 | Pneumococcal pleurisy                                | Respiratory | Read |

|           |                                                          |             |        |
|-----------|----------------------------------------------------------|-------------|--------|
| H510<br>A | Staphylococcal pleurisy                                  | Respiratory | Read   |
| H510<br>B | Streptococcal pleurisy                                   | Respiratory | Read   |
| H510z     | Pleurisy without effusion or active tuberculosis NOS     | Respiratory | Read   |
| H511.     | Bacterial pleurisy with effusion                         | Respiratory | Read   |
| H511<br>0 | Pneumococcal pleurisy with effusion                      | Respiratory | Read   |
| H511<br>1 | Staphylococcal pleurisy with effusion                    | Respiratory | Read   |
| H511z     | Bacterial pleurisy with effusion NOS                     | Respiratory | Read   |
| H51y.     | Other pleural effusion excluding mention of tuberculosis | Respiratory | Read   |
| H530<br>3 | Abscess of lung with pneumonia                           | Respiratory | Read   |
| H564.     | Bronchiolitis obliterans organising pneumonia            | Respiratory | Read   |
| H56y1     | Interstitial pneumonia                                   | Respiratory | Read   |
| Hyu08     | [X]Other viral pneumonia                                 | Respiratory | Read   |
| Hyu0<br>A | [X]Other bacterial pneumonia                             | Respiratory | Read   |
| Hyu0<br>B | [X]Pneumonia due to other specified infectious organisms | Respiratory | Read   |
| Hyu0<br>D | [X]Pneumonia in viral diseases classified elsewhere      | Respiratory | Read   |
| Hyu0<br>H | [X]Other pneumonia, organism unspecified                 | Respiratory | Read   |
| Hyu1.     | [X]Other acute lower respiratory infections              | Respiratory | Read   |
| Hyu10     | [X]Acute bronchitis due to other specified organisms     | Respiratory | Read   |
| Hyu11     | [X]Acute bronchiolitis due to other specified organisms  | Respiratory | Read   |
| R0654     | [D]Pleuritic pain                                        | Respiratory | Read   |
| R0655     | [D]Pleurodynia                                           | Respiratory | Read   |
| J20.      | Acute bronchitis                                         | Respiratory | ICD-10 |
| J200      | Acute bronchitis due to Mycoplasma pneumoniae            | Respiratory | ICD-10 |
| J201      | Acute bronchitis due to Haemophilus influenzae           | Respiratory | ICD-10 |
| J202      | Acute bronchitis due to streptococcus                    | Respiratory | ICD-10 |
| J203      | Acute bronchitis due to coxsackievirus                   | Respiratory | ICD-10 |
| J204      | Acute bronchitis due to parainfluenza virus              | Respiratory | ICD-10 |
| J205      | Acute bronchitis due to respiratory syncytial virus      | Respiratory | ICD-10 |
| J206      | Acute bronchitis due to rhinovirus                       | Respiratory | ICD-10 |
| J207      | Acute bronchitis due to echovirus                        | Respiratory | ICD-10 |
| J208      | Acute bronchitis due to other specified organisms        | Respiratory | ICD-   |

|       |                                                        |             |        |
|-------|--------------------------------------------------------|-------------|--------|
|       |                                                        |             | 10     |
| J209  | Acute bronchitis, unspecified                          | Respiratory | ICD-10 |
| J21.  | Acute bronchiolitis                                    | Respiratory | ICD-10 |
| J210  | Acute bronchiolitis due to respiratory syncytial virus | Respiratory | ICD-10 |
| J211  | Acute bronchiolitis due to human metapneumovirus       | Respiratory | ICD-10 |
| J218  | Acute bronchiolitis due to other specified organisms   | Respiratory | ICD-10 |
| J219  | Acute bronchiolitis, unspecified                       | Respiratory | ICD-10 |
| J22X  | Unspecified acute lower respiratory infection          | Respiratory | ICD-10 |
| 1656. | Feverish cold                                          | Respiratory | Read   |
| 75311 | Drainage of peritonsillar abscess                      | Respiratory | Read   |
| 16L.. | Influenza-like symptoms                                | Respiratory | Read   |
| 1C3.. | Earache symptoms                                       | Respiratory | Read   |
| 1C32. | Unilateral earache                                     | Respiratory | Read   |
| 1C33. | Bilateral earache                                      | Respiratory | Read   |
| 1C3Z. | Earache symptom NOS                                    | Respiratory | Read   |
| 1C9.. | Sore throat symptom                                    | Respiratory | Read   |
| 1C92. | Has a sore throat                                      | Respiratory | Read   |
| 1C93. | Persistent sore throat                                 | Respiratory | Read   |
| 1C9Z. | Sore throat symptom NOS                                | Respiratory | Read   |
| 1CB3. | Throat pain                                            | Respiratory | Read   |
| 2D95. | O/E - tympanic membrane red                            | Respiratory | Read   |
| 2DB6. | O/E - follicular tonsillitis                           | Respiratory | Read   |
| 2DB7. | O/E - exudate on tonsils                               | Respiratory | Read   |
| 2DC1. | O/E - pharynx hyperaemic                               | Respiratory | Read   |
| 2DC2. | O/E - granular pharyngitis                             | Respiratory | Read   |
| 2DC3. | Inflamed throat                                        | Respiratory | Read   |
| 4J3L. | Influenza A virus H1N1 subtype detected                | Respiratory | Read   |
| 4JF40 | Throat swab culture positive                           | Respiratory | Read   |
| 4JU0. | Influenza H1 virus detected                            | Respiratory | Read   |
| 4JU1. | Influenza H2 virus detected                            | Respiratory | Read   |
| 4JU2. | Influenza H3 virus detected                            | Respiratory | Read   |
| 4JU3. | Influenza H5 virus detected                            | Respiratory | Read   |
| 4JU4. | Influenza A virus, other or untyped strain detected    | Respiratory | Read   |
| 4JU5. | Influenza B virus detected                             | Respiratory | Read   |
| 4JUE. | Human rhinovirus detected                              | Respiratory | Read   |
| 4JUF. | Human parainfluenza virus detected                     | Respiratory | Read   |
| 65VA. | Notification of whooping cough                         | Respiratory | Read   |
| A32.. | Diphtheria                                             | Respiratory | Read   |
| A320. | Faucial diphtheria                                     | Respiratory | Read   |

|           |                                                         |             |      |
|-----------|---------------------------------------------------------|-------------|------|
| A321.     | Nasopharyngeal diphtheria                               | Respiratory | Read |
| A322.     | Anterior nasal diphtheria                               | Respiratory | Read |
| A323.     | Laryngeal diphtheria                                    | Respiratory | Read |
| A32yz     | Other specified diphtheria NOS                          | Respiratory | Read |
| A32z.     | Diphtheria NOS                                          | Respiratory | Read |
| A33..     | Whooping cough                                          | Respiratory | Read |
| A330.     | Bordetella pertussis                                    | Respiratory | Read |
| A331.     | Bordetella parapertussis                                | Respiratory | Read |
| A33y.     | Whooping cough - other specified organism               | Respiratory | Read |
| A33y0     | Bordetella bronchiseptica                               | Respiratory | Read |
| A33yz     | Other whooping cough NOS                                | Respiratory | Read |
| A33z.     | Whooping cough NOS                                      | Respiratory | Read |
| A34..     | Streptococcal sore throat and scarlatina                | Respiratory | Read |
| A340.     | Streptococcal sore throat                               | Respiratory | Read |
| A3400     | Streptococcal angina                                    | Respiratory | Read |
| A3401     | Streptococcal laryngitis                                | Respiratory | Read |
| A3402     | Streptococcal pharyngitis                               | Respiratory | Read |
| A3403     | Streptococcal tonsillitis                               | Respiratory | Read |
| A340z     | Streptococcal sore throat NOS                           | Respiratory | Read |
| A341.     | Scarlet fever - scarlatina                              | Respiratory | Read |
| A34z.     | Streptococcal sore throat with scarlatina NOS           | Respiratory | Read |
| A552.     | Postmeasles otitis media                                | Respiratory | Read |
| A793.     | Rhinovirus                                              | Respiratory | Read |
| Ayu38     | [X]Diphtheria, unspecified                              | Respiratory | Read |
| Ayu3<br>A | [X]Whooping cough, unspecified                          | Respiratory | Read |
| F51..     | Nonsuppurative otitis media + eustachian tube disorders | Respiratory | Read |
| F510.     | Acute non suppurative otitis media                      | Respiratory | Read |
| F5100     | Acute otitis media with effusion                        | Respiratory | Read |
| F5101     | Acute serous otitis media                               | Respiratory | Read |
| F5102     | Acute mucoid otitis media                               | Respiratory | Read |
| F5103     | Acute sanguinous otitis media                           | Respiratory | Read |
| F5104     | Acute allergic serous otitis media                      | Respiratory | Read |
| F5106     | Acute allergic sanguinous otitis media                  | Respiratory | Read |
| F510z     | Acute nonsuppurative otitis media NOS                   | Respiratory | Read |
| F514.     | Unspecified nonsuppurative otitis media                 | Respiratory | Read |
| F5141     | Serous otitis media NOS                                 | Respiratory | Read |
| F5142     | Catarrhal otitis media NOS                              | Respiratory | Read |
| F5143     | Mucoid otitis media NOS                                 | Respiratory | Read |
| F514z     | Nonsuppurative otitis media NOS                         | Respiratory | Read |
| F515.     | Eustachian tube salpingitis                             | Respiratory | Read |
| F5150     | Unspecified eustachian tube salpingitis                 | Respiratory | Read |
| F5151     | Acute eustachian tube salpingitis                       | Respiratory | Read |
| F515z     | Eustachian tube salpingitis NOS                         | Respiratory | Read |
| F52..     | Suppurative and unspecified otitis media                | Respiratory | Read |

|       |                                                            |             |      |
|-------|------------------------------------------------------------|-------------|------|
| F520. | Acute suppurative otitis media                             | Respiratory | Read |
| F5200 | Acute suppurative otitis media tympanic membrane intact    | Respiratory | Read |
| F5201 | Acute suppurative otitis media tympanic membrane ruptured  | Respiratory | Read |
| F5203 | Acute suppurative otitis media due to disease EC           | Respiratory | Read |
| F520z | Acute suppurative otitis media NOS                         | Respiratory | Read |
| F524. | Purulent otitis media NOS                                  | Respiratory | Read |
| F5240 | Bilateral suppurative otitis media                         | Respiratory | Read |
| F525. | Recurrent acute otitis media                               | Respiratory | Read |
| F526. | Acute left otitis media                                    | Respiratory | Read |
| F527. | Acute right otitis media                                   | Respiratory | Read |
| F528. | Acute bilateral otitis media                               | Respiratory | Read |
| F52z. | Otitis media NOS                                           | Respiratory | Read |
| F53.. | Mastoiditis and related conditions                         | Respiratory | Read |
| F530. | Acute mastoiditis                                          | Respiratory | Read |
| F5300 | Acute mastoiditis without complications                    | Respiratory | Read |
| F5301 | Subperiosteal mastoid abscess                              | Respiratory | Read |
| F5302 | Gradenigo's syndrome                                       | Respiratory | Read |
| F5303 | Acute mastoiditis with other complication                  | Respiratory | Read |
| F530z | Acute mastoiditis NOS                                      | Respiratory | Read |
| F540. | Acute myringitis without otitis media                      | Respiratory | Read |
| F5401 | Unspecified acute tympanitis                               | Respiratory | Read |
| F5402 | Bullous myringitis                                         | Respiratory | Read |
| F540z | Acute myringitis NOS                                       | Respiratory | Read |
| F587. | Otalgia                                                    | Respiratory | Read |
| F5870 | Unspecified otalgia                                        | Respiratory | Read |
| F5871 | Otogenic pain                                              | Respiratory | Read |
| F587z | Otalgia NOS                                                | Respiratory | Read |
| FyuP0 | [X]Other acute nonsuppurative otitis media                 | Respiratory | Read |
| FyuP3 | [X]Otitis media in bacterial diseases classified elsewhere | Respiratory | Read |
| FyuP4 | [X]Otitis media in viral diseases classified elsewhere     | Respiratory | Read |
| FyuP5 | [X]Otitis media in other diseases classified elsewhere     | Respiratory | Read |
| FyuP7 | [X]Other mastoiditis and related conditions                | Respiratory | Read |
| H00.. | Acute nasopharyngitis                                      | Respiratory | Read |
| H01.. | Acute sinusitis                                            | Respiratory | Read |
| H010. | Acute maxillary sinusitis                                  | Respiratory | Read |
| H011. | Acute frontal sinusitis                                    | Respiratory | Read |
| H012. | Acute ethmoidal sinusitis                                  | Respiratory | Read |
| H013. | Acute sphenoidal sinusitis                                 | Respiratory | Read |
| H014. | Acute rhinosinusitis                                       | Respiratory | Read |
| H01y. | Other acute sinusitis                                      | Respiratory | Read |
| H01y0 | Acute pansinusitis                                         | Respiratory | Read |
| H01yz | Other acute sinusitis NOS                                  | Respiratory | Read |
| H01z. | Acute sinusitis NOS                                        | Respiratory | Read |

|           |                                         |             |      |
|-----------|-----------------------------------------|-------------|------|
| H02..     | Acute pharyngitis                       | Respiratory | Read |
| H020.     | Acute gangrenous pharyngitis            | Respiratory | Read |
| H021.     | Acute phlegmonous pharyngitis           | Respiratory | Read |
| H022.     | Acute ulcerative pharyngitis            | Respiratory | Read |
| H023.     | Acute bacterial pharyngitis             | Respiratory | Read |
| H023<br>0 | Acute pneumococcal pharyngitis          | Respiratory | Read |
| H023<br>1 | Acute staphylococcal pharyngitis        | Respiratory | Read |
| H023z     | Acute bacterial pharyngitis NOS         | Respiratory | Read |
| H024.     | Acute viral pharyngitis                 | Respiratory | Read |
| H02z.     | Acute pharyngitis NOS                   | Respiratory | Read |
| H03..     | Acute tonsillitis                       | Respiratory | Read |
| H030.     | Acute erythematous tonsillitis          | Respiratory | Read |
| H031.     | Acute follicular tonsillitis            | Respiratory | Read |
| H032.     | Acute ulcerative tonsillitis            | Respiratory | Read |
| H033.     | Acute catarrhal tonsillitis             | Respiratory | Read |
| H034.     | Acute gangrenous tonsillitis            | Respiratory | Read |
| H035.     | Acute bacterial tonsillitis             | Respiratory | Read |
| H035<br>0 | Acute pneumococcal tonsillitis          | Respiratory | Read |
| H035<br>1 | Acute staphylococcal tonsillitis        | Respiratory | Read |
| H035z     | Acute bacterial tonsillitis NOS         | Respiratory | Read |
| H036.     | Acute viral tonsillitis                 | Respiratory | Read |
| H037.     | Recurrent acute tonsillitis             | Respiratory | Read |
| H03z.     | Acute tonsillitis NOS                   | Respiratory | Read |
| H04..     | Acute laryngitis and tracheitis         | Respiratory | Read |
| H040.     | Acute laryngitis                        | Respiratory | Read |
| H040<br>0 | Acute oedematous laryngitis             | Respiratory | Read |
| H040<br>1 | Acute ulcerative laryngitis             | Respiratory | Read |
| H040<br>2 | Acute catarrhal laryngitis              | Respiratory | Read |
| H040<br>3 | Acute phlegmonous laryngitis            | Respiratory | Read |
| H040<br>4 | Acute haemophilus influenzae laryngitis | Respiratory | Read |
| H040<br>5 | Acute pneumococcal laryngitis           | Respiratory | Read |
| H040<br>6 | Acute suppurative laryngitis            | Respiratory | Read |
| H040<br>w | Acute viral laryngitis unspecified      | Respiratory | Read |
| H040x     | Acute bacterial laryngitis unspecified  | Respiratory | Read |
| H040z     | Acute laryngitis NOS                    | Respiratory | Read |

|           |                                                      |             |      |
|-----------|------------------------------------------------------|-------------|------|
| H042.     | Acute laryngotracheitis                              | Respiratory | Read |
| H042<br>0 | Acute laryngotracheitis without obstruction          | Respiratory | Read |
| H042<br>1 | Acute laryngotracheitis with obstruction             | Respiratory | Read |
| H042z     | Acute laryngotracheitis NOS                          | Respiratory | Read |
| H043.     | Acute epiglottitis (non strep)                       | Respiratory | Read |
| H043<br>0 | Acute epiglottitis without obstruction               | Respiratory | Read |
| H043<br>1 | Acute epiglottitis with obstruction                  | Respiratory | Read |
| H043<br>2 | Acute obstructive laryngitis                         | Respiratory | Read |
| H043z     | Acute epiglottitis NOS                               | Respiratory | Read |
| H044.     | Croup                                                | Respiratory | Read |
| H04z.     | Acute laryngitis and tracheitis NOS                  | Respiratory | Read |
| H05..     | Other acute upper respiratory infections             | Respiratory | Read |
| H050.     | Acute laryngopharyngitis                             | Respiratory | Read |
| H051.     | Acute upper respiratory tract infection              | Respiratory | Read |
| H052.     | Pharyngotracheitis                                   | Respiratory | Read |
| H053.     | Tracheopharyngitis                                   | Respiratory | Read |
| H054.     | Recurrent upper respiratory tract infection          | Respiratory | Read |
| H055.     | Pharyngolaryngitis                                   | Respiratory | Read |
| H05y.     | Other upper respiratory infections of multiple sites | Respiratory | Read |
| H05z.     | Upper respiratory infection NOS                      | Respiratory | Read |
| H120<br>1 | Chronic catarrhal rhinitis                           | Respiratory | Read |
| H121<br>1 | Atrophic pharyngitis                                 | Respiratory | Read |
| H121<br>2 | Granular pharyngitis                                 | Respiratory | Read |
| H121<br>3 | Hypertrophic pharyngitis                             | Respiratory | Read |
| H130.     | Chronic maxillary sinusitis                          | Respiratory | Read |
| H131.     | Chronic frontal sinusitis                            | Respiratory | Read |
| H135.     | Recurrent sinusitis                                  | Respiratory | Read |
| H13y1     | Pansinusitis                                         | Respiratory | Read |
| H141.     | Tonsil and/or adenoid hypertrophy                    | Respiratory | Read |
| H15..     | Peritonsillar abscess - quinsy                       | Respiratory | Read |
| H1y1z     | Nasal cavity and sinus disease NOS                   | Respiratory | Read |
| H1y22     | Parapharyngeal abscess                               | Respiratory | Read |
| H1y23     | Retropharyngeal abscess                              | Respiratory | Read |
| H1y26     | Pharynx or nasopharynx abscess                       | Respiratory | Read |
| H27..     | Influenza                                            | Respiratory | Read |
| H271<br>0 | Influenza with laryngitis                            | Respiratory | Read |
| H271      | Influenza with pharyngitis                           | Respiratory | Read |

|       |                                                                              |             |        |
|-------|------------------------------------------------------------------------------|-------------|--------|
| 1     |                                                                              |             |        |
| H27z. | Influenza NOS                                                                | Respiratory | Read   |
| H29.. | Avian influenza                                                              | Respiratory | Read   |
| H2A.. | Influenza due to Influenza A virus subtype H1N1                              | Respiratory | Read   |
| Hyu0. | [X]Acute upper respiratory infections                                        | Respiratory | Read   |
| Hyu00 | [X]Other acute sinusitis                                                     | Respiratory | Read   |
| Hyu01 | [X]Acute pharyngitis due to other specified organisms                        | Respiratory | Read   |
| Hyu02 | [X]Acute tonsillitis due to other specified organisms                        | Respiratory | Read   |
| Hyu04 | [X]Flu+oth respiratory manifestations,'flu virus identified                  | Respiratory | Read   |
| Hyu05 | [X]Influenza+other manifestations,influenza virus identified                 | Respiratory | Read   |
| Hyu06 | [X]Influenza+oth respiratory manifestatns,virus not identifd                 | Respiratory | Read   |
| Hyu07 | [X]Influenza+other manifestations, virus not identified                      | Respiratory | Read   |
| R041. | [D]Throat pain                                                               | Respiratory | Read   |
| R1532 | [D]Positive culture findings in throat                                       | Respiratory | Read   |
| J43.  | Emphysema                                                                    | Respiratory | ICD-10 |
| J430  | MacLeod's syndrome                                                           | Respiratory | ICD-10 |
| J431  | Panlobular emphysema                                                         | Respiratory | ICD-10 |
| J432  | Centrilobular emphysema                                                      | Respiratory | ICD-10 |
| J438  | Other emphysema                                                              | Respiratory | ICD-10 |
| J439  | Emphysema, unspecified                                                       | Respiratory | ICD-10 |
| J44.  | Other chronic obstructive pulmonary disease                                  | Respiratory | ICD-10 |
| J440  | Chronic obstructive pulmonary disease with acute lower respiratory infection | Respiratory | ICD-10 |
| J441  | Chronic obstructive pulmonary disease with acute exacerbation, unspecified   | Respiratory | ICD-10 |
| J448  | Other specified chronic obstructive pulmonary disease                        | Respiratory | ICD-10 |
| J449  | Chronic obstructive pulmonary disease, unspecified                           | Respiratory | ICD-10 |
| J45.  | Asthma                                                                       | Respiratory | ICD-10 |
| J450  | Predominantly allergic asthma                                                | Respiratory | ICD-10 |
| J451  | Nonallergic asthma                                                           | Respiratory | ICD-10 |
| J458  | Mixed asthma                                                                 | Respiratory | ICD-10 |
| J459  | Asthma, unspecified                                                          | Respiratory | ICD-10 |
| J46X  | Status asthmaticus                                                           | Respiratory | ICD-   |



|       |                                                       |             |        |
|-------|-------------------------------------------------------|-------------|--------|
|       |                                                       |             | 10     |
| J40.  | Bronchitis, not specified as acute or chronic         | Respiratory | ICD-10 |
| J41.  | Simple and mucopurulent chronic bronchitis            | Respiratory | ICD-10 |
| J42.  | Unspecified chronic bronchitis                        | Respiratory | ICD-10 |
| J43.  | Emphysema                                             | Respiratory | ICD-10 |
| J44.  | Other chronic obstructive pulmonary disease           | Respiratory | ICD-10 |
| 8795. | Asthma control step 2                                 | Respiratory | Read   |
| H3300 | Extrinsic asthma without status asthmaticus           | Respiratory | Read   |
| H331. | Late onset asthma                                     | Respiratory | Read   |
| 679J. | Health education - asthma                             | Respiratory | Read   |
| H334. | Brittle asthma                                        | Respiratory | Read   |
| 663d. | Emergency asthma admission since last appointment     | Respiratory | Read   |
| 90J5. | Asthma monitor 2nd letter                             | Respiratory | Read   |
| 8B3j. | Asthma medication review                              | Respiratory | Read   |
| H33z1 | Asthma attack                                         | Respiratory | Read   |
| 1782. | Asthma trigger - tobacco smoke                        | Respiratory | Read   |
| 663t. | Asthma causes daytime symptoms 1 to 2 times per month | Respiratory | Read   |
| 66YQ. | Asthma monitoring by nurse                            | Respiratory | Read   |
| 388t. | Royal College of Physicians asthma assessment         | Respiratory | Read   |
| 663Q. | Asthma not limiting activities                        | Respiratory | Read   |
| 66YC. | Absent from work or school due to asthma              | Respiratory | Read   |
| 663V2 | Moderate asthma                                       | Respiratory | Read   |
| 66YK. | Asthma follow-up                                      | Respiratory | Read   |
| H33.. | Bronchial asthma                                      | Respiratory | Read   |
| H3301 | Extrinsic asthma with asthma attack                   | Respiratory | Read   |
| 663V. | Asthma severity                                       | Respiratory | Read   |
| H33zz | Asthma NOS                                            | Respiratory | Read   |
| 663q. | Asthma daytime symptoms                               | Respiratory | Read   |
| H331. | Intrinsic asthma                                      | Respiratory | Read   |
| 90J2. | Refuses asthma monitoring                             | Respiratory | Read   |
| 663.. | Asthma sometimes restricts exercise                   | Respiratory | Read   |
| H33z1 | Asthma attack NOS                                     | Respiratory | Read   |
| 1785. | Asthma trigger - damp                                 | Respiratory | Read   |
| 663y. | Number of asthma exacerbations in past year           | Respiratory | Read   |
| 663N. | Asthma disturbing sleep                               | Respiratory | Read   |
| 663P1 | Asthma limits activities 1 to 2 times per week        | Respiratory | Read   |
| 663N2 | Asthma disturbs sleep frequently                      | Respiratory | Read   |
| 663j. | Asthma - currently active                             | Respiratory | Read   |

|       |                                                                 |             |      |
|-------|-----------------------------------------------------------------|-------------|------|
| 90JB. | Asthma monitoring invit SMS (short message service) txt message | Respiratory | Read |
| 8797. | Asthma control step 4                                           | Respiratory | Read |
| H3311 | Intrinsic asthma with asthma attack                             | Respiratory | Read |
| 1780. | Aspirin induced asthma                                          | Respiratory | Read |
| 663W. | Asthma prophylactic medication used                             | Respiratory | Read |
| 663.. | Asthma monitoring                                               | Respiratory | Read |
| H332. | Mixed asthma                                                    | Respiratory | Read |
| 679J1 | Health education - structured asthma discussion                 | Respiratory | Read |
| H33z. | Asthma unspecified                                              | Respiratory | Read |
| 1788. | Asthma trigger - cold air                                       | Respiratory | Read |
| 90J3. | Asthma monitor offer default                                    | Respiratory | Read |
| 663r. | Asthma causes night symptoms 1 to 2 times per month             | Respiratory | Read |
| 661N1 | Asthma self-management plan review                              | Respiratory | Read |
| 66Y9. | Step up change in asthma management plan                        | Respiratory | Read |
| 663O. | Asthma not disturbing sleep                                     | Respiratory | Read |
| 66Yz0 | Asthma management plan declined                                 | Respiratory | Read |
| 66YA. | Step down change in asthma management plan                      | Respiratory | Read |
| 9NNX. | Under care of asthma specialist nurse                           | Respiratory | Read |
| 663V1 | Mild asthma                                                     | Respiratory | Read |
| H3300 | Hay fever with asthma                                           | Respiratory | Read |
| H3311 | Intrinsic asthma with status asthmaticus                        | Respiratory | Read |
| 66Yq. | Asthma causes night time symptoms 1 to 2 times per week         | Respiratory | Read |
| 8794. | Asthma control step 1                                           | Respiratory | Read |
| H33z2 | Late-onset asthma                                               | Respiratory | Read |
| 679J2 | Health education - structured patient focused asthma discuss    | Respiratory | Read |
| 663w. | Asthma limits walking up hills or stairs                        | Respiratory | Read |
| H33z. | Hyperreactive airways disease                                   | Respiratory | Read |
| 90J8. | Asthma monitor phone invite                                     | Respiratory | Read |
| 1783. | Asthma trigger - warm air                                       | Respiratory | Read |
| 663P0 | Asthma limits activities 1 to 2 times per month                 | Respiratory | Read |
| 663N1 | Asthma disturbs sleep weekly                                    | Respiratory | Read |
| H331z | Intrinsic asthma NOS                                            | Respiratory | Read |
| 178A. | Asthma trigger - airborne dust                                  | Respiratory | Read |
| 663U. | Asthma management plan given                                    | Respiratory | Read |
| 90JA. | Asthma monitored                                                | Respiratory | Read |
| 66YJ. | Asthma annual review                                            | Respiratory | Read |
| 178.. | Asthma trigger                                                  | Respiratory | Read |
| 8791. | Further asthma - drug prevent.                                  | Respiratory | Read |

|       |                                                              |             |      |
|-------|--------------------------------------------------------------|-------------|------|
| 663p. | Asthma treatment compliance unsatisfactory                   | Respiratory | Read |
| 9OJ1. | Attends asthma monitoring                                    | Respiratory | Read |
| 38DT. | Asthma control questionnaire                                 | Respiratory | Read |
| H330. | Extrinsic (atopic) asthma                                    | Respiratory | Read |
| 679J0 | Health education - asthma self management                    | Respiratory | Read |
| 9OJ.. | Asthma clinic administration                                 | Respiratory | Read |
| 1786. | Asthma trigger - animals                                     | Respiratory | Read |
| 663x. | Asthma limits walking on the flat                            | Respiratory | Read |
| 388t0 | Royal College Physician asthma assessment 3 question score   | Respiratory | Read |
| 66Yp. | Asthma review using Roy Colleg of Physicians three questions | Respiratory | Read |
| 8H2P. | Emergency admission, asthma                                  | Respiratory | Read |
| 663V0 | Occasional asthma                                            | Respiratory | Read |
| 8796. | Asthma control step 3                                        | Respiratory | Read |
| 663m. | Asthma accident and emergency attendance since last visit    | Respiratory | Read |
| 66Ys. | Asthma never causes night symptoms                           | Respiratory | Read |
| 9OJZ. | Asthma monitoring admin.NOS                                  | Respiratory | Read |
| H3310 | Intrinsic asthma without status asthmaticus                  | Respiratory | Read |
| 9OJ.. | Asthma monitoring admin.                                     | Respiratory | Read |
| H335. | Chronic asthma with fixed airflow obstruction                | Respiratory | Read |
| 38DL. | Asthma control test                                          | Respiratory | Read |
| 663e. | Asthma restricts exercise                                    | Respiratory | Read |
| 9OJ6. | Asthma monitor 3rd letter                                    | Respiratory | Read |
| 663u. | Asthma causes daytime symptoms 1 to 2 times per week         | Respiratory | Read |
| 66YP. | Asthma night-time symptoms                                   | Respiratory | Read |
| 1781. | Asthma trigger - pollen                                      | Respiratory | Read |
| 1789. | Asthma trigger - respiratory infection                       | Respiratory | Read |
| 663N0 | Asthma causing night waking                                  | Respiratory | Read |
| 173A. | Exercise induced asthma                                      | Respiratory | Read |
| 102.. | Asthma confirmed                                             | Respiratory | Read |
| 38DV. | Mini asthma quality of life questionnaire                    | Respiratory | Read |
| 663n. | Asthma treatment compliance satisfactory                     | Respiratory | Read |
| H33.. | Asthma                                                       | Respiratory | Read |
| H3301 | Extrinsic asthma with status asthmaticus                     | Respiratory | Read |
| 66Yr. | Asthma causes symptoms most nights                           | Respiratory | Read |
| H33zz | Allergic bronchitis NEC                                      | Respiratory | Read |
| H33zz | Allergic asthma NEC                                          | Respiratory | Read |
| 66Y5. | Change in asthma management plan                             | Respiratory | Read |
| H33zz | Exercise induced asthma                                      | Respiratory | Read |
| 663f. | Asthma never restricts exercise                              | Respiratory | Read |
| 38QM  | Childhood Asthma Control Test                                | Respiratory | Read |

|       |                                                              |             |      |
|-------|--------------------------------------------------------------|-------------|------|
| .     |                                                              |             |      |
| 663v. | Asthma causes daytime symptoms most days                     | Respiratory | Read |
| H33z0 | Status asthmaticus NOS                                       | Respiratory | Read |
| 1784. | Asthma trigger - emotion                                     | Respiratory | Read |
| 90J7. | Asthma monitor verbal invite                                 | Respiratory | Read |
| H47y0 | Detergent asthma                                             | Respiratory | Read |
| H330z | Extrinsic asthma NOS                                         | Respiratory | Read |
| 66300 | Asthma never disturbs sleep                                  | Respiratory | Read |
| 66YE. | Asthma monitoring due                                        | Respiratory | Read |
| 66Yu. | Number days absent from school due to asthma in past 6 month | Respiratory | Read |
| 178B. | Asthma trigger - exercise                                    | Respiratory | Read |
| 90JA. | Asthma monitoring check done                                 | Respiratory | Read |
| H35y7 | Wood asthma                                                  | Respiratory | Read |
| 8798. | Asthma control step 5                                        | Respiratory | Read |
| H330. | Pollen asthma                                                | Respiratory | Read |
| H330. | Hay fever with asthma                                        | Respiratory | Read |
| 66YZ. | Does not have asthma management plan                         | Respiratory | Read |
| H330. | Childhood asthma                                             | Respiratory | Read |
| H330. | Allergic asthma                                              | Respiratory | Read |
| 66300 | Asthma severely restricts exercise                           | Respiratory | Read |
| H333. | Acute exacerbation of asthma                                 | Respiratory | Read |
| 8CR0. | Asthma clinical management plan                              | Respiratory | Read |
| H33z0 | Severe asthma attack                                         | Respiratory | Read |
| 1787. | Asthma trigger - seasonal                                    | Respiratory | Read |
| 90J4. | Asthma monitor 1st letter                                    | Respiratory | Read |
| H3120 | Chronic asthmatic bronchitis                                 | Respiratory | Read |
| 663s. | Asthma never causes daytime symptoms                         | Respiratory | Read |
| 66YR. | Asthma monitoring by doctor                                  | Respiratory | Read |
| 663P. | Asthma limiting activities                                   | Respiratory | Read |
| 661M1 | Asthma self-management plan agreed                           | Respiratory | Read |
| 663P2 | Asthma limits activities most days                           | Respiratory | Read |
| 663V3 | Severe asthma                                                | Respiratory | Read |
| 8CMA0 | Patient has a written asthma personal action plan            | Respiratory | Read |
| 130.. | Sickness/invalidity benefit                                  | SICK        | Read |
| 1301. | Sickness benefit                                             | SICK        | Read |
| 1302. | Statutory sick pay                                           | SICK        | Read |
| 9C8.. | LOC1/2/3- notific. of sickness                               | SICK        | Read |
| 9C83. | LOC 3-sickness payment record                                | SICK        | Read |
| 9DK.. | Sick note generated from secondary care done by practice     | SICK        | Read |
| 9K8.. | Sickness certificate                                         | SICK        | Read |
